# Supplementary material for: Identification and Characterization of Immunogene-Related Alternative Splicing Patterns and Tumor Microenvironment Infiltration Patterns in Breast Cancer
Source: Cancers (Basel). 2022 Jan 25;14(3):595. doi: 10.3390/cancers14030595 (PMC8833331; doi:10.3390/cancers14030595)
Supplement: Supplementary file 1 [file cancers-14-00595-s001.zip › Supplementary Tables.xlsx]

## Sheet: Table S1
Table S1. Clinicopathological characteristics of breast cancer patients in TCGA.
Clinicopathological characteristics		Patients	Percent (%)
Overall Survival status	Alive	817	89
	Dead	101	11
Overall Survival time	< 5years	785	85.51
	≥ 5years	133	14.49
Relapse-free survival status	Non-Relapse	783	85.29
	Relapse	135	14.71
Relapse-free survival time	< 5years	695	75.71
	≥ 5years	221	24.07
	NA	2	0.22
Stage	I	167	18.19
	II	510	55.56
	III	203	22.11
	IV	18	1.96
	NA	20	2.18
T	T1	256	27.89
	T2	509	55.45
	T3	118	12.85
	T4	32	3.49
	TX	3	0.32
N	N0	427	46.52
	N1	315	34.31
	N2	95	10.35
	N3	66	7.19
	NX	15	1.63
M	M0	753	82.03
	M1	20	2.18
	MX	145	15.79
ER status	ER+	514	55.99
	ER−	143	15.58
	NA	261	28.43
PR status	PR+	451	49.13
	PR−	205	22.33
	NA	262	28.54
HER2 status	HER2+	87	9.48
	HER2−	543	59.15
	NA	288	31.37
Positive lymph nodes	0	395	43.03
	1~10	367	39.98
	≥ 11	47	5.12
	NA	109	11.87
Total		918	100

## Sheet: Table S2
Table S2. Information of experimentally validated splicing factors in the SpliceAid-F and SpliceAid 2 databases.
Splicing Factor	Gene Symbol	geneID
Fox-1	RBFOX1	54715
CUG-BP1	CELF1	10658
ETR-3	CELF2	10659
DAZAP1	DAZAP1	26528
HuR	ELAVL1	1994
HuB	ELAVL2	1993
HuC	ELAVL3	1995
HuD	ELAVL4	1996
ESRP1	ESRP1	54845
ESRP2	ESRP2	80004
FMRP	FMR1	2332
hnRNP P	FUS	2521
hnRNP A0	HNRNPA0	10949
hnRNP A1	HNRNPA1	3178
hnRNP A2/B1	HNRNPA2B1	3181
hnRNP A3	HNRNPA3	220988
hnRNP C	HNRNPC	3183
hnRNP D	HNRNPD	3184
hnRNP F	HNRNPF	3185
hnRNP H1	HNRNPH1	3187
hnRNP H2	HNRNPH2	3188
hnRNP H3	HNRNPH3	3189
hnRNP J	HNRNPK	3190
hnRNP K	HNRNPK	3190
hnRNP L	HNRNPL	3191
hnRNP M	HNRNPM	4670
hnRNP U	HNRNPU	3192
hnRNP DL	HNRNPDL	9987
Sam68	KHDRBS1	10657
SLM-1	KHDRBS2	202559
SLM-2	KHDRBS3	10656
KSRP	KHSRP	8570
MBNL1	MBNL1	4154
Nova-1	NOVA1	4857
Nova-2	NOVA2	4858
hnRNP E1	PCBP1	5093
hnRNP E2	PCBP2	5094
hnRNP I	PTBP1	5725
nPTB	PTBP2	58155
QKI	QKI	9444
Fox-2	RBFOX2	23543
RBM25	RBM25	58517
RBM4	RBM4	5936
RBM5	RBM5	10181
hnRNP G	RBMX	27316
SF1	SF1	7536
SAP155	SF3B1	23451
PSF	SFPQ	6421
SF2/ASF	PSIP1	6426
SRp54	SRSF11	9295
SRp38	SRSF10	10772
SC35	SRSF2	6427
SRp20	SRSF3	6428
SRp75	SRSF4	6429
SRp40	SRSF5	6430
SRp55	SRSF6	6431
9G8	SRSF7	6432
SRp30c	SRSF9	8683
SRm160	SRRM1	10250
hnRNP Q	SYNCRIP	10492
TDP43	TARDBP	23435
TIA-1	TIA1	7072
TIAL1	TIAL1	7073
HTra2alpha	TRA2A	29896
HTra2beta1	TRA2B	6434
YB-1	YBX1	4904
ZRANB2	ZRANB2	9406

## Sheet: Table S3
Table S3. Statistical information of AS events and parent genes in each phase.
	AA		AD		AP		AT		ES		ME		RI
	Event	Gene	Event	Gene	Event	Gene	Event	Gene	Event	Gene	Event	Gene	Event	Gene
Overall	669	559	774	621	3392	1614	1618	820	3939	2276	72	69	843	638
DSAS	375	345	479	443	2498	1801	1298	1044	2756	1966	47	47	547	495
Differentially spliced IGAS	200	179	234	206	1426	705	890	465	1430	912	21	21	263	217
Survival-related IGAS	12	12	31	29	164	113	125	75	126	109	2	2	29	26
Prognostic-related IGAS	7	7	10	10	18	18	39	29	43	38	2	2	8	8

## Sheet: Table S4
Table S4. Statistical information of DSAS and IGAS parent genes on each chromosome.
	Chr1	Chr2	Chr3	Chr4	Chr5	Chr6	Chr7	Chr8	Chr9	Chr10	Chr11	Chr12	Chr13	Chr14	Chr15	Chr16	Chr17	Chr18	Chr19	Chr20	Chr21	Chr22	ChrX	ChrY
DSAS	386	257	239	136	186	135	174	149	147	145	241	236	58	153	111	188	264	64	325	75	39	101	116	0
IGAS	199	126	121	79	116	80	91	101	84	81	117	141	25	90	61	112	166	47	183	37	23	50	69	0

## Sheet: Table S5
Table S5. Differentially spliced IGAS events and parent genes.
AS ID	Gene Symbol	AS Type	P-values	FDR	log2 (Fold Change)	Regulation
ID_86879	ECM2	AA	9.63505e-78	8.66072e-76	1.24029	Up
ID_33878	C16orf89	AA	1.57336e-63	8.56248e-62	1.07402	Up
ID_65146	ABHD14B	AA	1.81035e-49	4.92611e-48	0.798944	Up
ID_29123	SERPINA1	AA	1.67928e-46	3.99829e-45	-0.597056	Down
ID_29115	SERPINA1	AA	4.34903e-40	7.35566e-39	-0.467391	Down
ID_39851	KSR1	AA	3.28856e-39	5.35814e-38	1.15667	Up
ID_47875	RTBDN	AA	2.54011e-38	3.92296e-37	-0.249683	Down
ID_39057	TMEM88	AA	1.12779e-37	1.6708e-36	0.354104	Up
ID_50645	MEIS3	AA	2.42511e-35	3.21739e-34	0.554063	Up
ID_7741	S100A1	AA	8.76969e-35	1.14077e-33	1.09564	Up
ID_67256	PFN2	AA	2.34592e-32	2.68873e-31	0.580231	Up
ID_15763	CELF1	AA	2.17097e-31	2.37589e-30	-0.339217	Down
ID_16164	CYB561A3	AA	5.38424e-30	5.39098e-29	-0.497677	Down
ID_7539	FAM63A	AA	5.88332e-30	5.86865e-29	-0.205758	Down
ID_3533	USP33	AA	2.32116e-28	2.09505e-27	-0.159884	Down
ID_73602	MZB1	AA	2.17337e-27	1.84575e-26	1.05206	Up
ID_84004	ADHFE1	AA	6.83073e-26	5.34172e-25	0.637766	Up
ID_88255	ABCA2	AA	3.7252e-25	2.79303e-24	0.737034	Up
ID_48246	USHBP1	AA	1.99859e-23	1.35154e-22	0.387392	Up
ID_87882	FNBP1	AA	1.03275e-22	6.62553e-22	-0.168438	Down
ID_81117	POLR2J3	AA	2.9105e-21	1.68969e-20	0.591411	Up
ID_36018	INO80E	AA	1.11648e-20	6.19834e-20	-0.513911	Down
ID_89976	SEPT6	AA	4.11252e-20	2.18959e-19	0.818151	Up
ID_18154	SYTL2	AA	6.70404e-20	3.54476e-19	0.728521	Up
ID_51883	LAIR1	AA	4.54447e-19	2.28653e-18	-0.739431	Down
ID_88702	APOO	AA	3.7119e-18	1.74472e-17	0.296698	Up
ID_82995	BMP1	AA	2.78348e-17	1.23504e-16	-0.849394	Down
ID_53400	DYNC2LI1	AA	3.62323e-17	1.59702e-16	0.388085	Up
ID_65006	HYAL2	AA	5.86631e-17	2.54228e-16	0.819429	Up
ID_41069	COASY	AA	7.09193e-17	3.05029e-16	1.30668	Up
ID_9441	ADORA1	AA	1.6388e-16	6.90385e-16	0.384119	Up
ID_75660	BTN3A1	AA	4.98573e-16	2.03499e-15	0.564116	Up
ID_61995	APOL3	AA	1.28075e-15	5.05475e-15	0.358836	Up
ID_425	TNFRSF25	AA	3.73921e-15	1.42786e-14	0.207949	Up
ID_70537	INTU	AA	4.48469e-15	1.70439e-14	-0.198296	Down
ID_28046	MPP5	AA	2.26908e-14	8.20273e-14	-0.103283	Down
ID_38812	XAF1	AA	3.31845e-14	1.18463e-13	-0.347865	Down
ID_24375	GIT2	AA	5.23808e-14	1.83954e-13	0.357962	Up
ID_76141	PRICKLE4	AA	5.64183e-14	1.9733e-13	0.295089	Up
ID_59380	RALGAPB	AA	6.18612e-14	2.1545e-13	0.264893	Up
ID_67163	PLSCR1	AA	9.04317e-14	3.09168e-13	-0.173976	Down
ID_20538	EMP1	AA	1.13262e-13	3.8508e-13	-0.66513	Down
ID_78411	QKI	AA	2.55151e-13	8.41735e-13	-0.4648	Down
ID_61333	DERL3	AA	2.79319e-13	9.17681e-13	-0.283621	Down
ID_30240	ZSCAN29	AA	4.8651e-13	1.56434e-12	-0.654801	Down
ID_9244	UCHL5	AA	6.36599e-13	2.02819e-12	-0.573669	Down
ID_17786	XRRA1	AA	1.39287e-12	4.31397e-12	0.312615	Up
ID_94524	RPL23	AA	2.44539e-12	7.40187e-12	0.471351	Up
ID_80019	STX1A	AA	8.15015e-12	2.36322e-11	-0.0622171	Down
ID_68840	LDB2	AA	9.51716e-12	2.74368e-11	0.52238	Up
ID_84373	RMDN1	AA	1.39843e-11	3.97564e-11	-0.0569067	Down
ID_89089	MAGIX	AA	1.67974e-11	4.74001e-11	-0.311214	Down
ID_86732	AGTPBP1	AA	1.69218e-11	4.77344e-11	0.157347	Up
ID_72601	TBCA	AA	3.74483e-11	1.0288e-10	-0.286715	Down
ID_41064	COASY	AA	4.04613e-11	1.10777e-10	0.343904	Up
ID_14787	METTL15	AA	6.8318e-11	1.83404e-10	0.246738	Up
ID_47749	ACP5	AA	1.11508e-10	2.92098e-10	-0.315504	Down
ID_47367	ZNF561	AA	1.30971e-10	3.40626e-10	0.344845	Up
ID_29255	SLC25A29	AA	1.44363e-10	3.73877e-10	-0.328631	Down
ID_64990	NAT6	AA	2.4141e-10	6.1194e-10	-0.0919656	Down
ID_40482	MYO19	AA	3.42552e-10	8.52914e-10	-0.344498	Down
ID_12291	KCNMA1	AA	3.99313e-10	9.88705e-10	-0.318822	Down
ID_68406	PCGF3	AA	4.53186e-10	1.11451e-09	-0.438473	Down
ID_72303	SLC30A5	AA	8.03653e-10	1.93651e-09	0.266793	Up
ID_73348	TCF7	AA	2.10355e-09	4.89624e-09	-0.303742	Down
ID_75659	BTN3A1	AA	3.27373e-09	7.51933e-09	0.329493	Up
ID_15918	TMX2	AA	6.46146e-09	1.44229e-08	0.375219	Up
ID_114552	SEC24C	AA	7.73111e-09	1.71659e-08	-0.258225	Down
ID_426	TNFRSF25	AA	8.66287e-09	1.91233e-08	0.124513	Up
ID_13390	BUB3	AA	9.95494e-09	2.18131e-08	-0.0891279	Down
ID_29188	BDKRB2	AA	1.02703e-08	2.24672e-08	0.749344	Up
ID_17444	FAM86C1	AA	1.46452e-08	3.16654e-08	0.520475	Up
ID_24407	C12orf76	AA	2.14046e-08	4.55538e-08	0.419401	Up
ID_78408	QKI	AA	3.36389e-08	7.01542e-08	0.356059	Up
ID_48336	FAM129C	AA	3.59339e-08	7.4629e-08	-0.0641597	Down
ID_48982	ZNF302	AA	4.65779e-08	9.55444e-08	0.183504	Up
ID_15838	SLC43A3	AA	7.35188e-08	1.48298e-07	0.269422	Up
ID_18541	CASP1	AA	1.41965e-07	2.7884e-07	-0.0800062	Down
ID_61345	SLC2A11	AA	1.64461e-07	3.21292e-07	0.345161	Up
ID_55281	CCDC74B	AA	1.81597e-07	3.52959e-07	-0.352232	Down
ID_37890	C16orf74	AA	1.82079e-07	3.53722e-07	0.206053	Up
ID_56830	CASP8	AA	1.88986e-07	3.66517e-07	-0.0825678	Down
ID_54387	ST3GAL5	AA	4.45639e-07	8.36881e-07	-0.399607	Down
ID_19161	TMEM136	AA	4.61813e-07	8.65832e-07	-0.2714	Down
ID_40409	CCL4L1	AA	4.84051e-07	9.05403e-07	-0.0416195	Down
ID_17168	SSH3	AA	5.07641e-07	9.47754e-07	-0.350281	Down
ID_176	ATAD3A	AA	1.78448e-06	3.17453e-06	-0.345933	Down
ID_33418	IL32	AA	2.91091e-06	5.06355e-06	0.471194	Up
ID_62852	TYMP	AA	5.66111e-06	9.59713e-06	-0.193417	Down
ID_24313	UBE3B	AA	6.23334e-06	1.05204e-05	0.619803	Up
ID_85663	ZNF7	AA	6.5186e-06	1.09903e-05	-0.249858	Down
ID_35589	GGA2	AA	6.84046e-06	1.1499e-05	0.301449	Up
ID_60292	CYYR1	AA	7.01099e-06	1.17758e-05	0.126032	Up
ID_13012	CALHM2	AA	9.18385e-06	1.52587e-05	0.176286	Up
ID_49277	U2AF1L4	AA	1.02603e-05	1.69873e-05	0.118766	Up
ID_76637	FAM135A	AA	1.03526e-05	1.71329e-05	-0.187701	Down
ID_21893	KRT80	AA	1.126e-05	1.85465e-05	-0.172944	Down
ID_46437	CIRBP	AA	1.68655e-05	2.71914e-05	0.15139	Up
ID_36186	C16orf93	AA	1.69348e-05	2.72867e-05	-0.228661	Down
ID_71173	GALNT7	AA	2.26032e-05	3.58781e-05	-0.511674	Down
ID_15700	NR1H3	AA	2.49096e-05	3.93361e-05	0.12895	Up
ID_29256	SLC25A29	AA	2.50457e-05	3.95276e-05	-0.408432	Down
ID_80043	ELN	AA	2.51713e-05	3.9718e-05	0.728439	Up
ID_89770	MORF4L2	AA	2.54693e-05	4.01724e-05	-0.362064	Down
ID_39378	ZNF286A	AA	2.67268e-05	4.20563e-05	0.14967	Up
ID_75619	BTN3A2	AA	2.88216e-05	4.51749e-05	0.432035	Up
ID_51850	LILRB5	AA	3.13259e-05	4.89846e-05	0.128384	Up
ID_62836	LMF2	AA	5.74092e-05	8.71983e-05	0.316575	Up
ID_1609	ZBTB8A	AA	6.34185e-05	9.59069e-05	-0.0894255	Down
ID_84778	UBR5	AA	6.65933e-05	0.000100367	0.0990827	Up
ID_47658	TMEM205	AA	7.56169e-05	0.000113241	0.292283	Up
ID_82715	FAM86B1	AA	7.76983e-05	0.000116076	0.280111	Up
ID_24626	IQCD	AA	9.27414e-05	0.000137217	-0.169477	Down
ID_18540	CASP1	AA	9.5975e-05	0.00014187	-0.248435	Down
ID_10567	ZNF692	AA	0.00012163	0.000177854	-0.273871	Down
ID_36663	SETD6	AA	0.000128408	0.000187149	-0.294727	Down
ID_82987	BMP1	AA	0.000145703	0.000210973	-0.0974331	Down
ID_45164	ZNF24	AA	0.000148977	0.000215284	0.388899	Up
ID_55390	CCDC74A	AA	0.000160376	0.000231172	-0.153697	Down
ID_76140	PRICKLE4	AA	0.000190128	0.000271301	0.286471	Up
ID_2532	CCDC24	AA	0.000240295	0.00033873	-0.113163	Down
ID_38638	CAMTA2	AA	0.000257853	0.000362217	-0.188383	Down
ID_44470	ENOSF1	AA	0.000352861	0.000487798	-0.0621368	Down
ID_34173	KIAA0430	AA	0.00036213	0.000499749	0.119636	Up
ID_7329	NBPF11	AA	0.000392239	0.000539112	0.163953	Up
ID_67010	CEP70	AA	0.000442768	0.000604668	0.178299	Up
ID_72829	GLRX	AA	0.000523896	0.000710619	-0.0847288	Down
ID_48998	ZNF181	AA	0.000561989	0.00075983	0.141735	Up
ID_64991	NAT6	AA	0.000585659	0.000789698	0.177587	Up
ID_81963	HIPK2	AA	0.000593617	0.000799888	0.0658837	Up
ID_33229	MLST8	AA	0.000638318	0.000856803	0.079941	Up
ID_64803	WDR6	AA	0.000729989	0.000972023	-0.224384	Down
ID_62492	NAGA	AA	0.00073699	0.000981018	0.117078	Up
ID_49890	PLD3	AA	0.000754175	0.00100223	0.432486	Up
ID_60396	IFNAR2	AA	0.000918195	0.00120716	0.128108	Up
ID_2001	ZFP69	AA	0.00098921	0.00129563	-0.0453389	Down
ID_60930	C21orf58	AA	0.000997033	0.0013048	0.132601	Up
ID_52132	CCDC106	AA	0.00102246	0.0013359	-0.251979	Down
ID_7553	BNIPL	AA	0.0010252	0.0013386	-0.209904	Down
ID_10569	ZNF692	AA	0.00124733	0.00161336	-0.580318	Down
ID_54497	PROM2	AA	0.001331	0.00171272	0.0722873	Up
ID_94443	ZSWIM7	AA	0.00178901	0.0022635	0.201927	Up
ID_65052	CYB561D2	AA	0.0018479	0.0023332	-0.0945902	Down
ID_41887	DBF4B	AA	0.00190655	0.00240195	0.102844	Up
ID_83476	TM2D2	AA	0.00222498	0.00277819	-0.0694813	Down
ID_89701	ARMCX5	AA	0.00266665	0.00329521	0.143058	Up
ID_34394	ERI2	AA	0.00290252	0.00356904	-0.047836	Down
ID_61158	SCARF2	AA	0.00291078	0.00357809	-0.130537	Down
ID_9737	ATF3	AA	0.00294181	0.00361568	0.300377	Up
ID_60929	C21orf58	AA	0.00308395	0.00377992	0.126183	Up
ID_54420	MRPL35	AA	0.00328781	0.0040138	0.333387	Up
ID_85683	ZNF250	AA	0.0034479	0.00419394	0.156785	Up
ID_51668	ZNF415	AA	0.00416853	0.00500349	-0.03506	Down
ID_37621	TMEM231	AA	0.00419173	0.00502832	-0.137555	Down
ID_33228	MLST8	AA	0.00507115	0.0060156	0.062527	Up
ID_74765	GRK6	AA	0.00513159	0.00608369	-0.162244	Down
ID_983	RAP1GAP	AA	0.00571756	0.00673546	0.0736494	Up
ID_87881	FNBP1	AA	0.0063813	0.00746678	-0.0480993	Down
ID_85201	PHF20L1	AA	0.0064209	0.00750873	0.122967	Up
ID_33615	DNASE1	AA	0.00730661	0.00846162	0.0760431	Up
ID_69178	ATP10D	AA	0.00795517	0.00914125	0.0484164	Up
ID_64989	NAT6	AA	0.00796485	0.00915106	-0.0816555	Down
ID_67417	SHOX2	AA	0.00829571	0.00951479	0.120269	Up
ID_82455	RNF32	AA	0.0085695	0.00981193	-0.0908462	Down
ID_50291	ZNF226	AA	0.0095735	0.0108883	-0.0751316	Down
ID_58756	CSRP2BP	AA	0.011232	0.0126362	-0.0886039	Down
ID_9459	ZC3H11A	AA	0.012219	0.0136805	-0.220818	Down
ID_33452	ZNF205	AA	0.0134545	0.0149702	0.0649672	Up
ID_52128	CCDC106	AA	0.0137392	0.0152636	0.100463	Up
ID_58794	DZANK1	AA	0.0137787	0.0153033	-0.105953	Down
ID_47214	CD320	AA	0.0138777	0.0154004	0.213838	Up
ID_75226	ECI2	AA	0.0147434	0.0162753	0.0661636	Up
ID_88020	GBGT1	AA	0.0151335	0.0166829	0.0442694	Up
ID_71310	PRIMPOL	AA	0.0155681	0.0171219	-0.0407189	Down
ID_8366	KIRREL	AA	0.0155989	0.0171534	0.0593335	Up
ID_62858	ODF3B	AA	0.0164119	0.0179782	0.114491	Up
ID_69696	RASGEF1B	AA	0.018999	0.0205812	-0.109717	Down
ID_39385	ZNF286A	AA	0.019603	0.0211667	0.108252	Up
ID_47779	ZNF20	AA	0.0196167	0.0211757	0.0864209	Up
ID_70419	CAMK2D	AA	0.0196781	0.0212334	0.041277	Up
ID_65041	NPRL2	AA	0.0198252	0.021372	-0.0617495	Down
ID_26467	RNASE1	AA	0.0203796	0.0219076	0.0517739	Up
ID_49280	U2AF1L4	AA	0.0211637	0.0226987	0.15458	Up
ID_79119	NOD1	AA	0.0217562	0.0232936	0.113023	Up
ID_36435	IRX5	AA	0.0246226	0.026104	0.15766	Up
ID_47097	ZNF557	AA	0.0265765	0.0280639	-0.0608996	Down
ID_33457	ZNF213	AA	0.0270291	0.0284816	0.130609	Up
ID_10568	ZNF692	AA	0.0271446	0.0285927	-0.257415	Down
ID_32964	FAM173A	AA	0.0318644	0.0331059	-0.116443	Down
ID_1818	C1orf109	AA	0.0350032	0.036123	0.125403	Up
ID_8675	FCGR3A	AA	0.0382493	0.0391749	0.0460521	Up
ID_26840	DCAF11	AA	0.0386052	0.0395292	-0.0598702	Down
ID_75658	BTN3A1	AA	0.0438059	0.0443268	-0.0858716	Down
ID_61846	PATZ1	AA	0.0449612	0.0453981	0.0832145	Up
ID_42618	MSI2	AA	0.0455302	0.0459437	0.0958626	Up
ID_42189	SKAP1	AA	0.046172	0.0465092	0.0494389	Up
ID_52800	FKBP1B	AA	0.0469555	0.0472508	-0.0811994	Down
ID_77606	AKAP7	AA	0.0482626	0.048426	-0.0868437	Down
ID_44711	CEP76	AA	0.0483466	0.0484982	-0.0344962	Down
ID_29187	BDKRB2	AA	0.0496331	0.0496704	-0.0403186	Down
ID_9148	GLUL	AD	3.49982e-51	1.04472e-49	1.35132	Up
ID_41070	COASY	AD	1.635e-49	4.46417e-48	1.81007	Up
ID_2075	PPCS	AD	1.25242e-48	3.25304e-47	0.518781	Up
ID_20010	LRRC23	AD	1.40229e-34	1.78636e-33	1.37486	Up
ID_22391	SMARCC2	AD	1.07589e-32	1.26019e-31	0.635909	Up
ID_83754	FNTA	AD	1.19162e-31	1.31853e-30	0.679364	Up
ID_12645	ALDH18A1	AD	6.49518e-31	6.97469e-30	-0.182392	Down
ID_52921	MAPRE3	AD	9.52065e-30	9.3569e-29	-0.171007	Down
ID_52479	ZBTB45	AD	3.0461e-29	2.89415e-28	1.05668	Up
ID_96942	MATR3	AD	3.74472e-28	3.33977e-27	0.805709	Up
ID_29625	BRF1	AD	1.31164e-26	1.05777e-25	-0.137956	Down
ID_7562	SEMA6C	AD	2.3652e-25	1.79013e-24	0.704437	Up
ID_71962	PAIP1	AD	2.42001e-25	1.82988e-24	0.375699	Up
ID_84569	ESRP1	AD	1.42037e-24	1.03895e-23	-0.17487	Down
ID_49207	DMKN	AD	1.55445e-24	1.1336e-23	-0.272554	Down
ID_24411	IFT81	AD	2.26697e-21	1.32765e-20	0.496533	Up
ID_21745	LETMD1	AD	3.63591e-21	2.08661e-20	0.902453	Up
ID_81861	CALD1	AD	4.02656e-21	2.29925e-20	-0.199645	Down
ID_39478	NT5M	AD	1.61552e-20	8.85821e-20	0.468546	Up
ID_31688	STRA6	AD	2.17539e-20	1.18148e-19	-0.719909	Down
ID_11214	PARD3	AD	3.95462e-19	2.00361e-18	0.366396	Up
ID_76092	OARD1	AD	9.79692e-19	4.76446e-18	-0.144525	Down
ID_63187	ARPC4	AD	1.02178e-18	4.96311e-18	0.749603	Up
ID_44778	ABHD3	AD	1.73085e-18	8.27167e-18	-0.698332	Down
ID_38614	RNF167	AD	2.74433e-18	1.29909e-17	-0.17521	Down
ID_8453	DCAF8	AD	5.71822e-18	2.65655e-17	-0.202774	Down
ID_29589	C14orf79	AD	2.84313e-17	1.26011e-16	0.478187	Up
ID_21796	LETMD1	AD	1.38465e-16	5.85784e-16	0.584738	Up
ID_36399	CYLD	AD	7.00109e-16	2.83158e-15	0.48706	Up
ID_32849	LUC7L	AD	8.38385e-16	3.36532e-15	-0.906406	Down
ID_64759	IP6K2	AD	1.4627e-15	5.75582e-15	0.538338	Up
ID_65085	HEMK1	AD	1.52252e-15	5.98532e-15	0.633564	Up
ID_9461	ZC3H11A	AD	5.87181e-15	2.2116e-14	-0.253727	Down
ID_27903	PLEKHG3	AD	8.20326e-15	3.07095e-14	-0.425032	Down
ID_25137	ZNF664	AD	1.11339e-14	4.12748e-14	0.263696	Up
ID_34149	NPIPA5	AD	2.10288e-14	7.64335e-14	0.31301	Up
ID_50997	IRF3	AD	2.99673e-14	1.0741e-13	-0.308371	Down
ID_17503	IL18BP	AD	5.76057e-14	2.01067e-13	0.579795	Up
ID_32847	LUC7L	AD	6.9847e-14	2.41059e-13	-0.543083	Down
ID_83394	WHSC1L1	AD	9.08444e-14	3.10447e-13	0.382728	Up
ID_60864	ADARB1	AD	2.22208e-13	7.3762e-13	0.875749	Up
ID_66939	SLC35G2	AD	2.33057e-13	7.7235e-13	0.31567	Up
ID_30688	ARPP19	AD	3.74216e-13	1.21597e-12	0.147207	Up
ID_20847	SSPN	AD	2.40546e-12	7.29202e-12	-0.174165	Down
ID_49855	ZNF780B	AD	3.07136e-12	9.2233e-12	0.23033	Up
ID_55695	WDSUB1	AD	1.02629e-11	2.94805e-11	0.652704	Up
ID_21636	RACGAP1	AD	1.26408e-11	3.60265e-11	0.357745	Up
ID_47677	TMEM205	AD	3.70753e-11	1.0189e-10	-0.258048	Down
ID_55284	CCDC74B	AD	4.44867e-11	1.21507e-10	0.429252	Up
ID_54488	ZNF514	AD	4.49784e-11	1.22724e-10	0.320355	Up
ID_14004	PGAP2	AD	5.015e-11	1.36277e-10	0.290697	Up
ID_54629	INPP4A	AD	8.02871e-11	2.13924e-10	0.19113	Up
ID_41755	TMEM101	AD	8.86385e-11	2.35037e-10	-0.108867	Down
ID_1303	PIGV	AD	9.36175e-11	2.47584e-10	0.405114	Up
ID_82265	TMEM176A	AD	1.10681e-10	2.90026e-10	0.238192	Up
ID_89296	SPIN2B	AD	1.17428e-10	3.06402e-10	0.20557	Up
ID_90314	CXorf40A	AD	1.39584e-10	3.61968e-10	0.390756	Up
ID_56617	NABP1	AD	2.08886e-10	5.32704e-10	0.162584	Up
ID_39381	ZNF286A	AD	2.19245e-10	5.57874e-10	0.306276	Up
ID_73876	ARHGAP26	AD	2.34591e-10	5.95031e-10	0.350075	Up
ID_69233	OCIAD1	AD	2.94834e-10	7.40325e-10	-0.529508	Down
ID_39412	ZSWIM7	AD	2.99328e-10	7.50901e-10	-0.311092	Down
ID_52490	MZF1	AD	3.78383e-10	9.38623e-10	0.202436	Up
ID_33392	IL32	AD	3.97817e-10	9.85915e-10	0.215402	Up
ID_68924	PACRGL	AD	4.04525e-10	1.00099e-09	0.172906	Up
ID_33085	UNKL	AD	4.79748e-10	1.17621e-09	0.473207	Up
ID_99800	DCAF8	AD	6.4221e-10	1.55782e-09	-0.341592	Down
ID_68920	PACRGL	AD	8.25046e-10	1.98627e-09	0.135827	Up
ID_22661	DTX3	AD	2.13541e-09	4.96752e-09	0.232421	Up
ID_64279	VIPR1	AD	2.23074e-09	5.18626e-09	0.115802	Up
ID_17352	IGHMBP2	AD	2.41102e-09	5.59239e-09	0.764369	Up
ID_55537	MBD5	AD	5.63182e-09	1.26522e-08	0.227562	Up
ID_33669	CORO7	AD	6.63495e-09	1.48019e-08	-0.724366	Down
ID_64654	CCDC51	AD	8.89956e-09	1.96079e-08	0.261024	Up
ID_26928	GMPR2	AD	1.34296e-08	2.91077e-08	-0.157437	Down
ID_33439	IL32	AD	1.78334e-08	3.8269e-08	0.261475	Up
ID_59714	ZMYND8	AD	2.05407e-08	4.38049e-08	-0.225323	Down
ID_65434	RPP14	AD	2.36056e-08	4.99194e-08	-0.292381	Down
ID_41076	PSMC3IP	AD	2.43304e-08	5.14113e-08	-0.592546	Down
ID_47836	DHPS	AD	3.96918e-08	8.2029e-08	0.118295	Up
ID_2920	SPATA6	AD	3.97557e-08	8.21398e-08	0.12067	Up
ID_31228	VWA9	AD	4.52267e-08	9.29156e-08	0.305591	Up
ID_50988	IRF3	AD	5.1309e-08	1.04926e-07	-0.252644	Down
ID_24115	CHST11	AD	5.69687e-08	1.16026e-07	-0.177882	Down
ID_11963	STOX1	AD	5.80648e-08	1.18168e-07	0.0768299	Up
ID_65346	CCDC66	AD	6.56908e-08	1.33281e-07	0.117816	Up
ID_21953	CSAD	AD	8.21437e-08	1.64699e-07	0.294375	Up
ID_81133	FAM185A	AD	9.70952e-08	1.93417e-07	0.134431	Up
ID_46429	CIRBP	AD	1.16345e-07	2.2993e-07	-0.262138	Down
ID_82544	ZNF596	AD	1.2948e-07	2.5551e-07	0.187542	Up
ID_50682	PLA2G4C	AD	1.33439e-07	2.62999e-07	0.408839	Up
ID_62786	MOV10L1	AD	2.04987e-07	3.96398e-07	0.179275	Up
ID_88652	CXorf23	AD	2.26016e-07	4.34959e-07	0.259613	Up
ID_48993	ZNF302	AD	2.34816e-07	4.51028e-07	0.298502	Up
ID_33396	IL32	AD	4.88535e-07	9.13576e-07	0.180397	Up
ID_60344	EVA1C	AD	6.36469e-07	1.17783e-06	0.2451	Up
ID_67731	TTC14	AD	6.79003e-07	1.25364e-06	-0.608986	Down
ID_1564	IQCC	AD	7.35413e-07	1.35497e-06	-0.267669	Down
ID_55408	CCNT2	AD	7.43662e-07	1.36954e-06	-0.21688	Down
ID_52471	ZNF446	AD	8.43087e-07	1.54553e-06	0.278463	Up
ID_17485	IL18BP	AD	8.45774e-07	1.5501e-06	0.173662	Up
ID_15723	MADD	AD	1.09e-06	1.97957e-06	0.12874	Up
ID_9179	SMG7	AD	1.22879e-06	2.21953e-06	-0.126476	Down
ID_60642	SH3BGR	AD	1.27208e-06	2.29617e-06	0.169109	Up
ID_79118	NOD1	AD	1.97769e-06	3.5065e-06	-0.0606327	Down
ID_25922	TRIM13	AD	2.92369e-06	5.08468e-06	0.211331	Up
ID_1304	PIGV	AD	3.19944e-06	5.54616e-06	0.360729	Up
ID_13624	SIRT3	AD	3.67354e-06	6.33506e-06	0.102929	Up
ID_79195	LSM5	AD	5.02868e-06	8.5704e-06	0.432872	Up
ID_38523	CYB5D2	AD	6.43316e-06	1.08508e-05	0.226128	Up
ID_34006	CLEC16A	AD	8.29999e-06	1.38622e-05	0.173967	Up
ID_14562	SERGEF	AD	1.27357e-05	2.0861e-05	-0.23491	Down
ID_31594	ADPGK	AD	1.31614e-05	2.15165e-05	-0.33083	Down
ID_84751	GRHL2	AD	1.44217e-05	2.34308e-05	0.354471	Up
ID_47945	C19orf57	AD	1.57912e-05	2.55417e-05	0.107968	Up
ID_85620	CYHR1	AD	1.73084e-05	2.78495e-05	-0.130908	Down
ID_68551	HAUS3	AD	1.8689e-05	2.99503e-05	0.125898	Up
ID_33739	NMRAL1	AD	2.70442e-05	4.25056e-05	0.190979	Up
ID_41077	PSMC3IP	AD	2.7655e-05	4.344e-05	-0.151422	Down
ID_81336	HBP1	AD	3.37353e-05	5.24961e-05	0.255907	Up
ID_48672	GMIP	AD	3.39046e-05	5.27493e-05	0.0950442	Up
ID_56831	CASP8	AD	3.75445e-05	5.81747e-05	-0.102022	Down
ID_3709	GBP3	AD	3.98944e-05	6.16368e-05	-0.33413	Down
ID_26773	AP1G2	AD	4.09494e-05	6.31327e-05	-0.311227	Down
ID_53451	PREPL	AD	4.6367e-05	7.1047e-05	0.219404	Up
ID_21328	SLC38A1	AD	5.00121e-05	7.6288e-05	0.145227	Up
ID_48231	MYO9B	AD	5.67969e-05	8.63011e-05	-0.116402	Down
ID_62486	WBP2NL	AD	5.77241e-05	8.76434e-05	0.118403	Up
ID_516	PER3	AD	6.17403e-05	9.34928e-05	-0.112361	Down
ID_58639	TMEM230	AD	6.66113e-05	0.000100375	0.228036	Up
ID_43585	SPHK1	AD	7.58023e-05	0.000113455	-0.2037	Down
ID_18156	SYTL2	AD	8.13911e-05	0.000121298	0.21952	Up
ID_84263	HEY1	AD	8.32723e-05	0.00012394	-0.257826	Down
ID_27924	RAB15	AD	8.55363e-05	0.000127026	-0.357289	Down
ID_52383	ZNF606	AD	8.74583e-05	0.000129688	0.20276	Up
ID_77297	LAMA4	AD	9.24983e-05	0.000136882	0.153752	Up
ID_85607	VPS28	AD	0.000100391	0.000148097	-0.1382	Down
ID_44069	ENDOV	AD	0.000110925	0.000162885	-0.102214	Down
ID_80023	STX1A	AD	0.000118032	0.000172878	0.461964	Up
ID_10878	RSU1	AD	0.000140058	0.00020313	0.247446	Up
ID_13302	FGFR2	AD	0.000140607	0.000203889	0.0795869	Up
ID_7357	NBPF12	AD	0.000160975	0.000231953	-0.0617049	Down
ID_7331	NBPF11	AD	0.000177612	0.000254641	-0.056824	Down
ID_27107	HECTD1	AD	0.000233455	0.000329564	0.174791	Up
ID_88756	TAB3	AD	0.000238111	0.000335959	-0.40028	Down
ID_81137	FAM185A	AD	0.000263972	0.000370552	0.159444	Up
ID_51092	FUZ	AD	0.000269866	0.000378096	0.077863	Up
ID_28481	ZC2HC1C	AD	0.000320462	0.000445318	-0.171758	Down
ID_48190	SMIM7	AD	0.000374058	0.000515497	0.128224	Up
ID_72469	PTCD2	AD	0.000379345	0.000522513	0.201842	Up
ID_51027	IRF3	AD	0.000418024	0.000573127	-0.0410707	Down
ID_24672	FBXW8	AD	0.000436798	0.000596922	-0.135255	Down
ID_69760	LIN54	AD	0.000456586	0.000622794	0.0987741	Up
ID_2815	MKNK1	AD	0.000480582	0.000654409	0.109864	Up
ID_2953	TTC39A	AD	0.000548646	0.000742417	-1.29213	Down
ID_59553	PIGT	AD	0.000550106	0.000744266	-0.101809	Down
ID_59804	SALL4	AD	0.000573409	0.000774222	-0.0710795	Down
ID_72400	GTF2H2C	AD	0.000574303	0.000775169	0.19112	Up
ID_120575	SAT1	AD	0.000648156	0.000868405	-0.0681829	Down
ID_83881	LYN	AD	0.000771087	0.00102165	0.0575931	Up
ID_37444	ZNF23	AD	0.000780142	0.00103245	0.186273	Up
ID_93136	CSAD	AD	0.000883626	0.00116343	-0.123912	Down
ID_11514	C10orf128	AD	0.000934543	0.00122728	0.197058	Up
ID_59986	STX16	AD	0.0010022	0.00131135	-0.30906	Down
ID_66238	KIAA1407	AD	0.00105671	0.0013784	-0.289182	Down
ID_50719	CARD8	AD	0.00126635	0.00163559	0.192668	Up
ID_80450	SAMD9L	AD	0.00131697	0.00169631	0.0916819	Up
ID_65705	DHFRL1	AD	0.00132752	0.00170908	0.0826639	Up
ID_83740	SMIM19	AD	0.00134463	0.00172832	0.11891	Up
ID_12266	KAT6B	AD	0.00159952	0.00203566	0.129254	Up
ID_24684	RFC5	AD	0.00186556	0.00235402	0.144778	Up
ID_14078	TRIM5	AD	0.00211554	0.0026494	-0.0544295	Down
ID_64653	CCDC51	AD	0.00212175	0.00265675	0.111579	Up
ID_69714	TMEM150C	AD	0.00237854	0.00295242	-0.0606856	Down
ID_79025	OSBPL3	AD	0.00240003	0.00297863	-0.20519	Down
ID_63081	THUMPD3	AD	0.00254471	0.00315125	-0.146794	Down
ID_38922	ACAP1	AD	0.00258397	0.00319699	-0.0437165	Down
ID_93133	CSAD	AD	0.00270506	0.00334215	0.191681	Up
ID_28317	PTGR2	AD	0.00275806	0.00340396	-0.22955	Down
ID_66445	PARP9	AD	0.00319823	0.00391281	0.179604	Up
ID_66348	POPDC2	AD	0.00380029	0.00458834	-0.0565161	Down
ID_14003	PGAP2	AD	0.00381575	0.00460422	0.137494	Up
ID_22275	MMP19	AD	0.00417173	0.00500624	-0.306098	Down
ID_65086	HEMK1	AD	0.00421194	0.00505181	0.128226	Up
ID_22488	NACA	AD	0.0042789	0.0051275	0.185224	Up
ID_20236	CLEC2D	AD	0.00435065	0.00520725	-0.209709	Down
ID_33116	CRAMP1L	AD	0.00441605	0.00527841	0.0929867	Up
ID_75655	BTN2A2	AD	0.00450332	0.0053779	-0.0906747	Down
ID_89066	CCDC120	AD	0.00455044	0.0054293	-0.0607049	Down
ID_26765	THTPA	AD	0.00458393	0.00546683	0.290694	Up
ID_22425	PAN2	AD	0.00465134	0.00554143	0.156901	Up
ID_31209	VWA9	AD	0.00466347	0.00555506	-0.140735	Down
ID_66942	NCK1	AD	0.00516302	0.00611913	0.146218	Up
ID_50412	TRAPPC6A	AD	0.00691861	0.00805309	0.163131	Up
ID_89282	FAM104B	AD	0.00723685	0.00838933	-0.202685	Down
ID_89412	ZMYM3	AD	0.00734666	0.00850308	-0.0579924	Down
ID_60705	ABCG1	AD	0.00752346	0.00868885	-0.0951594	Down
ID_59544	DBNDD2	AD	0.00755151	0.00871836	0.098919	Up
ID_24936	DIABLO	AD	0.0077533	0.00893366	0.355764	Up
ID_21739	SLC11A2	AD	0.00793129	0.00911827	0.0991734	Up
ID_44476	ENOSF1	AD	0.00903957	0.0103206	0.180294	Up
ID_48548	SUGP2	AD	0.0117051	0.0131315	-0.147315	Down
ID_74053	TIGD6	AD	0.0132605	0.0147667	0.0562075	Up
ID_27003	KHNYN	AD	0.0138147	0.0153327	0.127885	Up
ID_64756	IP6K2	AD	0.0140147	0.0155352	0.333718	Up
ID_32309	ZSCAN2	AD	0.0141804	0.0157036	0.126609	Up
ID_44508	TGIF1	AD	0.0154797	0.0170387	0.0727818	Up
ID_33740	NMRAL1	AD	0.0161884	0.0177482	0.123494	Up
ID_88955	ZNF630	AD	0.0174373	0.0190312	-0.0466492	Down
ID_51691	ZNF415	AD	0.018341	0.0199332	0.109857	Up
ID_30696	FAM214A	AD	0.0185098	0.0201112	0.125481	Up
ID_44507	TGIF1	AD	0.0192539	0.0208291	0.12142	Up
ID_88379	CSF2RA	AD	0.0196755	0.0212334	0.0718448	Up
ID_38145	FANCA	AD	0.0197394	0.0212909	-0.153069	Down
ID_21421	PFKM	AD	0.0201178	0.0216524	0.128456	Up
ID_45149	ZNF397	AD	0.02014	0.0216734	0.0896518	Up
ID_12265	KAT6B	AD	0.0219767	0.0234983	0.0638634	Up
ID_63083	THUMPD3	AD	0.0220575	0.0235751	0.0741477	Up
ID_63294	CRELD1	AD	0.0221145	0.0236298	0.0540561	Up
ID_80157	STYXL1	AD	0.0230482	0.0245357	0.25904	Up
ID_80154	STYXL1	AD	0.0234455	0.0249189	0.166899	Up
ID_75724	ZSCAN9	AD	0.0251907	0.0266709	0.0537179	Up
ID_75774	HMGA1	AD	0.0274799	0.0288996	-0.106938	Down
ID_44790	RBBP8	AD	0.0278085	0.0291799	0.077619	Up
ID_38139	ZNF276	AD	0.0289335	0.0302534	0.0623339	Up
ID_54836	FHL2	AD	0.0297333	0.0310247	0.0795897	Up
ID_79269	ELMO1	AD	0.0301493	0.0314301	0.041321	Up
ID_65100	TEX264	AD	0.0318393	0.0330884	-0.0340447	Down
ID_88699	SAT1	AD	0.0319407	0.0331766	-0.0603155	Down
ID_72397	GTF2H2C	AD	0.0428216	0.0434351	0.119616	Up
ID_48994	ZNF302	AD	0.0430948	0.0436956	0.0975461	Up
ID_69238	OCIAD1	AD	0.0444691	0.0449353	0.141977	Up
ID_67444	MLF1	AD	0.0465604	0.0468768	0.0853367	Up
ID_85052	ZHX1	AD	0.0495267	0.0495825	0.0906729	Up
ID_11865	ARID5B	AP	3.82072e-154	6.11466e-151	-0.325346	Down
ID_11866	ARID5B	AP	3.82166e-154	6.11466e-151	2.79191	Up
ID_89246	MAGED2	AP	2.34447e-115	1.10328e-112	2.16024	Up
ID_25885	CAB39L	AP	1.14378e-106	4.25327e-104	-0.455599	Down
ID_39260	GAS7	AP	1.16965e-106	4.25327e-104	1.76955	Up
ID_25883	CAB39L	AP	1.55816e-106	5.41969e-104	1.55435	Up
ID_31676	ISLR	AP	3.93336e-95	7.87616e-93	1.43745	Up
ID_31677	ISLR	AP	3.93808e-95	7.87616e-93	-1.2316	Down
ID_17640	ARAP1	AP	8.38832e-95	1.59778e-92	-0.230931	Down
ID_59817	TSHZ2	AP	1.08735e-94	1.9775e-92	-0.885654	Down
ID_59816	TSHZ2	AP	1.08762e-94	1.9775e-92	1.4079	Up
ID_88188	EGFL7	AP	5.44754e-87	7.38649e-85	2.28898	Up
ID_17639	ARAP1	AP	2.08586e-85	2.64871e-83	1.45381	Up
ID_84754	NCALD	AP	1.00251e-82	1.05527e-80	-0.416262	Down
ID_79158	AQP1	AP	1.26815e-80	1.22232e-78	-0.175643	Down
ID_84755	NCALD	AP	1.26133e-78	1.14667e-76	2.0971	Up
ID_79310	INHBA	AP	5.20714e-77	4.47926e-75	-1.2122	Down
ID_79309	INHBA	AP	5.20714e-77	4.47926e-75	1.38844	Up
ID_79157	AQP1	AP	1.3689e-73	1.06322e-71	1.90817	Up
ID_71837	EGFLAM	AP	1.15799e-72	8.82275e-71	-0.319982	Down
ID_71836	EGFLAM	AP	2.73687e-72	2.02731e-70	2.03783	Up
ID_9389	NAV1	AP	1.89718e-71	1.35513e-69	2.43368	Up
ID_88186	EGFL7	AP	9.34822e-71	6.56015e-69	-0.307953	Down
ID_36541	CX3CL1	AP	3.12986e-65	1.855e-63	1.57968	Up
ID_36540	CX3CL1	AP	3.13031e-65	1.855e-63	-0.105739	Down
ID_54271	CAPG	AP	1.01402e-64	5.76045e-63	-0.35975	Down
ID_54272	CAPG	AP	1.01528e-64	5.76045e-63	1.01839	Up
ID_28887	FBLN5	AP	2.19858e-63	1.1753e-61	0.618559	Up
ID_28888	FBLN5	AP	2.2037e-63	1.1753e-61	-2.44266	Down
ID_40858	RARA	AP	4.1001e-63	2.14384e-61	-0.882563	Down
ID_88464	MID1	AP	2.65429e-62	1.3189e-60	1.91984	Up
ID_17681	P2RY6	AP	6.63648e-62	3.19831e-60	2.52112	Up
ID_17898	LRRC32	AP	1.3562e-60	6.3092e-59	1.22025	Up
ID_17897	LRRC32	AP	1.35648e-60	6.3092e-59	-0.461919	Down
ID_77982	PHACTR2	AP	3.80958e-60	1.74152e-58	2.12704	Up
ID_24277	UNG	AP	5.97004e-60	2.66926e-58	1.89727	Up
ID_24278	UNG	AP	5.97248e-60	2.66926e-58	-0.315839	Down
ID_45652	NEDD4L	AP	5.0245e-59	2.17276e-57	2.37296	Up
ID_26985	NFATC4	AP	1.01855e-57	4.24396e-56	2.7019	Up
ID_57460	PNKD	AP	3.87232e-57	1.59683e-55	-0.161537	Down
ID_57461	PNKD	AP	4.14291e-57	1.69965e-55	1.78183	Up
ID_18039	RAB30	AP	4.01932e-56	1.55336e-54	-2.43043	Down
ID_15692	NR1H3	AP	3.657e-55	1.33589e-53	1.16129	Up
ID_50210	PINLYP	AP	4.08198e-55	1.47764e-53	2.15877	Up
ID_79270	EPDR1	AP	6.39189e-55	2.27267e-53	2.66616	Up
ID_40367	CCL14	AP	7.87585e-54	2.68313e-52	-0.125752	Down
ID_40366	CCL14	AP	7.8817e-54	2.68313e-52	3.53863	Up
ID_79272	EPDR1	AP	1.09264e-52	3.51048e-51	-0.206915	Down
ID_76398	RUNX2	AP	1.10901e-52	3.53472e-51	-1.19336	Down
ID_76399	RUNX2	AP	1.10902e-52	3.53472e-51	1.5201	Up
ID_70976	FAM198B	AP	1.93558e-52	6.07242e-51	-0.361463	Down
ID_70975	FAM198B	AP	1.94543e-52	6.07947e-51	0.961311	Up
ID_39261	GAS7	AP	4.63037e-51	1.37706e-49	-1.66484	Down
ID_72276	MAST4	AP	5.3034e-51	1.57138e-49	1.57413	Up
ID_87400	PHF19	AP	1.5516e-49	4.25669e-48	-1.40852	Down
ID_87399	PHF19	AP	1.55369e-49	4.25669e-48	1.07757	Up
ID_59996	GNAS	AP	2.77984e-49	7.48778e-48	-1.167	Down
ID_3795	BCAR3	AP	4.36552e-49	1.16414e-47	-0.688429	Down
ID_60874	COL18A1	AP	3.13177e-48	8.05601e-47	2.3725	Up
ID_60875	COL18A1	AP	3.14239e-48	8.05741e-47	-0.190091	Down
ID_18040	RAB30	AP	4.01612e-47	9.94706e-46	0.454722	Up
ID_42073	NPEPPS	AP	1.99428e-46	4.73419e-45	3.29577	Up
ID_76154	CCND3	AP	2.29528e-46	5.43261e-45	1.25995	Up
ID_18693	CRYAB	AP	2.89647e-46	6.81523e-45	-0.905563	Down
ID_13865	LSP1	AP	4.66707e-46	1.09171e-44	1.07256	Up
ID_77989	PLAGL1	AP	1.09671e-45	2.52117e-44	1.96543	Up
ID_26318	MCF2L	AP	1.19099e-45	2.73006e-44	1.36447	Up
ID_84673	COX6C	AP	1.29092e-45	2.95066e-44	-0.287619	Down
ID_63743	RARB	AP	1.04084e-44	2.27507e-43	2.42226	Up
ID_34068	MKL2	AP	1.57466e-44	3.3955e-43	-1.35956	Down
ID_18691	CRYAB	AP	6.38861e-44	1.33444e-42	0.607222	Up
ID_10675	IL15RA	AP	1.84131e-43	3.79425e-42	0.875722	Up
ID_10674	IL15RA	AP	1.84495e-43	3.79425e-42	-0.305921	Down
ID_78781	ICA1	AP	2.21733e-43	4.52516e-42	0.950229	Up
ID_13080	MXI1	AP	3.34794e-43	6.71267e-42	0.995614	Up
ID_84675	COX6C	AP	3.97852e-43	7.91745e-42	1.15833	Up
ID_68594	SH3BP2	AP	4.34657e-43	8.62843e-42	1.57056	Up
ID_13867	LSP1	AP	9.15796e-43	1.79568e-41	-2.85173	Down
ID_16403	BSCL2	AP	4.55732e-42	8.65999e-41	-0.554559	Down
ID_785	HSPB7	AP	6.13348e-42	1.14922e-40	1.86488	Up
ID_786	HSPB7	AP	6.13396e-42	1.14922e-40	-0.341191	Down
ID_11231	CREM	AP	6.70256e-42	1.24989e-40	-0.713499	Down
ID_40857	RARA	AP	6.63697e-41	1.18253e-39	0.390196	Up
ID_59995	GNAS	AP	7.68274e-41	1.36279e-39	1.94442	Up
ID_44300	SLC16A3	AP	3.18782e-40	5.48442e-39	1.6357	Up
ID_65390	SLMAP	AP	3.45662e-40	5.92141e-39	1.00873	Up
ID_87549	RABEPK	AP	5.05891e-40	8.49174e-39	-0.256303	Down
ID_87550	RABEPK	AP	5.0632e-40	8.49174e-39	0.850664	Up
ID_77983	PHACTR2	AP	7.6969e-40	1.27749e-38	-0.163843	Down
ID_76156	CCND3	AP	9.402e-40	1.55727e-38	-0.644979	Down
ID_54881	LIMS1	AP	3.23158e-39	5.27604e-38	1.38254	Up
ID_65389	SLMAP	AP	3.95261e-39	6.37517e-38	-1.91926	Down
ID_66989	MRAS	AP	8.43731e-39	1.33926e-37	0.76639	Up
ID_60587	ERG	AP	1.55209e-38	2.42042e-37	1.74563	Up
ID_544	RERE	AP	2.63027e-38	4.0388e-37	0.726293	Up
ID_68070	RPL39L	AP	4.39668e-38	6.65095e-37	-0.744084	Down
ID_68071	RPL39L	AP	4.39794e-38	6.65095e-37	0.626531	Up
ID_14328	WEE1	AP	1.62012e-37	2.37838e-36	0.396409	Up
ID_14327	WEE1	AP	1.62027e-37	2.37838e-36	-1.0467	Down
ID_70168	SLC9B2	AP	3.38601e-37	4.90727e-36	2.77211	Up
ID_16400	BSCL2	AP	1.04637e-36	1.48685e-35	0.737035	Up
ID_71271	ING2	AP	1.08524e-36	1.53662e-35	0.440578	Up
ID_71272	ING2	AP	1.08524e-36	1.53662e-35	-0.61954	Down
ID_29956	PAK6	AP	1.58787e-36	2.24038e-35	0.738435	Up
ID_3796	BCAR3	AP	1.84127e-36	2.58878e-35	0.938219	Up
ID_63061	SSUH2	AP	2.30624e-36	3.23117e-35	-0.431952	Down
ID_29958	PAK6	AP	4.586e-36	6.31464e-35	-2.33061	Down
ID_81804	MEST	AP	1.04547e-35	1.41759e-34	-1.35663	Down
ID_81803	MEST	AP	1.65738e-35	2.21723e-34	0.890953	Up
ID_54884	LIMS1	AP	1.80653e-35	2.4087e-34	-1.04066	Down
ID_2783	POMGNT1	AP	5.93491e-35	7.78349e-34	-0.936133	Down
ID_15540	DGKZ	AP	6.53428e-35	8.55552e-34	0.591411	Up
ID_28310	ELMSAN1	AP	6.8533e-35	8.9458e-34	0.728368	Up
ID_28311	ELMSAN1	AP	6.85472e-35	8.9458e-34	-0.473838	Down
ID_34067	MKL2	AP	1.25335e-34	1.60428e-33	0.888674	Up
ID_78784	ICA1	AP	1.30174e-34	1.66091e-33	-0.620085	Down
ID_19605	NINJ2	AP	1.50062e-34	1.90857e-33	-0.132351	Down
ID_22211	ITGA7	AP	4.88968e-34	6.13127e-33	1.44937	Up
ID_587	LZIC	AP	5.542e-34	6.92853e-33	0.470449	Up
ID_586	LZIC	AP	5.54282e-34	6.92853e-33	-0.370547	Down
ID_2781	POMGNT1	AP	1.02677e-33	1.26567e-32	0.379001	Up
ID_3739	TGFBR3	AP	2.69574e-33	3.26756e-32	-0.746172	Down
ID_13651	SIGIRR	AP	1.0311e-32	1.21487e-31	0.946205	Up
ID_13650	SIGIRR	AP	1.03112e-32	1.21487e-31	-0.971567	Down
ID_87421	GSN	AP	1.07546e-32	1.26019e-31	0.654843	Up
ID_49541	ZNF540	AP	1.6465e-32	1.91176e-31	-0.201475	Down
ID_71959	PAIP1	AP	1.96239e-32	2.26632e-31	-0.21605	Down
ID_71958	PAIP1	AP	1.9632e-32	2.26632e-31	1.06352	Up
ID_69814	ARHGAP24	AP	2.0074e-32	2.31067e-31	-0.576276	Down
ID_15541	DGKZ	AP	2.04564e-32	2.34793e-31	-0.860929	Down
ID_47947	PODNL1	AP	2.86479e-32	3.27404e-31	1.00292	Up
ID_77528	EPB41L2	AP	3.2678e-32	3.72041e-31	0.538019	Up
ID_49542	ZNF540	AP	4.64065e-32	5.22155e-31	1.30723	Up
ID_69813	ARHGAP24	AP	9.29098e-32	1.03955e-30	0.845293	Up
ID_63869	CLASP2	AP	1.20861e-31	1.33548e-30	-1.95891	Down
ID_47949	PODNL1	AP	1.4762e-31	1.62667e-30	-0.791083	Down
ID_7732	S100A13	AP	1.91677e-31	2.10057e-30	0.659872	Up
ID_87422	GSN	AP	3.85063e-31	4.17412e-30	-2.29633	Down
ID_13410	CTBP2	AP	4.33634e-31	4.69428e-30	0.435251	Up
ID_62255	SUN2	AP	6.09288e-31	6.5603e-30	-0.42144	Down
ID_84103	SULF1	AP	1.15529e-30	1.22267e-29	-0.341231	Down
ID_84104	SULF1	AP	1.15543e-30	1.22267e-29	0.98427	Up
ID_63872	CLASP2	AP	1.23442e-30	1.30282e-29	0.488315	Up
ID_55613	NR4A2	AP	1.49922e-30	1.56576e-29	1.17254	Up
ID_26619	SLC7A7	AP	2.17017e-30	2.249e-29	0.370343	Up
ID_26621	SLC7A7	AP	2.17028e-30	2.249e-29	-0.941505	Down
ID_63744	RARB	AP	2.93022e-30	2.99101e-29	-0.127214	Down
ID_72278	MAST4	AP	3.66125e-30	3.71701e-29	-1.17957	Down
ID_17643	STARD10	AP	3.74953e-30	3.7976e-29	-1.2441	Down
ID_17644	STARD10	AP	3.75013e-30	3.7976e-29	0.680476	Up
ID_84860	ANGPT1	AP	9.03726e-30	8.9041e-29	-0.622743	Down
ID_84859	ANGPT1	AP	9.03766e-30	8.9041e-29	0.632809	Up
ID_3858	SLC35A3	AP	2.4516e-29	2.35205e-28	-0.359826	Down
ID_3859	SLC35A3	AP	2.45201e-29	2.35205e-28	0.971025	Up
ID_28507	FLVCR2	AP	2.64938e-29	2.52924e-28	2.30969	Up
ID_70167	SLC9B2	AP	3.42589e-29	3.24729e-28	-0.288869	Down
ID_60627	WRB	AP	3.55502e-29	3.36224e-28	1.00799	Up
ID_60626	WRB	AP	3.55557e-29	3.36224e-28	-0.120552	Down
ID_3524	AK5	AP	3.8169e-29	3.60085e-28	1.44613	Up
ID_62257	SUN2	AP	4.19196e-29	3.94074e-28	0.670098	Up
ID_77428	NCOA7	AP	6.34951e-29	5.92135e-28	1.0602	Up
ID_77427	NCOA7	AP	6.35064e-29	5.92135e-28	-0.360747	Down
ID_37689	DYNLRB2	AP	1.01105e-28	9.31032e-28	-0.247308	Down
ID_37688	DYNLRB2	AP	1.01133e-28	9.31032e-28	1.04644	Up
ID_38196	DBNDD1	AP	1.65909e-28	1.5117e-27	-0.255128	Down
ID_88593	RAI2	AP	2.32744e-28	2.09505e-27	0.729595	Up
ID_88592	RAI2	AP	2.32812e-28	2.09505e-27	-0.150816	Down
ID_3523	AK5	AP	4.89801e-28	4.35379e-27	-0.763655	Down
ID_33077	UNKL	AP	1.05581e-27	9.19243e-27	1.55439	Up
ID_33078	UNKL	AP	1.05598e-27	9.19243e-27	-0.241638	Down
ID_43135	ARSG	AP	1.46137e-27	1.25309e-26	-1.22702	Down
ID_43136	ARSG	AP	1.46141e-27	1.25309e-26	0.788295	Up
ID_13458	PTPRE	AP	1.7598e-27	1.5025e-26	0.939792	Up
ID_44877	OSBPL1A	AP	2.14464e-27	1.82523e-26	-0.544573	Down
ID_52946	SLC5A6	AP	2.1571e-27	1.83388e-26	0.657677	Up
ID_12652	ENTPD1	AP	2.25265e-27	1.90499e-26	-1.06053	Down
ID_44876	OSBPL1A	AP	2.49325e-27	2.10623e-26	0.550445	Up
ID_2946	TTC39A	AP	8.61302e-27	7.10352e-26	0.630007	Up
ID_11229	CREM	AP	9.78981e-27	8.04091e-26	0.748805	Up
ID_76428	GPR116	AP	1.519e-26	1.21897e-25	0.534151	Up
ID_76427	GPR116	AP	1.51914e-26	1.21897e-25	-0.278927	Down
ID_62422	TEF	AP	2.14904e-26	1.7158e-25	-1.0083	Down
ID_62421	TEF	AP	2.14904e-26	1.7158e-25	0.504367	Up
ID_42864	BCAS3	AP	2.64138e-26	2.09894e-25	-0.532102	Down
ID_42865	BCAS3	AP	2.64204e-26	2.09894e-25	0.462353	Up
ID_72279	MAST4	AP	3.80423e-26	3.01325e-25	1.22992	Up
ID_44787	RBBP8	AP	6.23721e-26	4.89193e-25	0.6465	Up
ID_63056	SSUH2	AP	7.1525e-26	5.58789e-25	0.493682	Up
ID_65791	ST3GAL6	AP	7.4742e-26	5.83352e-25	0.773511	Up
ID_71123	PALLD	AP	7.78835e-26	6.06688e-25	0.637614	Up
ID_45493	MYO5B	AP	8.40042e-26	6.53501e-25	1.25889	Up
ID_45495	MYO5B	AP	8.40566e-26	6.53501e-25	-0.215717	Down
ID_45092	DTNA	AP	8.68612e-26	6.7465e-25	-2.4344	Down
ID_75298	GCNT2	AP	9.27393e-26	7.18213e-25	0.667621	Up
ID_38197	DBNDD1	AP	9.90383e-26	7.64774e-25	1.08582	Up
ID_9688	HHAT	AP	1.44235e-25	1.10631e-24	-1.12234	Down
ID_83211	ZNF395	AP	1.63867e-25	1.25448e-24	1.16847	Up
ID_51134	ATF5	AP	1.73517e-25	1.32376e-24	0.686294	Up
ID_51133	ATF5	AP	1.73577e-25	1.32376e-24	-0.274249	Down
ID_54657	TSGA10	AP	1.76475e-25	1.34457e-24	1.02673	Up
ID_26317	MCF2L	AP	2.13733e-25	1.62534e-24	-1.00078	Down
ID_73018	TRIM36	AP	3.26361e-25	2.45615e-24	0.627751	Up
ID_73017	TRIM36	AP	3.26361e-25	2.45615e-24	-0.957081	Down
ID_13412	CTBP2	AP	4.05376e-25	3.03652e-24	-0.864556	Down
ID_57885	SP140L	AP	6.83064e-25	5.0601e-24	-0.271533	Down
ID_57884	SP140L	AP	6.83113e-25	5.0601e-24	0.695436	Up
ID_12653	ENTPD1	AP	9.82854e-25	7.26023e-24	0.303546	Up
ID_44738	LDLRAD4	AP	1.27002e-24	9.34698e-24	-0.473314	Down
ID_76415	RCAN2	AP	1.67301e-24	1.21673e-23	0.758078	Up
ID_54051	C2orf81	AP	1.73542e-24	1.2578e-23	-0.509118	Down
ID_54050	C2orf81	AP	1.73576e-24	1.2578e-23	0.489334	Up
ID_45089	DTNA	AP	2.0311e-24	1.46518e-23	0.581634	Up
ID_13488	LRRC27	AP	2.63012e-24	1.88034e-23	0.864994	Up
ID_88097	OLFM1	AP	3.94703e-24	2.80429e-23	-0.220287	Down
ID_60878	SLC19A1	AP	4.22187e-24	2.99423e-23	0.502523	Up
ID_3793	BCAR3	AP	4.67489e-24	3.30381e-23	0.917723	Up
ID_88099	OLFM1	AP	9.59752e-24	6.68817e-23	0.664861	Up
ID_83149	PTK2B	AP	1.00615e-23	6.99325e-23	-0.294828	Down
ID_52760	SDC1	AP	1.26115e-23	8.69807e-23	-0.446629	Down
ID_52759	SDC1	AP	1.26122e-23	8.69807e-23	0.490027	Up
ID_83150	PTK2B	AP	1.66736e-23	1.14203e-22	0.725163	Up
ID_9485	LRRN2	AP	1.68004e-23	1.14973e-22	1.12639	Up
ID_9486	LRRN2	AP	1.68299e-23	1.15076e-22	-0.191318	Down
ID_38627	CAMTA2	AP	2.6403e-23	1.76581e-22	0.753397	Up
ID_38629	CAMTA2	AP	2.64519e-23	1.7664e-22	-0.10539	Down
ID_77529	EPB41L2	AP	2.66002e-23	1.77482e-22	-1.32084	Down
ID_22414	COQ10A	AP	2.67083e-23	1.78055e-22	0.509962	Up
ID_7601	RFX5	AP	4.5882e-23	3.01112e-22	0.756648	Up
ID_26912	GMPR2	AP	4.70322e-23	3.08272e-22	0.273564	Up
ID_26913	GMPR2	AP	4.70499e-23	3.08272e-22	-0.36456	Down
ID_84721	YWHAZ	AP	5.17314e-23	3.38114e-22	-0.249545	Down
ID_60589	ERG	AP	6.12079e-23	3.98424e-22	-0.164593	Down
ID_82413	KMT2C	AP	7.51625e-23	4.85086e-22	0.420066	Up
ID_82412	KMT2C	AP	7.51884e-23	4.85086e-22	-0.330912	Down
ID_15694	NR1H3	AP	1.18028e-22	7.55382e-22	-0.890634	Down
ID_26796	DHRS4L2	AP	1.80934e-22	1.14795e-21	0.639696	Up
ID_26795	DHRS4L2	AP	1.80946e-22	1.14795e-21	-0.230773	Down
ID_13079	MXI1	AP	2.06687e-22	1.30505e-21	-0.250686	Down
ID_21359	SLC48A1	AP	2.47179e-22	1.5558e-21	-0.667987	Down
ID_21358	SLC48A1	AP	3.04673e-22	1.90718e-21	0.200838	Up
ID_55614	NR4A2	AP	3.60961e-22	2.23852e-21	-0.425202	Down
ID_43701	SEC14L1	AP	4.25392e-22	2.6279e-21	-0.446515	Down
ID_8438	DCAF8	AP	4.28745e-22	2.64476e-21	0.374054	Up
ID_8436	DCAF8	AP	4.28781e-22	2.64476e-21	-0.240624	Down
ID_9193	RGL1	AP	5.45119e-22	3.34177e-21	-0.133814	Down
ID_9194	RGL1	AP	5.45126e-22	3.34177e-21	0.861519	Up
ID_86745	GOLM1	AP	8.73411e-22	5.30196e-21	-0.341181	Down
ID_86743	GOLM1	AP	8.73498e-22	5.30196e-21	0.596142	Up
ID_14000	PGAP2	AP	9.99169e-22	6.03272e-21	0.414787	Up
ID_22415	COQ10A	AP	1.07402e-21	6.46028e-21	-0.498785	Down
ID_13457	PTPRE	AP	1.10559e-21	6.63517e-21	-0.334819	Down
ID_78163	ESR1	AP	1.14656e-21	6.87591e-21	0.483975	Up
ID_81278	SRPK2	AP	1.46474e-21	8.68109e-21	-0.432139	Down
ID_81276	SRPK2	AP	1.49078e-21	8.82117e-21	0.435519	Up
ID_14002	PGAP2	AP	1.54586e-21	9.14034e-21	-0.264821	Down
ID_32837	LUC7L	AP	1.58889e-21	9.3841e-21	-0.381043	Down
ID_32836	LUC7L	AP	1.58943e-21	9.3841e-21	0.502156	Up
ID_66941	NCK1	AP	2.05368e-21	1.20473e-20	-0.56344	Down
ID_66940	NCK1	AP	2.05406e-21	1.20473e-20	0.388618	Up
ID_84724	YWHAZ	AP	2.42146e-21	1.41606e-20	0.383225	Up
ID_44301	SLC16A3	AP	2.64802e-21	1.54403e-20	-0.571246	Down
ID_59997	GNAS	AP	3.35266e-21	1.93376e-20	1.31863	Up
ID_65789	ST3GAL6	AP	3.38573e-21	1.95143e-20	-0.658843	Down
ID_19408	ETS1	AP	3.62155e-21	2.08063e-20	0.61615	Up
ID_19409	ETS1	AP	3.62289e-21	2.08063e-20	-0.108838	Down
ID_27373	CTAGE5	AP	3.76445e-21	2.15882e-20	0.425264	Up
ID_83210	ZNF395	AP	3.92409e-21	2.24554e-20	-0.309427	Down
ID_35938	MAZ	AP	4.85744e-21	2.76777e-20	0.310593	Up
ID_38659	USP6	AP	5.15223e-21	2.9274e-20	0.384121	Up
ID_38660	USP6	AP	5.15223e-21	2.9274e-20	-1.92786	Down
ID_69839	C4orf36	AP	5.96667e-21	3.37816e-20	-0.173176	Down
ID_69838	C4orf36	AP	5.96667e-21	3.37816e-20	0.892438	Up
ID_75295	GCNT2	AP	7.22677e-21	4.06569e-20	-1.05733	Down
ID_90029	STAG2	AP	7.57522e-21	4.25574e-20	0.27872	Up
ID_466	PLEKHG5	AP	1.02522e-20	5.69965e-20	-1.03488	Down
ID_38952	FGF11	AP	1.33908e-20	7.37275e-20	0.791454	Up
ID_225	NADK	AP	1.70398e-20	9.33051e-20	-0.402148	Down
ID_52947	SLC5A6	AP	2.02322e-20	1.10333e-19	-0.753494	Down
ID_47747	ACP5	AP	2.81502e-20	1.5249e-19	0.446649	Up
ID_47745	ACP5	AP	2.81535e-20	1.5249e-19	-1.00651	Down
ID_64265	TRAK1	AP	2.89378e-20	1.56179e-19	-1.84725	Down
ID_54148	EVA1A	AP	3.23638e-20	1.74233e-19	1.00293	Up
ID_3741	TGFBR3	AP	3.76697e-20	2.01577e-19	0.446733	Up
ID_18688	C11orf1	AP	3.98796e-20	2.12691e-19	-0.164901	Down
ID_69600	FAM47E	AP	5.17681e-20	2.74997e-19	0.67885	Up
ID_69599	FAM47E	AP	5.18216e-20	2.75098e-19	-0.24155	Down
ID_45649	NEDD4L	AP	7.42163e-20	3.91384e-19	-1.02562	Down
ID_60030	FAM217B	AP	8.02202e-20	4.21982e-19	-0.226426	Down
ID_60031	FAM217B	AP	8.02293e-20	4.21982e-19	1.06649	Up
ID_64266	TRAK1	AP	9.80494e-20	5.12677e-19	0.456783	Up
ID_43983	C1QTNF1	AP	1.03033e-19	5.37679e-19	0.604837	Up
ID_65594	FOXP1	AP	1.22006e-19	6.32564e-19	0.955694	Up
ID_21887	NR4A1	AP	1.31048e-19	6.78565e-19	0.988608	Up
ID_73442	H2AFY	AP	1.47237e-19	7.57536e-19	0.318657	Up
ID_73443	H2AFY	AP	1.47246e-19	7.57536e-19	-1.69165	Down
ID_61340	SLC2A11	AP	2.43003e-19	1.24537e-18	0.570087	Up
ID_82848	NAT1	AP	3.2029e-19	1.63205e-18	1.47915	Up
ID_82869	SH2D4A	AP	3.28181e-19	1.67027e-18	-0.689421	Down
ID_82870	SH2D4A	AP	3.28209e-19	1.67027e-18	0.535253	Up
ID_21884	NR4A1	AP	3.67788e-19	1.86694e-18	-0.289916	Down
ID_541	RERE	AP	3.79893e-19	1.92595e-18	-0.453989	Down
ID_49821	PLEKHG2	AP	4.36944e-19	2.20401e-18	0.231291	Up
ID_49822	PLEKHG2	AP	4.3723e-19	2.20406e-18	-0.632483	Down
ID_54150	EVA1A	AP	4.37715e-19	2.20511e-18	-0.236632	Down
ID_24976	KNTC1	AP	4.57048e-19	2.29817e-18	1.05635	Up
ID_23707	SOCS2	AP	5.12509e-19	2.56897e-18	0.55194	Up
ID_12541	EXOC6	AP	5.71056e-19	2.85016e-18	-2.12895	Down
ID_12540	EXOC6	AP	5.711e-19	2.85016e-18	0.29195	Up
ID_18686	C11orf1	AP	6.41891e-19	3.19548e-18	0.504722	Up
ID_62846	SCO2	AP	6.65425e-19	3.29826e-18	-0.184826	Down
ID_78120	LRP11	AP	6.73054e-19	3.3322e-18	0.591433	Up
ID_78119	LRP11	AP	6.73105e-19	3.3322e-18	-0.548613	Down
ID_40638	FBXL20	AP	6.98219e-19	3.45032e-18	0.765236	Up
ID_40639	FBXL20	AP	6.98259e-19	3.45032e-18	-0.305726	Down
ID_68090	TPRG1	AP	7.15926e-19	3.52699e-18	-1.15713	Down
ID_68091	TPRG1	AP	7.15979e-19	3.52699e-18	0.785293	Up
ID_45610	TCF4	AP	1.04516e-18	5.07053e-18	0.39837	Up
ID_88261	NPDC1	AP	1.13733e-18	5.4916e-18	0.478021	Up
ID_88260	NPDC1	AP	1.13745e-18	5.4916e-18	-0.363849	Down
ID_95207	CNTD2	AP	1.29472e-18	6.23292e-18	-0.278499	Down
ID_95208	CNTD2	AP	1.29489e-18	6.23292e-18	0.836194	Up
ID_52345	ZNF587B	AP	1.44354e-18	6.93478e-18	-1.89816	Down
ID_52344	ZNF587B	AP	1.44417e-18	6.93478e-18	0.276684	Up
ID_43703	SEC14L1	AP	1.50536e-18	7.22428e-18	0.463697	Up
ID_61518	TPST2	AP	2.259e-18	1.07635e-17	-2.08023	Down
ID_61516	TPST2	AP	2.30674e-18	1.09845e-17	0.246559	Up
ID_67466	SCHIP1	AP	2.33937e-18	1.11253e-17	-1.07545	Down
ID_67467	SCHIP1	AP	2.34049e-18	1.11253e-17	0.585755	Up
ID_17682	P2RY6	AP	2.54532e-18	1.20775e-17	-0.824839	Down
ID_26314	MCF2L	AP	3.29143e-18	1.55165e-17	0.937605	Up
ID_13935	SLC22A18	AP	3.56012e-18	1.67535e-17	-0.208633	Down
ID_18690	CRYAB	AP	3.7613e-18	1.76691e-17	0.392924	Up
ID_66988	MRAS	AP	3.97673e-18	1.86592e-17	-0.834417	Down
ID_11334	ZNF239	AP	6.70465e-18	3.092e-17	0.647661	Up
ID_11333	ZNF239	AP	6.70578e-18	3.092e-17	-0.275208	Down
ID_13076	ADD3	AP	7.34639e-18	3.38154e-17	-0.62965	Down
ID_13075	ADD3	AP	7.35094e-18	3.38169e-17	0.336222	Up
ID_61339	SLC2A11	AP	7.78415e-18	3.57276e-17	-0.216387	Down
ID_87175	AKAP2	AP	8.24923e-18	3.77755e-17	0.491655	Up
ID_62847	SCO2	AP	9.01548e-18	4.12136e-17	0.665897	Up
ID_36426	FTO	AP	1.20982e-17	5.48671e-17	2.98763	Up
ID_9691	HHAT	AP	1.4514e-17	6.5563e-17	0.881257	Up
ID_89297	SPIN2A	AP	1.53928e-17	6.94565e-17	0.395798	Up
ID_89298	SPIN2A	AP	1.53933e-17	6.94565e-17	-1.08327	Down
ID_82851	NAT1	AP	1.55639e-17	7.01867e-17	-0.0691743	Down
ID_34066	MKL2	AP	1.79406e-17	8.0451e-17	0.904271	Up
ID_88463	MID1	AP	1.8045e-17	8.08739e-17	-0.733893	Down
ID_34391	ERI2	AP	2.12647e-17	9.47204e-17	-0.490269	Down
ID_34390	ERI2	AP	2.12647e-17	9.47204e-17	0.410775	Up
ID_4221	MOV10	AP	2.30944e-17	1.02704e-16	-0.30087	Down
ID_4222	MOV10	AP	2.30956e-17	1.02704e-16	0.543594	Up
ID_736	TMEM51	AP	2.98195e-17	1.3195e-16	0.509924	Up
ID_737	TMEM51	AP	2.98207e-17	1.3195e-16	-0.254257	Down
ID_81529	CAV1	AP	3.803e-17	1.67074e-16	0.401275	Up
ID_81528	CAV1	AP	3.80302e-17	1.67074e-16	-0.120827	Down
ID_1860	RHBDL2	AP	3.85611e-17	1.69313e-16	-0.61774	Down
ID_82607	SOX7	AP	5.86593e-17	2.54228e-16	0.280109	Up
ID_82608	SOX7	AP	5.87327e-17	2.54392e-16	-0.477779	Down
ID_58466	FAM110A	AP	6.50341e-17	2.80622e-16	0.824657	Up
ID_1859	RHBDL2	AP	7.2301e-17	3.10805e-16	0.550228	Up
ID_3657	DDAH1	AP	1.1887e-16	5.06098e-16	-0.764831	Down
ID_44684	SLMO1	AP	1.88759e-16	7.92271e-16	-0.248685	Down
ID_81315	CDHR3	AP	2.77053e-16	1.15079e-15	1.07904	Up
ID_81316	CDHR3	AP	2.77053e-16	1.15079e-15	-0.343469	Down
ID_16009	LPXN	AP	3.14091e-16	1.30066e-15	-0.715318	Down
ID_16010	LPXN	AP	3.14108e-16	1.30066e-15	0.188677	Up
ID_41827	UBTF	AP	3.18128e-16	1.31594e-15	-0.235262	Down
ID_86937	FBP1	AP	3.66126e-16	1.50761e-15	-0.659205	Down
ID_86936	FBP1	AP	3.66161e-16	1.50761e-15	0.243645	Up
ID_53030	CCDC121	AP	4.37852e-16	1.79631e-15	-0.134513	Down
ID_53029	CCDC121	AP	4.38085e-16	1.79635e-15	0.623746	Up
ID_29358	MOK	AP	4.72085e-16	1.92885e-15	0.358246	Up
ID_16988	KLC2	AP	5.15208e-16	2.09861e-15	0.349176	Up
ID_32900	PIGQ	AP	6.72518e-16	2.72137e-15	0.422541	Up
ID_29362	MOK	AP	7.06151e-16	2.85458e-15	-1.13777	Down
ID_14261	ST5	AP	7.83695e-16	3.15688e-15	1.38631	Up
ID_89245	MAGED2	AP	8.26982e-16	3.32622e-15	-0.549695	Down
ID_60090	DIDO1	AP	8.34913e-16	3.35432e-15	0.28556	Up
ID_60089	DIDO1	AP	8.35227e-16	3.35432e-15	-0.143814	Down
ID_22867	TBC1D30	AP	8.73233e-16	3.49643e-15	1.62188	Up
ID_22868	TBC1D30	AP	8.73233e-16	3.49643e-15	-0.0923827	Down
ID_48388	ARRDC2	AP	1.0158e-15	4.05056e-15	0.53014	Up
ID_48387	ARRDC2	AP	1.01618e-15	4.05056e-15	-0.203447	Down
ID_44685	SLMO1	AP	1.02322e-15	4.07659e-15	0.800196	Up
ID_39501	SREBF1	AP	1.03628e-15	4.12279e-15	-0.543638	Down
ID_39500	SREBF1	AP	1.03637e-15	4.12279e-15	0.308277	Up
ID_62645	KIAA0930	AP	1.07951e-15	4.28377e-15	-0.700738	Down
ID_42604	AKAP1	AP	1.17307e-15	4.64122e-15	0.267724	Up
ID_82114	ZYX	AP	1.22653e-15	4.84793e-15	-0.573484	Down
ID_82115	ZYX	AP	1.22653e-15	4.84793e-15	0.464833	Up
ID_78244	SYNJ2	AP	1.24486e-15	4.91796e-15	0.673839	Up
ID_58467	FAM110A	AP	1.39993e-15	5.51695e-15	-0.333677	Down
ID_43216	C17orf80	AP	1.7055e-15	6.69153e-15	0.44805	Up
ID_43218	C17orf80	AP	1.7055e-15	6.69153e-15	-0.252687	Down
ID_70920	GUCY1A3	AP	1.79021e-15	7.02045e-15	-0.165775	Down
ID_32898	PIGQ	AP	1.87117e-15	7.3164e-15	-0.709974	Down
ID_85291	PTK2	AP	2.05623e-15	8.02039e-15	-0.851554	Down
ID_87992	C9orf9	AP	2.17038e-15	8.43783e-15	-0.290729	Down
ID_87993	C9orf9	AP	2.17063e-15	8.43783e-15	0.330829	Up
ID_45650	NEDD4L	AP	2.28687e-15	8.87673e-15	-0.993167	Down
ID_58600	CDC25B	AP	2.3453e-15	9.09132e-15	0.180966	Up
ID_58601	CDC25B	AP	2.34556e-15	9.09132e-15	-0.917783	Down
ID_55227	LIMS2	AP	2.46556e-15	9.55179e-15	0.295421	Up
ID_9895	BROX	AP	3.50766e-15	1.34265e-14	0.471265	Up
ID_9894	BROX	AP	3.50768e-15	1.34265e-14	-0.275769	Down
ID_50099	ARHGEF1	AP	4.11565e-15	1.56864e-14	0.411137	Up
ID_50098	ARHGEF1	AP	4.11573e-15	1.56864e-14	-0.272838	Down
ID_74322	CYFIP2	AP	4.24632e-15	1.61765e-14	0.524677	Up
ID_22295	DGKA	AP	4.76979e-15	1.81103e-14	0.334695	Up
ID_9585	RASSF5	AP	5.23614e-15	1.98057e-14	-0.85237	Down
ID_9586	RASSF5	AP	5.23614e-15	1.98057e-14	0.172618	Up
ID_13896	IGF2	AP	6.78759e-15	2.54933e-14	-0.239757	Down
ID_71121	PALLD	AP	8.39504e-15	3.14127e-14	-0.364806	Down
ID_62646	KIAA0930	AP	1.10122e-14	4.08617e-14	0.22815	Up
ID_70922	GUCY1A3	AP	1.15833e-14	4.2921e-14	0.609581	Up
ID_53463	ATP6V1E2	AP	1.25419e-14	4.63441e-14	0.379519	Up
ID_53462	ATP6V1E2	AP	1.25528e-14	4.63631e-14	-0.184443	Down
ID_84842	OXR1	AP	1.42615e-14	5.25284e-14	0.400672	Up
ID_53879	PCYOX1	AP	1.54301e-14	5.67806e-14	0.346271	Up
ID_74325	CYFIP2	AP	1.54918e-14	5.69552e-14	-0.28637	Down
ID_53877	PCYOX1	AP	1.6542e-14	6.06768e-14	-0.37021	Down
ID_78584	TMEM184A	AP	1.77344e-14	6.49611e-14	-1.5267	Down
ID_78583	TMEM184A	AP	1.77344e-14	6.49611e-14	0.182239	Up
ID_81964	TBXAS1	AP	1.83573e-14	6.71227e-14	-0.309537	Down
ID_81965	TBXAS1	AP	1.83581e-14	6.71227e-14	0.809612	Up
ID_80081	GTF2IRD1	AP	1.86216e-14	6.80264e-14	0.427812	Up
ID_80080	GTF2IRD1	AP	1.86222e-14	6.80264e-14	-0.471503	Down
ID_86004	CDKN2A	AP	2.11091e-14	7.66905e-14	0.449043	Up
ID_76416	RCAN2	AP	2.14187e-14	7.77447e-14	-0.810137	Down
ID_70265	TBCK	AP	2.36652e-14	8.54338e-14	-0.615269	Down
ID_70263	TBCK	AP	2.36839e-14	8.5463e-14	0.250346	Up
ID_20011	ENO2	AP	2.46554e-14	8.87418e-14	-0.383461	Down
ID_20012	ENO2	AP	2.46591e-14	8.87418e-14	0.30514	Up
ID_77527	EPB41L2	AP	2.92473e-14	1.0497e-13	-0.894792	Down
ID_13898	IGF2	AP	3.58504e-14	1.27866e-13	0.277855	Up
ID_41949	HEXIM2	AP	3.84278e-14	1.36466e-13	-0.34053	Down
ID_41950	HEXIM2	AP	3.8434e-14	1.36466e-13	0.347805	Up
ID_44737	LDLRAD4	AP	4.33351e-14	1.53128e-13	0.65698	Up
ID_9689	HHAT	AP	4.45196e-14	1.57244e-13	0.384073	Up
ID_4375	VTCN1	AP	4.85547e-14	1.71269e-13	-0.0638683	Down
ID_58111	MLPH	AP	5.01225e-14	1.76615e-13	0.58733	Up
ID_58112	MLPH	AP	5.01365e-14	1.76615e-13	-0.070924	Down
ID_19134	MCAM	AP	5.49621e-14	1.92765e-13	0.790109	Up
ID_19135	MCAM	AP	5.51028e-14	1.93174e-13	-0.0821557	Down
ID_44567	PTPRM	AP	5.56482e-14	1.95e-13	1.48275	Up
ID_22209	ITGA7	AP	5.59574e-14	1.9598e-13	-0.0952372	Down
ID_41831	UBTF	AP	6.12139e-14	2.13289e-13	0.420903	Up
ID_36427	FTO	AP	6.22059e-14	2.16462e-13	-0.0514333	Down
ID_34292	SYT17	AP	6.2667e-14	2.17972e-13	-0.454442	Down
ID_3656	DDAH1	AP	6.68604e-14	2.31251e-13	0.347619	Up
ID_30149	CAPN3	AP	7.09712e-14	2.44728e-13	0.285998	Up
ID_50380	CLPTM1	AP	8.76018e-14	3.00135e-13	0.224418	Up
ID_50379	CLPTM1	AP	8.76766e-14	3.00262e-13	-0.984011	Down
ID_15759	CELF1	AP	9.22951e-14	3.15135e-13	0.184494	Up
ID_14479	CYP2R1	AP	9.69888e-14	3.30879e-13	-0.562578	Down
ID_27182	FAM177A1	AP	1.07092e-13	3.64579e-13	-0.597384	Down
ID_27183	FAM177A1	AP	1.07095e-13	3.64579e-13	0.637121	Up
ID_143	MXRA8	AP	1.08148e-13	3.68007e-13	-0.0703642	Down
ID_142	MXRA8	AP	1.08202e-13	3.68035e-13	0.830064	Up
ID_38921	ACAP1	AP	1.37299e-13	4.63065e-13	0.526831	Up
ID_48535	HOMER3	AP	1.6586e-13	5.56578e-13	0.326965	Up
ID_24974	KNTC1	AP	1.76442e-13	5.90355e-13	-0.131739	Down
ID_49430	ZNF568	AP	1.81419e-13	6.067e-13	0.449048	Up
ID_49429	ZNF568	AP	1.81479e-13	6.067e-13	-0.115165	Down
ID_44459	ENOSF1	AP	1.82829e-13	6.10515e-13	-0.40793	Down
ID_44460	ENOSF1	AP	1.82837e-13	6.10515e-13	0.285701	Up
ID_15758	CELF1	AP	1.89386e-13	6.31549e-13	-0.970262	Down
ID_52350	ZNF587	AP	1.99349e-13	6.63203e-13	-0.575223	Down
ID_52349	ZNF587	AP	1.99375e-13	6.63203e-13	0.237081	Up
ID_75730	ZSCAN31	AP	2.28485e-13	7.5814e-13	0.808413	Up
ID_48533	HOMER3	AP	2.315e-13	7.67508e-13	-0.468539	Down
ID_68255	PIGX	AP	2.41137e-13	7.97985e-13	0.27559	Up
ID_68256	PIGX	AP	2.41191e-13	7.97985e-13	-0.27462	Down
ID_75728	ZSCAN31	AP	2.44679e-13	8.08521e-13	-0.345085	Down
ID_51621	ZNF28	AP	3.86498e-13	1.25385e-12	0.729923	Up
ID_52388	ZNF135	AP	3.95323e-13	1.28143e-12	-0.143949	Down
ID_52387	ZNF135	AP	3.95323e-13	1.28143e-12	0.608097	Up
ID_15695	NR1H3	AP	4.82261e-13	1.5513e-12	-0.524787	Down
ID_90030	STAG2	AP	4.88465e-13	1.56999e-12	-0.49779	Down
ID_31299	SMAD3	AP	4.96621e-13	1.59557e-12	0.777391	Up
ID_54659	TSGA10	AP	5.19975e-13	1.66725e-12	-0.509055	Down
ID_43459	LLGL2	AP	5.33039e-13	1.70773e-12	-0.195042	Down
ID_43458	LLGL2	AP	5.3304e-13	1.70773e-12	0.522234	Up
ID_21838	BIN2	AP	5.3795e-13	1.72114e-12	4.40474	Up
ID_21837	BIN2	AP	5.38073e-13	1.72114e-12	-0.0352147	Down
ID_84904	SYBU	AP	5.4728e-13	1.74989e-12	1.29567	Up
ID_86873	CENPP	AP	5.52639e-13	1.76633e-12	-0.780436	Down
ID_13333	TACC2	AP	8.95738e-13	2.82122e-12	-0.0557865	Down
ID_78162	ESR1	AP	8.97164e-13	2.8246e-12	-1.79907	Down
ID_26710	SLC7A8	AP	9.02326e-13	2.83862e-12	0.311552	Up
ID_70529	SPRY1	AP	9.85308e-13	3.09148e-12	-0.0840329	Down
ID_70528	SPRY1	AP	9.8541e-13	3.09148e-12	0.316052	Up
ID_13337	TACC2	AP	1.03679e-12	3.24632e-12	1.59846	Up
ID_18041	RAB30	AP	1.08727e-12	3.39904e-12	0.923948	Up
ID_465	PLEKHG5	AP	1.1246e-12	3.5089e-12	0.680697	Up
ID_56096	KIAA1715	AP	1.34482e-12	4.17034e-12	-0.887163	Down
ID_56097	KIAA1715	AP	1.34494e-12	4.17034e-12	0.219584	Up
ID_26712	SLC7A8	AP	1.35832e-12	4.2102e-12	-0.86275	Down
ID_12494	PANK1	AP	1.49712e-12	4.62609e-12	-0.808871	Down
ID_12493	PANK1	AP	1.49712e-12	4.62609e-12	0.441876	Up
ID_51477	ZNF83	AP	1.54795e-12	4.77394e-12	0.37856	Up
ID_85054	ATAD2	AP	1.58797e-12	4.89172e-12	0.220784	Up
ID_85053	ATAD2	AP	1.58883e-12	4.89248e-12	-0.93954	Down
ID_34290	SYT17	AP	1.67923e-12	5.16288e-12	0.413643	Up
ID_86871	CENPP	AP	1.79784e-12	5.51698e-12	0.594783	Up
ID_34282	COQ7	AP	1.99842e-12	6.10255e-12	-0.479705	Down
ID_34281	COQ7	AP	1.99859e-12	6.10255e-12	0.266612	Up
ID_65630	PDZRN3	AP	2.1065e-12	6.42471e-12	0.298106	Up
ID_80168	ZP3	AP	2.15722e-12	6.56687e-12	-0.680832	Down
ID_11481	ARHGAP22	AP	2.2075e-12	6.70719e-12	-0.747825	Down
ID_90298	CXorf40A	AP	2.42101e-12	7.33362e-12	-0.224998	Down
ID_90295	CXorf40A	AP	2.42224e-12	7.33456e-12	0.408435	Up
ID_22296	DGKA	AP	2.57509e-12	7.78266e-12	-0.567397	Down
ID_44739	LDLRAD4	AP	2.68227e-12	8.09436e-12	0.643315	Up
ID_76409	CLIC5	AP	3.18841e-12	9.56405e-12	0.79652	Up
ID_76408	CLIC5	AP	3.18841e-12	9.56405e-12	-0.0511374	Down
ID_61975	MB	AP	3.31301e-12	9.92291e-12	0.3146	Up
ID_77376	PKIB	AP	3.33898e-12	9.99696e-12	-0.700458	Down
ID_51650	ZNF160	AP	3.52217e-12	1.05183e-11	-0.0903639	Down
ID_51649	ZNF160	AP	3.5223e-12	1.05183e-11	0.472357	Up
ID_4373	VTCN1	AP	3.78043e-12	1.1268e-11	2.11818	Up
ID_52695	GREB1	AP	4.11338e-12	1.22285e-11	-0.289961	Down
ID_44852	TTC39C	AP	4.15524e-12	1.23484e-11	0.803118	Up
ID_468	PLEKHG5	AP	4.1925e-12	1.24545e-11	1.27004	Up
ID_22333	SUOX	AP	4.53706e-12	1.34481e-11	0.45599	Up
ID_22334	SUOX	AP	4.54036e-12	1.34529e-11	-0.119052	Down
ID_35937	MAZ	AP	4.5773e-12	1.35574e-11	-0.259984	Down
ID_54885	LIMS1	AP	4.80763e-12	1.42238e-11	0.409583	Up
ID_19633	RAD52	AP	5.61057e-12	1.64843e-11	0.458869	Up
ID_19635	RAD52	AP	5.61083e-12	1.64843e-11	-0.197188	Down
ID_65598	FOXP1	AP	6.13491e-12	1.79698e-11	-0.329476	Down
ID_22116	HOXC6	AP	7.16304e-12	2.08722e-11	0.381544	Up
ID_22115	HOXC6	AP	7.16439e-12	2.08722e-11	-0.172755	Down
ID_66876	CEP63	AP	8.49147e-12	2.45773e-11	-0.194969	Down
ID_23719	PLXNC1	AP	8.80395e-12	2.54541e-11	0.287754	Up
ID_72747	MEF2C	AP	9.05484e-12	2.61528e-11	0.715297	Up
ID_72749	MEF2C	AP	9.05539e-12	2.61528e-11	-0.212087	Down
ID_13328	NSMCE4A	AP	9.12875e-12	2.63551e-11	-0.106907	Down
ID_13329	NSMCE4A	AP	9.13861e-12	2.63741e-11	0.306042	Up
ID_79895	RABGEF1	AP	1.01568e-11	2.91906e-11	-0.843619	Down
ID_79894	RABGEF1	AP	1.01583e-11	2.91906e-11	0.287041	Up
ID_4144	CHI3L2	AP	1.07434e-11	3.07725e-11	0.860927	Up
ID_10373	EDARADD	AP	1.20162e-11	3.43247e-11	-0.296901	Down
ID_10372	EDARADD	AP	1.20179e-11	3.43247e-11	0.285402	Up
ID_18682	ALG9	AP	1.21247e-11	3.45943e-11	0.258457	Up
ID_18683	ALG9	AP	1.21253e-11	3.45943e-11	-0.21344	Down
ID_24958	ZCCHC8	AP	1.56368e-11	4.43126e-11	0.274807	Up
ID_25551	PAN3	AP	1.59175e-11	4.50762e-11	0.286139	Up
ID_25550	PAN3	AP	1.59233e-11	4.50766e-11	-0.32347	Down
ID_42192	HOXB3	AP	1.62718e-11	4.59979e-11	-0.631924	Down
ID_29608	BRF1	AP	1.897e-11	5.33241e-11	0.218946	Up
ID_56812	CASP8	AP	1.9326e-11	5.43057e-11	0.460711	Up
ID_7877	ZBTB7B	AP	1.93967e-11	5.44659e-11	0.343307	Up
ID_72277	MAST4	AP	1.98465e-11	5.56315e-11	-0.494732	Down
ID_71598	FAM134B	AP	2.00071e-11	5.60226e-11	0.341023	Up
ID_71599	FAM134B	AP	2.00071e-11	5.60226e-11	-0.69329	Down
ID_8241	TSACC	AP	2.06326e-11	5.76933e-11	-0.339672	Down
ID_56813	CASP8	AP	2.25477e-11	6.29825e-11	-0.451259	Down
ID_88575	CTPS2	AP	2.34801e-11	6.55183e-11	-0.348731	Down
ID_41830	UBTF	AP	2.7659e-11	7.66974e-11	0.570988	Up
ID_56028	WIPF1	AP	2.77449e-11	7.6909e-11	0.480564	Up
ID_228	NADK	AP	2.77549e-11	7.69101e-11	0.477887	Up
ID_12485	LIPA	AP	3.11875e-11	8.61888e-11	-0.12227	Down
ID_12486	LIPA	AP	3.11896e-11	8.61888e-11	0.572955	Up
ID_52118	ZNF581	AP	3.93766e-11	1.07992e-10	-0.610058	Down
ID_21985	MFSD5	AP	4.02082e-11	1.10143e-10	0.211839	Up
ID_21984	MFSD5	AP	4.02101e-11	1.10143e-10	-0.49803	Down
ID_88576	CTPS2	AP	4.02161e-11	1.10143e-10	0.246577	Up
ID_26396	GAS6	AP	4.58799e-11	1.25056e-10	0.928456	Up
ID_52119	ZNF581	AP	4.60119e-11	1.25373e-10	0.220885	Up
ID_8172	LMNA	AP	5.46591e-11	1.48027e-10	0.686307	Up
ID_17772	KCNE3	AP	5.9598e-11	1.6092e-10	-0.500173	Down
ID_17773	KCNE3	AP	5.96009e-11	1.6092e-10	0.276341	Up
ID_43127	AMZ2	AP	6.78886e-11	1.82346e-10	-0.257697	Down
ID_43128	AMZ2	AP	6.79012e-11	1.82346e-10	0.411824	Up
ID_174	ATAD3A	AP	7.01892e-11	1.88124e-10	-0.0902888	Down
ID_175	ATAD3A	AP	7.01938e-11	1.88124e-10	0.717529	Up
ID_40846	RAPGEFL1	AP	7.05455e-11	1.88952e-10	0.335717	Up
ID_40847	RAPGEFL1	AP	7.05499e-11	1.88952e-10	-0.775903	Down
ID_45426	KATNAL2	AP	7.11586e-11	1.90455e-10	-0.215827	Down
ID_45428	KATNAL2	AP	7.11586e-11	1.90455e-10	1.05626	Up
ID_86000	CDKN2A	AP	7.20431e-11	1.92757e-10	-0.42796	Down
ID_79831	ZNF107	AP	8.24501e-11	2.19501e-10	-0.0887613	Down
ID_9454	ZC3H11A	AP	8.40397e-11	2.23622e-10	-0.218951	Down
ID_53012	KRTCAP3	AP	8.40819e-11	2.23622e-10	0.138372	Up
ID_53011	KRTCAP3	AP	8.41285e-11	2.23672e-10	-0.509211	Down
ID_61977	MB	AP	9.01306e-11	2.38836e-10	-0.347969	Down
ID_11140	ZEB1	AP	9.1598e-11	2.42644e-10	-0.0778438	Down
ID_11141	ZEB1	AP	9.1631e-11	2.42651e-10	0.596297	Up
ID_16990	KLC2	AP	9.20942e-11	2.43797e-10	-0.489359	Down
ID_38919	ACAP1	AP	9.39186e-11	2.48298e-10	-0.428088	Down
ID_7603	RFX5	AP	9.41041e-11	2.48706e-10	-0.201655	Down
ID_70169	SLC9B2	AP	9.85301e-11	2.60145e-10	0.447554	Up
ID_9387	NAV1	AP	9.93648e-11	2.62263e-10	-0.40853	Down
ID_76037	SAYSD1	AP	1.01065e-10	2.66451e-10	-0.254347	Down
ID_76036	SAYSD1	AP	1.01085e-10	2.66451e-10	0.230356	Up
ID_87176	AKAP2	AP	1.03395e-10	2.72189e-10	-0.99145	Down
ID_67667	TBL1XR1	AP	1.0527e-10	2.76662e-10	-0.473991	Down
ID_67668	TBL1XR1	AP	1.05317e-10	2.76695e-10	0.16172	Up
ID_14691	NAV2	AP	1.09471e-10	2.87044e-10	0.630521	Up
ID_75296	GCNT2	AP	1.10285e-10	2.89082e-10	-0.820996	Down
ID_80169	ZP3	AP	1.14502e-10	2.99352e-10	0.306082	Up
ID_29907	MEIS2	AP	1.19467e-10	3.11619e-10	-0.595019	Down
ID_37470	PHLPP2	AP	1.1997e-10	3.12828e-10	0.349069	Up
ID_58149	RAMP1	AP	1.25747e-10	3.27573e-10	-0.0991657	Down
ID_81858	CALD1	AP	1.28301e-10	3.34008e-10	-0.586893	Down
ID_88669	RPS6KA3	AP	1.29335e-10	3.36591e-10	-0.693314	Down
ID_52423	ZNF544	AP	1.32408e-10	3.44153e-10	0.441484	Up
ID_52420	ZNF544	AP	1.32413e-10	3.44153e-10	-0.253133	Down
ID_65645	ROBO1	AP	1.34459e-10	3.4913e-10	-0.0379378	Down
ID_65644	ROBO1	AP	1.34459e-10	3.4913e-10	7.51812	Up
ID_11485	ARHGAP22	AP	1.43608e-10	3.72041e-10	0.445106	Up
ID_56026	WIPF1	AP	1.46827e-10	3.8001e-10	-0.150736	Down
ID_16886	SIPA1	AP	1.47215e-10	3.80894e-10	0.527947	Up
ID_13491	LRRC27	AP	1.77919e-10	4.57375e-10	-0.221212	Down
ID_29249	SLC25A29	AP	1.7808e-10	4.57518e-10	-0.168275	Down
ID_29250	SLC25A29	AP	1.78089e-10	4.57518e-10	0.576516	Up
ID_84388	OSGIN2	AP	1.89745e-10	4.85748e-10	-0.463855	Down
ID_84387	OSGIN2	AP	1.89745e-10	4.85748e-10	0.330881	Up
ID_79830	ZNF107	AP	1.97546e-10	5.04588e-10	0.455397	Up
ID_9455	ZC3H11A	AP	1.97743e-10	5.0493e-10	0.205682	Up
ID_16889	SIPA1	AP	2.01671e-10	5.14794e-10	-0.424032	Down
ID_39649	TVP23B	AP	2.10982e-10	5.37705e-10	-0.0713705	Down
ID_55724	RBMS1	AP	2.33916e-10	5.93695e-10	-0.114032	Down
ID_81856	CALD1	AP	2.53486e-10	6.41534e-10	0.138892	Up
ID_77241	CDK19	AP	2.55351e-10	6.45846e-10	1.72731	Up
ID_56964	CARF	AP	2.60269e-10	6.57781e-10	-0.134221	Down
ID_56963	CARF	AP	2.60317e-10	6.57781e-10	0.397307	Up
ID_69096	APBB2	AP	2.66804e-10	6.7311e-10	1.71964	Up
ID_69095	APBB2	AP	2.66804e-10	6.7311e-10	-0.0484454	Down
ID_33617	TRAP1	AP	2.82805e-10	7.11702e-10	-0.398986	Down
ID_33618	TRAP1	AP	2.82902e-10	7.11702e-10	0.301983	Up
ID_43985	C1QTNF1	AP	2.96336e-10	7.43861e-10	-0.297154	Down
ID_21469	CACNB3	AP	3.39697e-10	8.46069e-10	0.285284	Up
ID_11067	ACBD5	AP	3.58566e-10	8.91719e-10	0.204341	Up
ID_11066	ACBD5	AP	3.58654e-10	8.91719e-10	-0.375966	Down
ID_3304	PDE4B	AP	3.89524e-10	9.65661e-10	-0.679883	Down
ID_18515	CASP1	AP	4.10781e-10	1.01593e-09	-0.212722	Down
ID_18514	CASP1	AP	4.10816e-10	1.01593e-09	0.109953	Up
ID_52491	SH3YL1	AP	4.15178e-10	1.02608e-09	-2.12136	Down
ID_21943	CSAD	AP	4.42699e-10	1.09106e-09	-0.379021	Down
ID_38605	RNF167	AP	4.59873e-10	1.12962e-09	-0.348865	Down
ID_38606	RNF167	AP	4.59897e-10	1.12962e-09	0.166311	Up
ID_44335	C17orf62	AP	4.74885e-10	1.165e-09	-0.166076	Down
ID_84902	SYBU	AP	4.77107e-10	1.1701e-09	-0.281885	Down
ID_8245	TSACC	AP	4.94396e-10	1.2099e-09	0.37006	Up
ID_58148	RAMP1	AP	5.8495e-10	1.42367e-09	1.0937	Up
ID_81744	AHCYL2	AP	5.99967e-10	1.45844e-09	0.514868	Up
ID_88670	RPS6KA3	AP	6.12758e-10	1.48728e-09	0.572761	Up
ID_39651	TVP23B	AP	7.89947e-10	1.90463e-09	0.376853	Up
ID_43589	CYGB	AP	8.05071e-10	1.93935e-09	-0.697159	Down
ID_43591	CYGB	AP	9.08777e-10	2.17932e-09	0.20894	Up
ID_42921	CYB561	AP	9.10903e-10	2.18377e-09	0.332261	Up
ID_43705	SEC14L1	AP	9.63558e-10	2.30516e-09	0.256	Up
ID_69629	CCNG2	AP	9.99559e-10	2.38558e-09	0.869157	Up
ID_69630	CCNG2	AP	9.99559e-10	2.38558e-09	-0.112062	Down
ID_38260	GEMIN4	AP	1.0643e-09	2.53497e-09	0.275515	Up
ID_38259	GEMIN4	AP	1.06437e-09	2.53497e-09	-0.395578	Down
ID_9776	ANGEL2	AP	1.14529e-09	2.72526e-09	-0.188717	Down
ID_9775	ANGEL2	AP	1.14604e-09	2.72624e-09	0.210555	Up
ID_86206	IL11RA	AP	1.21498e-09	2.8868e-09	-0.780527	Down
ID_89247	MAGED2	AP	1.229e-09	2.91923e-09	-0.173223	Down
ID_81742	AHCYL2	AP	1.28236e-09	3.03876e-09	-0.386316	Down
ID_12947	NFKB2	AP	1.30548e-09	3.09171e-09	0.454956	Up
ID_12946	NFKB2	AP	1.30661e-09	3.09348e-09	-0.0985582	Down
ID_44784	RBBP8	AP	1.32758e-09	3.1422e-09	-0.126798	Down
ID_65289	SFMBT1	AP	1.36047e-09	3.21542e-09	-0.740869	Down
ID_65290	SFMBT1	AP	1.36052e-09	3.21542e-09	0.178679	Up
ID_1898	HEYL	AP	1.36493e-09	3.22418e-09	-0.17258	Down
ID_1899	HEYL	AP	1.36504e-09	3.22418e-09	0.756202	Up
ID_20502	MANSC1	AP	1.43249e-09	3.37419e-09	-0.757245	Down
ID_20503	MANSC1	AP	1.43277e-09	3.37419e-09	0.126141	Up
ID_51474	ZNF83	AP	1.43513e-09	3.37876e-09	-0.200076	Down
ID_23721	PLXNC1	AP	1.54735e-09	3.63656e-09	-0.762366	Down
ID_68590	SH3BP2	AP	1.55377e-09	3.64843e-09	-0.482928	Down
ID_55726	RBMS1	AP	1.62281e-09	3.80382e-09	0.245891	Up
ID_70573	PGRMC2	AP	2.19558e-09	5.10601e-09	0.314541	Up
ID_11230	CREM	AP	2.25831e-09	5.24577e-09	0.587017	Up
ID_48700	ZNF682	AP	2.3656e-09	5.49342e-09	-0.805334	Down
ID_61042	SLC25A1	AP	2.57116e-09	5.94223e-09	0.427313	Up
ID_61041	SLC25A1	AP	2.5715e-09	5.94223e-09	-0.099126	Down
ID_44336	C17orf62	AP	2.66616e-09	6.15387e-09	0.382759	Up
ID_62399	XPNPEP3	AP	2.75073e-09	6.34357e-09	-0.299325	Down
ID_62400	XPNPEP3	AP	2.75189e-09	6.34441e-09	0.23698	Up
ID_14477	CYP2R1	AP	3.32553e-09	7.62737e-09	0.181347	Up
ID_52699	GREB1	AP	3.68734e-09	8.41378e-09	1.43623	Up
ID_39067	CHD3	AP	3.80828e-09	8.67984e-09	0.672092	Up
ID_39068	CHD3	AP	3.81073e-09	8.68294e-09	-0.122955	Down
ID_13934	SLC22A18	AP	3.84131e-09	8.75014e-09	0.495878	Up
ID_45651	NEDD4L	AP	4.0187e-09	9.1412e-09	0.592293	Up
ID_24650	TBX5	AP	4.52635e-09	1.02473e-08	0.212817	Up
ID_24649	TBX5	AP	4.52675e-09	1.02473e-08	-0.553719	Down
ID_38382	SMG6	AP	4.59408e-09	1.03939e-08	0.25369	Up
ID_13792	TSPAN4	AP	5.00779e-09	1.12979e-08	0.234959	Up
ID_65588	MITF	AP	5.48876e-09	1.23482e-08	-0.0577348	Down
ID_78028	SHPRH	AP	5.64058e-09	1.26675e-08	0.133063	Up
ID_78029	SHPRH	AP	5.6418e-09	1.26675e-08	-0.654998	Down
ID_12514	HECTD2	AP	6.05213e-09	1.3547e-08	-0.402009	Down
ID_12513	HECTD2	AP	6.05473e-09	1.3549e-08	0.328013	Up
ID_55769	GCA	AP	6.15365e-09	1.37589e-08	-0.049571	Down
ID_48791	ZNF43	AP	6.31117e-09	1.40992e-08	0.245455	Up
ID_56783	CFLAR	AP	6.61551e-09	1.47626e-08	-0.157463	Down
ID_7876	ZBTB7B	AP	8.02286e-09	1.77989e-08	-0.373547	Down
ID_29687	NIPA1	AP	8.16583e-09	1.8086e-08	0.381836	Up
ID_77240	CDK19	AP	8.59419e-09	1.89822e-08	-0.049684	Down
ID_56787	CFLAR	AP	8.83877e-09	1.94955e-08	0.219457	Up
ID_33028	LMF1	AP	9.08283e-09	1.99952e-08	0.106316	Up
ID_33029	LMF1	AP	9.08595e-09	1.99966e-08	-0.908032	Down
ID_10007	H3F3A	AP	9.26761e-09	2.03852e-08	-0.837458	Down
ID_72353	RAD17	AP	9.28572e-09	2.04194e-08	-0.135831	Down
ID_75389	SIRT5	AP	9.91166e-09	2.17318e-08	-0.0963239	Down
ID_75390	SIRT5	AP	9.91239e-09	2.17318e-08	0.414887	Up
ID_913	TMCO4	AP	1.01831e-08	2.22949e-08	-0.18544	Down
ID_914	TMCO4	AP	1.01832e-08	2.22949e-08	0.133477	Up
ID_48790	ZNF43	AP	1.01874e-08	2.22979e-08	-0.220073	Down
ID_26528	ZNF219	AP	1.06001e-08	2.31759e-08	-0.358269	Down
ID_73878	NR3C1	AP	1.29931e-08	2.82381e-08	0.829473	Up
ID_73624	CXXC5	AP	1.3246e-08	2.87333e-08	-0.198161	Down
ID_73623	CXXC5	AP	1.32461e-08	2.87333e-08	0.311687	Up
ID_28503	JDP2	AP	1.32863e-08	2.88128e-08	-0.227578	Down
ID_36223	ZNF646	AP	1.35005e-08	2.92533e-08	0.313129	Up
ID_36224	ZNF646	AP	1.35041e-08	2.92533e-08	-0.133905	Down
ID_48699	ZNF682	AP	1.40348e-08	3.0362e-08	0.187681	Up
ID_10005	H3F3A	AP	1.4656e-08	3.16801e-08	0.42287	Up
ID_543	RERE	AP	1.74226e-08	3.74076e-08	-0.352441	Down
ID_4145	CHI3L2	AP	2.13438e-08	4.54486e-08	-0.612659	Down
ID_18359	PIWIL4	AP	2.28482e-08	4.84586e-08	0.0927315	Up
ID_27739	L3HYPDH	AP	2.29919e-08	4.87118e-08	-0.138029	Down
ID_27738	L3HYPDH	AP	2.2992e-08	4.87118e-08	0.430841	Up
ID_26398	GAS6	AP	2.34649e-08	4.9635e-08	-0.266131	Down
ID_70575	PGRMC2	AP	2.6074e-08	5.5023e-08	-0.636784	Down
ID_51264	KLK10	AP	2.72654e-08	5.74008e-08	0.166928	Up
ID_17513	NUMA1	AP	2.81087e-08	5.90962e-08	-0.137112	Down
ID_17514	NUMA1	AP	2.8115e-08	5.90962e-08	0.386641	Up
ID_32066	DNAJA4	AP	2.82099e-08	5.92644e-08	-0.50626	Down
ID_73415	SAR1B	AP	3.01207e-08	6.31958e-08	0.222609	Up
ID_49133	DMKN	AP	3.02943e-08	6.35434e-08	1.78938	Up
ID_85000	ENPP2	AP	3.37198e-08	7.03046e-08	-0.53691	Down
ID_42606	AKAP1	AP	3.43229e-08	7.15247e-08	-0.696377	Down
ID_49029	FXYD3	AP	3.57493e-08	7.42866e-08	0.313942	Up
ID_3306	PDE4B	AP	4.31918e-08	8.89636e-08	0.187239	Up
ID_36340	SIAH1	AP	4.32769e-08	8.9116e-08	0.262103	Up
ID_85002	ENPP2	AP	5.07628e-08	1.03862e-07	0.101962	Up
ID_38558	ARRB2	AP	5.22902e-08	1.06906e-07	-0.413674	Down
ID_38557	ARRB2	AP	5.23042e-08	1.06907e-07	0.185479	Up
ID_85287	PTK2	AP	5.52772e-08	1.12724e-07	0.228059	Up
ID_89209	IQSEC2	AP	5.79031e-08	1.1788e-07	0.444929	Up
ID_89210	IQSEC2	AP	5.79083e-08	1.1788e-07	-0.0674062	Down
ID_49901	SERTAD3	AP	6.58257e-08	1.33511e-07	-0.431374	Down
ID_49902	SERTAD3	AP	6.58375e-08	1.33511e-07	0.187397	Up
ID_972	ALPL	AP	6.64272e-08	1.34672e-07	0.643504	Up
ID_16361	EML3	AP	6.65817e-08	1.34883e-07	-1.12795	Down
ID_43443	KIAA0195	AP	6.68382e-08	1.35356e-07	-1.13478	Down
ID_43444	KIAA0195	AP	6.68489e-08	1.35356e-07	0.211684	Up
ID_7768	CREB3L4	AP	7.71635e-08	1.55192e-07	-0.613155	Down
ID_7769	CREB3L4	AP	7.71694e-08	1.55192e-07	0.296356	Up
ID_10547	ZNF692	AP	7.96478e-08	1.60022e-07	0.330224	Up
ID_10549	ZNF692	AP	7.96508e-08	1.60022e-07	-0.25562	Down
ID_467	PLEKHG5	AP	7.99201e-08	1.60523e-07	0.919488	Up
ID_65629	PDZRN3	AP	8.01215e-08	1.60887e-07	-1.6235	Down
ID_83362	RAB11FIP1	AP	8.04511e-08	1.61508e-07	-0.294298	Down
ID_83363	RAB11FIP1	AP	8.0472e-08	1.61509e-07	0.419798	Up
ID_1198	MTFR1L	AP	8.0664e-08	1.61854e-07	-0.15921	Down
ID_42195	HOXB3	AP	8.64125e-08	1.72955e-07	1.44776	Up
ID_25237	EP400NL	AP	9.33684e-08	1.86271e-07	-0.520948	Down
ID_73005	MCC	AP	1.12343e-07	2.22241e-07	-0.216909	Down
ID_74126	TNIP1	AP	1.35383e-07	2.66501e-07	0.675845	Up
ID_28505	FLVCR2	AP	1.47211e-07	2.88932e-07	-0.0780114	Down
ID_46390	SBNO2	AP	1.51447e-07	2.96822e-07	0.807397	Up
ID_46391	SBNO2	AP	1.51453e-07	2.96822e-07	-0.11336	Down
ID_62571	TSPO	AP	1.64806e-07	3.218e-07	-0.0439934	Down
ID_62570	TSPO	AP	1.64842e-07	3.218e-07	0.52467	Up
ID_77994	PLAGL1	AP	1.84287e-07	3.57753e-07	-0.210557	Down
ID_74031	PCYOX1L	AP	1.90097e-07	3.68442e-07	0.312032	Up
ID_74032	PCYOX1L	AP	1.90116e-07	3.68442e-07	-0.294442	Down
ID_40691	GRB7	AP	1.94291e-07	3.76259e-07	-0.125109	Down
ID_74127	TNIP1	AP	1.97122e-07	3.8165e-07	-0.132293	Down
ID_78242	SYNJ2	AP	2.13911e-07	4.12955e-07	-0.138447	Down
ID_9672	LAMB3	AP	2.37741e-07	4.56535e-07	-0.293517	Down
ID_73966	SCGB3A2	AP	2.41587e-07	4.63609e-07	-0.126272	Down
ID_73965	SCGB3A2	AP	2.41598e-07	4.63609e-07	0.998116	Up
ID_36979	LRRC29	AP	2.48894e-07	4.76694e-07	-0.310007	Down
ID_9671	LAMB3	AP	2.6234e-07	5.01247e-07	0.707481	Up
ID_73004	MCC	AP	2.90366e-07	5.53474e-07	0.585357	Up
ID_11121	MAP3K8	AP	2.97423e-07	5.6625e-07	-0.288513	Down
ID_11120	MAP3K8	AP	2.97423e-07	5.6625e-07	0.306115	Up
ID_79267	ELMO1	AP	3.16871e-07	6.01701e-07	0.148284	Up
ID_79266	ELMO1	AP	3.34863e-07	6.34661e-07	-0.669821	Down
ID_69088	RBM47	AP	3.44407e-07	6.51823e-07	0.188906	Up
ID_86570	TMEM2	AP	3.48148e-07	6.58621e-07	-0.970224	Down
ID_86569	TMEM2	AP	3.48163e-07	6.58621e-07	0.105755	Up
ID_13729	EPS8L2	AP	3.56694e-07	6.7428e-07	0.203893	Up
ID_13727	EPS8L2	AP	3.56694e-07	6.7428e-07	-0.425543	Down
ID_72944	SLC25A46	AP	3.65412e-07	6.90271e-07	0.122205	Up
ID_89138	SHROOM4	AP	3.67825e-07	6.94665e-07	0.604978	Up
ID_89139	SHROOM4	AP	3.6809e-07	6.94837e-07	-0.108068	Down
ID_22720	AGAP2	AP	4.43269e-07	8.32673e-07	-0.635121	Down
ID_22721	AGAP2	AP	4.43294e-07	8.32673e-07	0.200162	Up
ID_83368	ASH2L	AP	5.12675e-07	9.56261e-07	-0.698438	Down
ID_83369	ASH2L	AP	5.12675e-07	9.56261e-07	0.190438	Up
ID_36981	LRRC29	AP	5.65781e-07	1.05164e-06	0.305527	Up
ID_40830	MED24	AP	6.15414e-07	1.14089e-06	-0.065478	Down
ID_40828	MED24	AP	6.15508e-07	1.14089e-06	0.304439	Up
ID_79045	SNX10	AP	6.47195e-07	1.19685e-06	0.132158	Up
ID_88047	ADAMTS13	AP	6.5471e-07	1.21e-06	0.32495	Up
ID_88045	ADAMTS13	AP	6.54759e-07	1.21e-06	-0.195555	Down
ID_975	ALPL	AP	7.20428e-07	1.3292e-06	-0.20472	Down
ID_73958	DPYSL3	AP	7.3237e-07	1.34999e-06	0.120995	Up
ID_73957	DPYSL3	AP	7.32797e-07	1.35047e-06	-0.266093	Down
ID_12468	STAMBPL1	AP	7.50352e-07	1.38123e-06	0.258549	Up
ID_10927	VIM	AP	7.57865e-07	1.39423e-06	-0.467617	Down
ID_10928	VIM	AP	7.58221e-07	1.39443e-06	0.144173	Up
ID_47762	ZNF763	AP	7.66806e-07	1.40966e-06	-0.0859964	Down
ID_47763	ZNF763	AP	7.66855e-07	1.40966e-06	0.296114	Up
ID_63710	UBE2E2	AP	8.69107e-07	1.58995e-06	0.206538	Up
ID_63709	UBE2E2	AP	8.69447e-07	1.59021e-06	-0.279672	Down
ID_37492	ZNF821	AP	9.19862e-07	1.68011e-06	-0.691432	Down
ID_71560	2021-03-06	AP	9.73353e-07	1.77538e-06	0.301275	Up
ID_71561	2021-03-06	AP	9.73683e-07	1.77558e-06	-0.134888	Down
ID_49132	DMKN	AP	9.8524e-07	1.79543e-06	-0.103881	Down
ID_84590	NDUFAF6	AP	1.10746e-06	2.00864e-06	0.163652	Up
ID_84587	NDUFAF6	AP	1.10752e-06	2.00864e-06	-0.690134	Down
ID_38135	ZNF276	AP	1.11545e-06	2.02211e-06	-0.282116	Down
ID_45313	PIK3C3	AP	1.28291e-06	2.3152e-06	-0.0469138	Down
ID_19837	SCNN1A	AP	1.30791e-06	2.35873e-06	0.178616	Up
ID_38137	ZNF276	AP	1.34824e-06	2.42955e-06	0.357023	Up
ID_24959	ZCCHC8	AP	1.59197e-06	2.85298e-06	-0.116208	Down
ID_9887	MIA3	AP	1.60817e-06	2.88011e-06	-0.236571	Down
ID_9888	MIA3	AP	1.60818e-06	2.88011e-06	0.116404	Up
ID_51620	ZNF28	AP	1.62573e-06	2.90894e-06	-0.210255	Down
ID_51263	KLK10	AP	1.66205e-06	2.96662e-06	-0.516313	Down
ID_37496	ZNF821	AP	1.67242e-06	2.98313e-06	0.22605	Up
ID_61187	PI4KA	AP	1.68298e-06	3.0013e-06	0.144479	Up
ID_61188	PI4KA	AP	1.68363e-06	3.0018e-06	-0.333471	Down
ID_56564	MFSD6	AP	1.83208e-06	3.25558e-06	0.149927	Up
ID_50207	PINLYP	AP	1.97752e-06	3.5065e-06	-0.583381	Down
ID_14695	NAV2	AP	1.98225e-06	3.51308e-06	-1.58025	Down
ID_17684	P2RY6	AP	2.01981e-06	3.57725e-06	-0.75472	Down
ID_43583	SPHK1	AP	2.08328e-06	3.68477e-06	0.354687	Up
ID_29688	NIPA1	AP	2.15048e-06	3.80027e-06	-0.0902911	Down
ID_53483	TTC7A	AP	2.32834e-06	4.09426e-06	-0.20527	Down
ID_53482	TTC7A	AP	2.32861e-06	4.09426e-06	0.292969	Up
ID_65627	PDZRN3	AP	2.44906e-06	4.29378e-06	-1.21134	Down
ID_38954	FGF11	AP	2.45149e-06	4.29709e-06	-0.360648	Down
ID_37585	ZFP1	AP	2.53817e-06	4.44406e-06	-0.199521	Down
ID_37584	ZFP1	AP	2.53867e-06	4.44406e-06	0.234101	Up
ID_32873	NME4	AP	2.55909e-06	4.47882e-06	-0.394178	Down
ID_44448	CLUL1	AP	2.59952e-06	4.54859e-06	-0.124685	Down
ID_20023	PTPN6	AP	2.6834e-06	4.68828e-06	-0.355253	Down
ID_20022	PTPN6	AP	2.68345e-06	4.68828e-06	0.315617	Up
ID_23706	SOCS2	AP	2.79075e-06	4.86723e-06	-0.268938	Down
ID_35902	NFATC2IP	AP	2.80466e-06	4.8883e-06	-0.278548	Down
ID_29905	MEIS2	AP	2.88398e-06	5.02108e-06	0.272814	Up
ID_60323	BACH1	AP	3.79642e-06	6.54353e-06	-0.0798588	Down
ID_60322	BACH1	AP	3.79689e-06	6.54353e-06	0.268039	Up
ID_26986	NFATC4	AP	3.83772e-06	6.60821e-06	-0.371547	Down
ID_55988	RAPGEF4	AP	3.88325e-06	6.68085e-06	0.579968	Up
ID_32167	ZFAND6	AP	4.07198e-06	6.99202e-06	0.119614	Up
ID_35900	NFATC2IP	AP	4.16503e-06	7.1472e-06	0.257842	Up
ID_60637	SH3BGR	AP	4.19908e-06	7.20123e-06	0.521548	Up
ID_60639	SH3BGR	AP	4.19922e-06	7.20123e-06	-0.125473	Down
ID_90423	TREX2	AP	4.2671e-06	7.31437e-06	-0.10144	Down
ID_90425	TREX2	AP	4.26793e-06	7.31437e-06	0.583534	Up
ID_29906	MEIS2	AP	4.3213e-06	7.40266e-06	0.139915	Up
ID_74300	SGCD	AP	4.98649e-06	8.50242e-06	-1.39435	Down
ID_74301	SGCD	AP	4.98667e-06	8.50242e-06	0.140592	Up
ID_23364	CNOT2	AP	5.06127e-06	8.62268e-06	0.194078	Up
ID_23363	CNOT2	AP	5.06151e-06	8.62268e-06	-0.401991	Down
ID_90068	AIFM1	AP	5.34536e-06	9.08567e-06	-0.317208	Down
ID_90067	AIFM1	AP	5.34578e-06	9.08567e-06	0.122399	Up
ID_77377	PKIB	AP	5.42516e-06	9.21276e-06	0.328351	Up
ID_33986	EMP2	AP	5.61296e-06	9.5256e-06	0.0819875	Up
ID_33987	EMP2	AP	5.61644e-06	9.52948e-06	-0.398512	Down
ID_38918	ACAP1	AP	5.68499e-06	9.63557e-06	-0.397222	Down
ID_29605	BRF1	AP	5.95566e-06	1.00794e-05	-0.355999	Down
ID_12537	HHEX	AP	6.69532e-06	1.12716e-05	0.120984	Up
ID_12536	HHEX	AP	6.69719e-06	1.12724e-05	-0.395141	Down
ID_1757	MAP7D1	AP	6.70018e-06	1.12728e-05	0.111893	Up
ID_1756	MAP7D1	AP	6.70029e-06	1.12728e-05	-0.509811	Down
ID_13459	PTPRE	AP	6.88556e-06	1.15683e-05	0.547734	Up
ID_49425	ZNF345	AP	7.87076e-06	1.31811e-05	0.151259	Up
ID_87524	NEK6	AP	8.02215e-06	1.3415e-05	-0.2545	Down
ID_41082	FAM134C	AP	8.3865e-06	1.40038e-05	0.259744	Up
ID_41083	FAM134C	AP	8.38873e-06	1.40046e-05	-0.0653493	Down
ID_87314	AKNA	AP	9.22886e-06	1.5324e-05	0.265301	Up
ID_70670	IL15	AP	1.05297e-05	1.74093e-05	-0.385964	Down
ID_70672	IL15	AP	1.05305e-05	1.74093e-05	0.102518	Up
ID_49023	FXYD3	AP	1.08096e-05	1.78486e-05	-0.207339	Down
ID_70248	INTS12	AP	1.10873e-05	1.82807e-05	-0.154664	Down
ID_70247	INTS12	AP	1.10916e-05	1.82841e-05	0.168978	Up
ID_21724	SLC11A2	AP	1.11859e-05	1.8432e-05	-0.0757044	Down
ID_26527	ZNF219	AP	1.13146e-05	1.86211e-05	0.449065	Up
ID_48242	OCEL1	AP	1.1356e-05	1.86853e-05	0.45832	Up
ID_48243	OCEL1	AP	1.13606e-05	1.8689e-05	-0.0711626	Down
ID_19416	FLI1	AP	1.24326e-05	2.0398e-05	-0.454493	Down
ID_84844	OXR1	AP	1.25098e-05	2.05098e-05	-0.334547	Down
ID_33212	MLST8	AP	1.26718e-05	2.07613e-05	-0.132998	Down
ID_33211	MLST8	AP	1.26722e-05	2.07613e-05	0.226634	Up
ID_7731	S100A13	AP	1.28749e-05	2.10761e-05	-0.329612	Down
ID_66990	MRAS	AP	1.3023e-05	2.13056e-05	-0.312995	Down
ID_27371	CTAGE5	AP	1.32337e-05	2.16236e-05	-0.279121	Down
ID_18695	CRYAB	AP	1.33567e-05	2.18106e-05	-0.504005	Down
ID_23640	GALNT4	AP	1.36735e-05	2.23013e-05	-0.0556152	Down
ID_23641	GALNT4	AP	1.36809e-05	2.23088e-05	0.379971	Up
ID_32875	NME4	AP	1.36912e-05	2.23211e-05	0.144636	Up
ID_44566	PTPRM	AP	1.37002e-05	2.23313e-05	-0.107908	Down
ID_84031	SGK3	AP	1.41409e-05	2.30074e-05	0.311022	Up
ID_84032	SGK3	AP	1.41409e-05	2.30074e-05	-0.28902	Down
ID_54533	KANSL3	AP	1.43432e-05	2.33222e-05	-0.0597317	Down
ID_26723	HOMEZ	AP	1.4617e-05	2.3716e-05	-0.488375	Down
ID_26724	HOMEZ	AP	1.4618e-05	2.3716e-05	0.109637	Up
ID_12469	STAMBPL1	AP	1.48766e-05	2.41259e-05	-0.350214	Down
ID_19413	FLI1	AP	1.48942e-05	2.41445e-05	0.0949118	Up
ID_54535	KANSL3	AP	1.51936e-05	2.461e-05	0.587044	Up
ID_31818	SCAMP5	AP	1.62065e-05	2.61923e-05	-0.358255	Down
ID_32168	ZFAND6	AP	1.66663e-05	2.6892e-05	-0.373246	Down
ID_49861	ZNF780A	AP	1.69046e-05	2.72436e-05	-0.344451	Down
ID_49859	ZNF780A	AP	1.69046e-05	2.72436e-05	0.0720955	Up
ID_36621	USB1	AP	1.70277e-05	2.74153e-05	0.0897957	Up
ID_36622	USB1	AP	1.70284e-05	2.74153e-05	-0.520999	Down
ID_30055	SPINT1	AP	1.82713e-05	2.93456e-05	-0.333904	Down
ID_30054	SPINT1	AP	1.82785e-05	2.93513e-05	0.088166	Up
ID_17950	PAK1	AP	1.83863e-05	2.95126e-05	-0.159801	Down
ID_17951	PAK1	AP	1.84021e-05	2.95319e-05	0.292636	Up
ID_74403	RNF145	AP	1.84058e-05	2.95319e-05	0.073497	Up
ID_26849	FITM1	AP	1.85203e-05	2.96964e-05	-0.121613	Down
ID_26850	FITM1	AP	1.85231e-05	2.96964e-05	0.509053	Up
ID_38199	GAS8	AP	1.92745e-05	3.08286e-05	0.352408	Up
ID_38200	GAS8	AP	1.92756e-05	3.08286e-05	-0.120428	Down
ID_26267	ING1	AP	1.98397e-05	3.16928e-05	-0.189922	Down
ID_47903	NFIX	AP	1.98619e-05	3.17219e-05	0.188262	Up
ID_68591	SH3BP2	AP	2.08009e-05	3.30829e-05	-0.44921	Down
ID_22353	ERBB3	AP	2.17139e-05	3.44871e-05	-0.272916	Down
ID_47122	STXBP2	AP	2.2646e-05	3.59348e-05	0.124289	Up
ID_47123	STXBP2	AP	2.26479e-05	3.59348e-05	-0.544643	Down
ID_38383	SMG6	AP	2.27115e-05	3.60286e-05	-0.115605	Down
ID_72985	APC	AP	2.42834e-05	3.8419e-05	0.126726	Up
ID_72984	APC	AP	2.42872e-05	3.8419e-05	-0.714031	Down
ID_32069	DNAJA4	AP	2.55254e-05	4.02529e-05	0.606597	Up
ID_76953	C6orf163	AP	2.70287e-05	4.24895e-05	0.194496	Up
ID_76954	C6orf163	AP	2.70287e-05	4.24895e-05	-0.248069	Down
ID_52493	SH3YL1	AP	3.03949e-05	4.75757e-05	0.255495	Up
ID_44432	METRNL	AP	3.07715e-05	4.81369e-05	0.105672	Up
ID_41953	FMNL1	AP	3.30365e-05	5.14746e-05	-0.355834	Down
ID_41952	FMNL1	AP	3.30403e-05	5.14746e-05	0.253545	Up
ID_63615	BTD	AP	3.33674e-05	5.19618e-05	0.388613	Up
ID_63617	BTD	AP	3.33725e-05	5.19618e-05	-0.0641455	Down
ID_87317	AKNA	AP	3.55659e-05	5.52695e-05	-0.185586	Down
ID_18143	SYTL2	AP	3.65077e-05	5.6634e-05	0.292725	Up
ID_14478	CYP2R1	AP	3.71211e-05	5.75633e-05	0.295118	Up
ID_18223	NOX4	AP	3.73485e-05	5.78934e-05	0.207526	Up
ID_47846	TNPO2	AP	3.80968e-05	5.90076e-05	0.207885	Up
ID_72564	PDE8B	AP	3.81195e-05	5.90293e-05	-0.49892	Down
ID_72565	PDE8B	AP	3.81256e-05	5.90293e-05	0.112829	Up
ID_72337	CCDC125	AP	3.95205e-05	6.10951e-05	0.0938637	Up
ID_72338	CCDC125	AP	3.95225e-05	6.10951e-05	-0.244221	Down
ID_8173	LMNA	AP	3.973e-05	6.13947e-05	-0.117931	Down
ID_25223	ULK1	AP	4.05544e-05	6.25756e-05	0.331217	Up
ID_25222	ULK1	AP	4.05568e-05	6.25756e-05	-0.140907	Down
ID_1855	GJA9	AP	4.0838e-05	6.2973e-05	0.145231	Up
ID_1856	GJA9	AP	4.0838e-05	6.2973e-05	-0.256596	Down
ID_23621	POC1B	AP	4.1504e-05	6.39507e-05	-0.235327	Down
ID_23620	POC1B	AP	4.15393e-05	6.39928e-05	0.0930375	Up
ID_21871	ACVRL1	AP	4.23169e-05	6.50926e-05	-0.327829	Down
ID_21870	ACVRL1	AP	4.23183e-05	6.50926e-05	0.120182	Up
ID_56566	MFSD6	AP	4.43853e-05	6.81279e-05	-0.381049	Down
ID_44503	TGIF1	AP	4.45862e-05	6.84231e-05	0.202234	Up
ID_65790	ST3GAL6	AP	4.50606e-05	6.91246e-05	-0.452974	Down
ID_62214	MAFF	AP	4.72161e-05	7.22235e-05	-0.105471	Down
ID_30507	SHC4	AP	4.79192e-05	7.32709e-05	-0.465298	Down
ID_30508	SHC4	AP	4.93118e-05	7.53283e-05	0.19107	Up
ID_1196	MTFR1L	AP	4.98365e-05	7.60428e-05	0.207257	Up
ID_52931	CGREF1	AP	5.42192e-05	8.25098e-05	-0.134963	Down
ID_20999	METTL20	AP	5.49849e-05	8.36431e-05	-0.150848	Down
ID_44433	METRNL	AP	5.92753e-05	8.98961e-05	-0.707128	Down
ID_73067	TNFAIP8	AP	6.00541e-05	9.10255e-05	-0.0631496	Down
ID_73057	SEMA6A	AP	6.13936e-05	9.30205e-05	-0.181658	Down
ID_44449	CLUL1	AP	6.16572e-05	9.33846e-05	0.358075	Up
ID_82256	TMEM176B	AP	6.18929e-05	9.37061e-05	-0.0511421	Down
ID_29606	BRF1	AP	6.65838e-05	0.000100367	-0.247706	Down
ID_61802	OSBP2	AP	6.79134e-05	0.000102279	-0.679152	Down
ID_62216	MAFF	AP	7.40534e-05	0.000111233	0.396941	Up
ID_62573	TTLL12	AP	7.54867e-05	0.000113081	0.580768	Up
ID_62574	TTLL12	AP	7.54956e-05	0.000113081	-0.0477239	Down
ID_52485	MZF1	AP	7.56704e-05	0.0001133	0.20396	Up
ID_52484	MZF1	AP	7.56961e-05	0.000113318	-0.114807	Down
ID_74316	MED7	AP	8.15652e-05	0.000121498	-0.09386	Down
ID_74317	MED7	AP	8.15705e-05	0.000121498	0.165954	Up
ID_80431	ERVW-1	AP	8.16823e-05	0.000121619	0.0743747	Up
ID_80432	ERVW-1	AP	8.17098e-05	0.000121637	-0.389329	Down
ID_73070	TNFAIP8	AP	8.77367e-05	0.000130028	0.474604	Up
ID_73412	SAR1B	AP	8.9853e-05	0.00013314	-0.200421	Down
ID_20692	PYROXD1	AP	9.02599e-05	0.000133694	-0.0482518	Down
ID_20693	PYROXD1	AP	9.026e-05	0.000133694	0.415345	Up
ID_87494	RABGAP1	AP	9.89459e-05	0.000146046	0.691005	Up
ID_90397	ZNF185	AP	0.000101945	0.000150251	0.565149	Up
ID_86872	CENPP	AP	0.000105848	0.000155745	0.16623	Up
ID_25849	SUCLA2	AP	0.000106972	0.000157282	0.135467	Up
ID_47797	ZNF799	AP	0.000110349	0.000162129	-0.0645578	Down
ID_47798	ZNF799	AP	0.000110377	0.00016214	0.315483	Up
ID_14263	ST5	AP	0.000118484	0.000173476	-0.363889	Down
ID_14454	FAR1	AP	0.000120281	0.000176053	-0.246152	Down
ID_14455	FAR1	AP	0.000120288	0.000176053	0.135165	Up
ID_84909	SYBU	AP	0.000122225	0.00017866	0.235617	Up
ID_43350	SLC16A5	AP	0.00012579	0.000183569	0.0905149	Up
ID_61071	2021-09-05	AP	0.000125986	0.000183806	0.0895668	Up
ID_61072	2021-09-05	AP	0.000125999	0.000183806	-0.233981	Down
ID_3308	SGIP1	AP	0.000137352	0.000199494	0.524832	Up
ID_88642	SH3KBP1	AP	0.000137847	0.00020014	0.253266	Up
ID_60546	TTC3	AP	0.000137942	0.000200243	-0.267173	Down
ID_78492	FAM120B	AP	0.000138135	0.000200487	0.0586961	Up
ID_44686	SLMO1	AP	0.000142579	0.000206636	0.274643	Up
ID_44851	TTC39C	AP	0.000142845	0.000206984	-0.45227	Down
ID_70811	LRBA	AP	0.000147646	0.000213516	0.112356	Up
ID_70810	LRBA	AP	0.00014768	0.000213526	-0.400374	Down
ID_22351	ERBB3	AP	0.000151093	0.000218224	0.19426	Up
ID_53725	WDPCP	AP	0.000156307	0.000225592	0.075029	Up
ID_28873	CCDC88C	AP	0.000156667	0.000226071	-0.156255	Down
ID_45786	SOCS6	AP	0.000158372	0.000228408	0.0835226	Up
ID_45787	SOCS6	AP	0.000158372	0.000228408	-0.469662	Down
ID_78491	FAM120B	AP	0.000165223	0.000237774	-0.389454	Down
ID_21001	METTL20	AP	0.000175517	0.000251909	0.234333	Up
ID_43347	SLC16A5	AP	0.000177947	0.000255075	-0.28372	Down
ID_78571	MICALL2	AP	0.000179602	0.000257205	-0.31126	Down
ID_78570	MICALL2	AP	0.000179625	0.000257205	0.146233	Up
ID_462	PLEKHG5	AP	0.000189577	0.000270583	0.279145	Up
ID_38014	RNF166	AP	0.000192573	0.000274467	0.396333	Up
ID_22063	MAP3K12	AP	0.000197995	0.000281643	0.181836	Up
ID_40516	TADA2A	AP	0.00023244	0.000328213	-0.0681083	Down
ID_40515	TADA2A	AP	0.000232457	0.000328213	0.275341	Up
ID_49414	ZNF567	AP	0.000235267	0.000332005	0.414471	Up
ID_1397	EPB41	AP	0.000240989	0.000339422	0.33534	Up
ID_1398	EPB41	AP	0.00024401	0.000343495	-0.0746699	Down
ID_22846	DPY19L2	AP	0.00024465	0.000344156	0.143758	Up
ID_22847	DPY19L2	AP	0.000244652	0.000344156	-0.234533	Down
ID_4178	RAP1A	AP	0.000249123	0.000350384	-0.0632265	Down
ID_27001	KHNYN	AP	0.000249454	0.000350664	0.175473	Up
ID_27000	KHNYN	AP	0.000249454	0.000350664	-0.209113	Down
ID_24126	APPL2	AP	0.000256329	0.000360139	-0.0690755	Down
ID_22260	DNAJC14	AP	0.000266506	0.000373688	0.0910417	Up
ID_22262	DNAJC14	AP	0.000266533	0.000373688	-0.137121	Down
ID_49415	ZNF567	AP	0.000266978	0.000374181	-0.274551	Down
ID_7557	GABPB2	AP	0.000278128	0.000389058	-0.0650067	Down
ID_7558	GABPB2	AP	0.00027819	0.000389077	0.534705	Up
ID_44497	TGIF1	AP	0.000287412	0.000401553	0.143395	Up
ID_35813	SULT1A1	AP	0.000290994	0.000406346	0.126763	Up
ID_32444	MESP2	AP	0.000296114	0.000413069	0.381392	Up
ID_32445	MESP2	AP	0.000296119	0.000413069	-0.25652	Down
ID_21946	CSAD	AP	0.000306175	0.000426725	0.212142	Up
ID_8084	ASH1L	AP	0.000313751	0.000436747	0.174229	Up
ID_8083	ASH1L	AP	0.000313803	0.000436747	-0.25979	Down
ID_16359	EML3	AP	0.000317021	0.00044092	0.211879	Up
ID_24156	RIC8B	AP	0.00032081	0.000445678	0.386541	Up
ID_24157	RIC8B	AP	0.000320833	0.000445678	-0.113555	Down
ID_62238	DDX17	AP	0.000348063	0.0004815	0.18487	Up
ID_62237	DDX17	AP	0.000348064	0.0004815	-0.120083	Down
ID_45135	MAPRE2	AP	0.000382181	0.000526326	0.0635964	Up
ID_26891	TM9SF1	AP	0.000382244	0.000526326	-0.0747949	Down
ID_26892	TM9SF1	AP	0.000382381	0.000526404	0.181024	Up
ID_26320	MCF2L	AP	0.000382498	0.000526404	0.428511	Up
ID_52930	CGREF1	AP	0.000390624	0.000537033	0.303186	Up
ID_68726	TBC1D14	AP	0.000412575	0.000565752	-0.198983	Down
ID_28874	CCDC88C	AP	0.000445616	0.000608453	0.189893	Up
ID_49477	HKR1	AP	0.000461322	0.000628932	0.0772505	Up
ID_19448	ARHGAP32	AP	0.000493286	0.000670964	0.818848	Up
ID_19447	ARHGAP32	AP	0.000493326	0.000670964	-0.0303686	Down
ID_40693	GRB7	AP	0.000494345	0.000672122	0.129252	Up
ID_43183	ABCA5	AP	0.000499478	0.00067887	0.0953944	Up
ID_43184	ABCA5	AP	0.00049962	0.000678946	-0.264028	Down
ID_42610	MSI2	AP	0.000508916	0.000691462	-0.0866792	Down
ID_83054	EGR3	AP	0.000521552	0.000707824	-0.0403916	Down
ID_83053	EGR3	AP	0.000521578	0.000707824	0.630099	Up
ID_61799	OSBP2	AP	0.000523836	0.000710619	0.142112	Up
ID_13182	DCLRE1A	AP	0.000523922	0.000710619	-0.0767785	Down
ID_13181	DCLRE1A	AP	0.000523993	0.000710619	0.445537	Up
ID_830	NBPF1	AP	0.000528748	0.000716704	0.12925	Up
ID_831	NBPF1	AP	0.000528878	0.000716758	-0.18421	Down
ID_88667	RPS6KA3	AP	0.000533272	0.000722591	0.164588	Up
ID_39172	KRBA2	AP	0.000569412	0.000769034	-0.0461402	Down
ID_39171	KRBA2	AP	0.000569469	0.000769034	0.286852	Up
ID_44294	CCDC57	AP	0.000603469	0.000812674	0.29254	Up
ID_44293	CCDC57	AP	0.000603512	0.000812674	-0.0670043	Down
ID_50208	PINLYP	AP	0.000612878	0.000824315	-0.2109	Down
ID_89231	PHF8	AP	0.000634573	0.000852062	0.295419	Up
ID_68729	TBC1D14	AP	0.000646172	0.000866152	0.177421	Up
ID_37473	PHLPP2	AP	0.000652721	0.000874375	-0.261583	Down
ID_43076	LRRC37A3	AP	0.000676389	0.000904566	-0.128199	Down
ID_71950	C5orf28	AP	0.000689015	0.00092082	0.149337	Up
ID_71951	C5orf28	AP	0.000689118	0.00092082	-0.0879533	Down
ID_11842	ANK3	AP	0.000696104	0.000929843	0.255602	Up
ID_30148	CAPN3	AP	0.000702097	0.000936598	-0.284429	Down
ID_44993	KCTD1	AP	0.000702743	0.000937303	-0.175327	Down
ID_37479	AP1G1	AP	0.000758398	0.00100689	0.0444298	Up
ID_37478	AP1G1	AP	0.000758438	0.00100689	-0.385811	Down
ID_7366	FMO5	AP	0.000769552	0.00101995	-0.0344825	Down
ID_7365	FMO5	AP	0.000769761	0.00102006	1.07909	Up
ID_72918	C5orf30	AP	0.000775151	0.00102635	-0.0579898	Down
ID_77269	FYN	AP	0.000863023	0.00113743	-0.111926	Down
ID_42490	TOB1	AP	0.000870759	0.00114725	0.433199	Up
ID_42491	TOB1	AP	0.000871671	0.00114826	-0.0327403	Down
ID_25240	EP400NL	AP	0.000891023	0.00117298	0.182373	Up
ID_16875	EHBP1L1	AP	0.00091058	0.00119813	0.146749	Up
ID_16876	EHBP1L1	AP	0.000910812	0.00119824	-0.114301	Down
ID_70465	PDE5A	AP	0.000917739	0.00120696	0.164358	Up
ID_84284	ZBTB10	AP	0.00093297	0.00122566	0.224415	Up
ID_84283	ZBTB10	AP	0.000933035	0.00122566	-0.0862518	Down
ID_30694	FAM214A	AP	0.000934684	0.00122728	-0.458011	Down
ID_30695	FAM214A	AP	0.000934729	0.00122728	0.124769	Up
ID_37557	ZFHX3	AP	0.000952901	0.0012499	0.0988175	Up
ID_37558	ZFHX3	AP	0.000953046	0.0012499	-0.451859	Down
ID_61833	LIMK2	AP	0.000985044	0.00129062	0.310724	Up
ID_61834	LIMK2	AP	0.000985066	0.00129062	-0.102785	Down
ID_70523	NUDT6	AP	0.00101227	0.00132366	0.266152	Up
ID_80314	TMEM243	AP	0.00102351	0.00133693	-0.533441	Down
ID_80315	TMEM243	AP	0.00102358	0.00133693	0.0755647	Up
ID_38715	MIS12	AP	0.00102612	0.00133959	0.0696105	Up
ID_38714	MIS12	AP	0.00102664	0.00134005	-0.22079	Down
ID_49423	ZNF345	AP	0.00105783	0.00137963	-0.203443	Down
ID_86038	IFT74	AP	0.00111498	0.00145061	0.215324	Up
ID_28366	ALDH6A1	AP	0.00115325	0.00149724	-0.160278	Down
ID_28367	ALDH6A1	AP	0.00115371	0.0014976	0.117004	Up
ID_88110	C9orf116	AP	0.00122612	0.0015867	-0.0705867	Down
ID_88112	C9orf116	AP	0.00122612	0.0015867	0.487129	Up
ID_44849	TTC39C	AP	0.00127263	0.00164342	-0.117357	Down
ID_42614	MSI2	AP	0.00133577	0.00171831	0.293251	Up
ID_53927	ZNF638	AP	0.00137199	0.00176179	-0.0474546	Down
ID_53926	ZNF638	AP	0.00137233	0.00176193	0.487039	Up
ID_52411	ZNF329	AP	0.00137291	0.00176216	-0.15842	Down
ID_52409	ZNF329	AP	0.00137294	0.00176216	0.212491	Up
ID_22297	DGKA	AP	0.00139858	0.00179363	-0.52365	Down
ID_82169	ZNF398	AP	0.00139962	0.00179467	0.202935	Up
ID_60191	RGS19	AP	0.00145607	0.00186264	0.369833	Up
ID_60190	RGS19	AP	0.00145612	0.00186264	-0.0521056	Down
ID_50277	ZNF225	AP	0.00146662	0.00187517	0.366754	Up
ID_50276	ZNF225	AP	0.00146692	0.00187526	-0.0438404	Down
ID_52696	GREB1	AP	0.00146814	0.00187651	0.125742	Up
ID_469	PLEKHG5	AP	0.00161079	0.00204838	-0.388909	Down
ID_11845	ANK3	AP	0.00161477	0.00205245	-0.180682	Down
ID_1469	SERINC2	AP	0.00171675	0.0021762	-0.0366027	Down
ID_90065	ELF4	AP	0.00173744	0.00220101	-0.128268	Down
ID_90066	ELF4	AP	0.0017377	0.00220101	0.129187	Up
ID_79097	SCRN1	AP	0.00176718	0.00223765	-0.0438744	Down
ID_88643	SH3KBP1	AP	0.00182386	0.00230431	0.310018	Up
ID_21944	CSAD	AP	0.0019147	0.00241109	0.169078	Up
ID_32067	DNAJA4	AP	0.00198971	0.0025012	0.186741	Up
ID_70105	SLC39A8	AP	0.00199638	0.0025088	-0.22857	Down
ID_25850	SUCLA2	AP	0.00202946	0.00254797	-0.0941557	Down
ID_68182	MUC20	AP	0.0020515	0.00257524	0.139595	Up
ID_68183	MUC20	AP	0.00205188	0.00257532	-0.213183	Down
ID_26397	GAS6	AP	0.00207742	0.00260409	-0.170451	Down
ID_25342	ZNF268	AP	0.00214531	0.00268278	0.399764	Up
ID_25341	ZNF268	AP	0.00214556	0.00268278	-0.0457082	Down
ID_70521	NUDT6	AP	0.00216403	0.00270504	-0.0925809	Down
ID_26526	ZNF219	AP	0.00218201	0.00272666	0.192831	Up
ID_75990	CPNE5	AP	0.00224622	0.00280379	-0.205647	Down
ID_75991	CPNE5	AP	0.00224688	0.00280379	0.265937	Up
ID_75022	MGAT1	AP	0.00230297	0.00286929	0.135215	Up
ID_63623	ANKRD28	AP	0.00233102	0.00289883	-0.1481	Down
ID_63624	ANKRD28	AP	0.00233102	0.00289883	0.228968	Up
ID_4176	RAP1A	AP	0.00234348	0.00291297	0.353943	Up
ID_39362	TRIM16	AP	0.00234591	0.00291537	-0.178859	Down
ID_39364	TRIM16	AP	0.00234615	0.00291537	0.239701	Up
ID_47195	SNAPC2	AP	0.00234833	0.00291726	-0.0789395	Down
ID_47196	SNAPC2	AP	0.00234839	0.00291726	0.240636	Up
ID_50269	ZNF223	AP	0.00237634	0.00295014	0.148596	Up
ID_50270	ZNF223	AP	0.00237634	0.00295014	-0.0925412	Down
ID_23705	SOCS2	AP	0.00255116	0.00315836	-0.231649	Down
ID_37881	GSE1	AP	0.00272781	0.00336883	-0.343119	Down
ID_37882	GSE1	AP	0.00272791	0.00336883	0.0593455	Up
ID_14941	CAPRIN1	AP	0.00280497	0.00345865	-0.141253	Down
ID_25173	AACS	AP	0.00290064	0.00356727	-0.0457435	Down
ID_73334	VDAC1	AP	0.00304527	0.00373445	-0.0287469	Down
ID_73335	VDAC1	AP	0.00304544	0.00373445	0.282619	Up
ID_7386	GJA5	AP	0.00311575	0.00381715	0.0642489	Up
ID_7385	GJA5	AP	0.00311625	0.00381717	-0.462249	Down
ID_83377	DDHD2	AP	0.0031967	0.00391153	-0.173027	Down
ID_83376	DDHD2	AP	0.00336412	0.00410196	0.070246	Up
ID_19840	SCNN1A	AP	0.00337096	0.00410924	-0.342058	Down
ID_78423	RPS6KA2	AP	0.00340747	0.00415165	-0.567133	Down
ID_85784	JAK2	AP	0.00354142	0.00429784	0.273157	Up
ID_73877	NR3C1	AP	0.00355266	0.00430981	-0.0898535	Down
ID_13489	LRRC27	AP	0.0035529	0.00430981	-0.67845	Down
ID_27372	CTAGE5	AP	0.00361572	0.0043807	-0.245545	Down
ID_3853	AGL	AP	0.00367769	0.00445309	-0.0412822	Down
ID_53428	PREPL	AP	0.00368729	0.00446357	0.170567	Up
ID_53429	PREPL	AP	0.00368747	0.00446357	-0.10002	Down
ID_48434	ISYNA1	AP	0.00380535	0.00459336	-0.380008	Down
ID_48435	ISYNA1	AP	0.0038056	0.00459336	0.0724804	Up
ID_60658	MX2	AP	0.00382971	0.00462037	0.115856	Up
ID_60659	MX2	AP	0.00383032	0.00462041	-0.278573	Down
ID_18408	CCDC82	AP	0.00388118	0.00467965	0.0926617	Up
ID_43438	GRB2	AP	0.00399217	0.0048084	-0.160087	Down
ID_37432	ZNF23	AP	0.00402967	0.00485085	-0.0947818	Down
ID_37430	ZNF23	AP	0.00402985	0.00485085	0.210792	Up
ID_9016	TNFSF4	AP	0.00404359	0.00486447	0.282465	Up
ID_9015	TNFSF4	AP	0.00404359	0.00486447	-0.0930836	Down
ID_41144	PSME3	AP	0.00408666	0.00491259	0.0486813	Up
ID_41143	PSME3	AP	0.00408788	0.00491332	-0.148404	Down
ID_28539	GPATCH2L	AP	0.0043073	0.00515953	0.149185	Up
ID_28538	GPATCH2L	AP	0.00430756	0.00515953	-0.307407	Down
ID_42074	NPEPPS	AP	0.00432543	0.00518016	-0.354308	Down
ID_14345	AMPD3	AP	0.0043451	0.00520293	0.465375	Up
ID_2081	CCDC30	AP	0.00437766	0.00523565	-0.283382	Down
ID_86896	SUSD3	AP	0.0044633	0.00533329	0.0740146	Up
ID_86897	SUSD3	AP	0.00446411	0.00533347	-0.225551	Down
ID_30305	CKMT1A	AP	0.00454128	0.00541935	0.0817786	Up
ID_30304	CKMT1A	AP	0.00454141	0.00541935	-0.204667	Down
ID_43439	GRB2	AP	0.00466471	0.00555558	0.0935378	Up
ID_26266	ING1	AP	0.00471644	0.00561481	0.164255	Up
ID_33364	CCDC64B	AP	0.00489184	0.00581152	-0.109733	Down
ID_87213	PTGR1	AP	0.00498265	0.00591501	0.108736	Up
ID_87215	PTGR1	AP	0.00498459	0.00591643	-0.052246	Down
ID_88105	PPP1R26	AP	0.00515149	0.00610638	0.182374	Up
ID_44558	ARHGAP28	AP	0.00523491	0.0062025	-0.249355	Down
ID_2079	CCDC30	AP	0.00528854	0.00626233	0.049956	Up
ID_85050	ZHX1	AP	0.0053798	0.00636379	-0.0417961	Down
ID_85049	ZHX1	AP	0.00538058	0.00636379	0.407831	Up
ID_59268	EPB41L1	AP	0.0053952	0.00637919	-0.141492	Down
ID_89232	PHF8	AP	0.00553678	0.00653789	-0.0617541	Down
ID_83209	ZNF395	AP	0.00562436	0.00663544	0.29668	Up
ID_87493	RABGAP1	AP	0.00577203	0.00679762	-0.0596395	Down
ID_14964	APIP	AP	0.00594027	0.00698419	0.068115	Up
ID_14963	APIP	AP	0.00594093	0.00698419	-0.26278	Down
ID_77379	PKIB	AP	0.00608765	0.00714513	0.226682	Up
ID_86040	IFT74	AP	0.00610015	0.0071577	-0.0557109	Down
ID_14692	NAV2	AP	0.00610725	0.00716498	0.472283	Up
ID_85785	JAK2	AP	0.00636703	0.00745118	-0.086347	Down
ID_72352	RAD17	AP	0.00644433	0.00753392	0.134625	Up
ID_61941	LARGE	AP	0.00649995	0.00759544	-0.500673	Down
ID_44554	ARHGAP28	AP	0.00650139	0.00759544	0.102193	Up
ID_31300	SMAD3	AP	0.0065107	0.00760373	-0.0348572	Down
ID_87528	NEK6	AP	0.00653824	0.00763145	0.281291	Up
ID_28872	GPR68	AP	0.00662616	0.00772956	0.474729	Up
ID_28871	GPR68	AP	0.00662798	0.00773055	-0.0346641	Down
ID_54105	LOXL3	AP	0.00663827	0.00773859	0.172446	Up
ID_54106	LOXL3	AP	0.00663874	0.00773859	-0.144896	Down
ID_68730	TBC1D14	AP	0.00676328	0.00787802	-0.0880594	Down
ID_46299	MADCAM1	AP	0.00694212	0.00807714	0.0709848	Up
ID_46298	MADCAM1	AP	0.0069423	0.00807714	-0.538542	Down
ID_8674	FCGR3A	AP	0.00694374	0.00807764	0.0544653	Up
ID_24127	APPL2	AP	0.00696512	0.00810015	0.186952	Up
ID_65583	FRMD4B	AP	0.00703409	0.00817443	-0.437386	Down
ID_65582	FRMD4B	AP	0.00703409	0.00817443	0.13539	Up
ID_66220	GRAMD1C	AP	0.00703704	0.00817666	0.359833	Up
ID_14940	CAPRIN1	AP	0.00704569	0.00818434	0.163356	Up
ID_44450	CLUL1	AP	0.00707685	0.00821576	0.232248	Up
ID_61939	LARGE	AP	0.00712409	0.0082682	0.0516099	Up
ID_59790	ADNP	AP	0.00719721	0.0083458	0.185285	Up
ID_82171	ZNF398	AP	0.00722937	0.00838188	-0.138755	Down
ID_32960	METRN	AP	0.00740439	0.00856387	-0.0996128	Down
ID_32961	METRN	AP	0.0074044	0.00856387	0.248149	Up
ID_22472	BAZ2A	AP	0.00757087	0.00873627	0.0948074	Up
ID_22471	BAZ2A	AP	0.00757107	0.00873627	-0.0766329	Down
ID_66223	GRAMD1C	AP	0.00757639	0.00873737	-0.159246	Down
ID_36339	SIAH1	AP	0.00767005	0.00884028	-0.154625	Down
ID_28500	JDP2	AP	0.00782026	0.00900433	0.118778	Up
ID_19180	SC5D	AP	0.00782748	0.0090093	0.046639	Up
ID_19179	SC5D	AP	0.00782795	0.0090093	-0.315528	Down
ID_35814	SULT1A1	AP	0.00801615	0.00920735	-0.256395	Down
ID_47760	ZNF700	AP	0.00869543	0.00994605	-0.0699087	Down
ID_47761	ZNF700	AP	0.00869658	0.00994605	0.11436	Up
ID_28557	ANGEL1	AP	0.0094283	0.0107329	-0.100477	Down
ID_28558	ANGEL1	AP	0.0094289	0.0107329	0.140123	Up
ID_19005	TMEM25	AP	0.00954258	0.0108561	-0.0983631	Down
ID_19006	TMEM25	AP	0.00954383	0.0108561	0.176575	Up
ID_84982	RAD21	AP	0.00960274	0.0109169	0.190215	Up
ID_17902	TSKU	AP	0.00979075	0.0111164	0.154215	Up
ID_17903	TSKU	AP	0.00979252	0.0111168	-0.122683	Down
ID_44051	ENDOV	AP	0.00992741	0.0112524	-0.143628	Down
ID_44050	ENDOV	AP	0.00992985	0.0112535	0.0675945	Up
ID_26162	FARP1	AP	0.0103285	0.0116821	0.215998	Up
ID_26163	FARP1	AP	0.01033	0.0116823	-0.0461977	Down
ID_25239	EP400NL	AP	0.0103677	0.0117232	0.222976	Up
ID_43143	PRKAR1A	AP	0.0105221	0.011881	0.0646737	Up
ID_31260	DIS3L	AP	0.010695	0.0120626	0.151101	Up
ID_31259	DIS3L	AP	0.010695	0.0120626	-0.11784	Down
ID_22061	MAP3K12	AP	0.0107981	0.0121699	-0.159744	Down
ID_56165	DFNB59	AP	0.0107993	0.0121699	-0.159606	Down
ID_56164	DFNB59	AP	0.0108008	0.0121699	0.109804	Up
ID_33867	UBN1	AP	0.0108515	0.0122253	0.0832762	Up
ID_22581	ARHGAP9	AP	0.011479	0.0128934	0.385643	Up
ID_26983	NFATC4	AP	0.0116231	0.0130487	-0.197587	Down
ID_85596	SLC39A4	AP	0.0116848	0.0131105	0.101721	Up
ID_85597	SLC39A4	AP	0.0116848	0.0131105	-0.110747	Down
ID_70103	SLC39A8	AP	0.012005	0.0134585	0.0616296	Up
ID_70466	PDE5A	AP	0.0120715	0.0135312	-0.27824	Down
ID_2948	TTC39A	AP	0.0122507	0.0137052	-0.100691	Down
ID_57555	STK36	AP	0.0124175	0.0138791	0.122779	Up
ID_57556	STK36	AP	0.0124187	0.0138791	-0.128375	Down
ID_45609	TCF4	AP	0.0124347	0.0138936	-0.146101	Down
ID_42661	SUPT4H1	AP	0.0129101	0.0143986	-0.135718	Down
ID_40651	PPP1R1B	AP	0.0130747	0.0145687	0.0291615	Up
ID_40650	PPP1R1B	AP	0.0130754	0.0145687	-0.197185	Down
ID_86074	APTX	AP	0.0132562	0.014764	-0.0723302	Down
ID_41927	DCAKD	AP	0.0133113	0.0148212	-0.0899747	Down
ID_65060	C3orf18	AP	0.0136624	0.0151804	-0.0992511	Down
ID_40506	ACACA	AP	0.0138974	0.0154202	0.156126	Up
ID_13411	CTBP2	AP	0.0139103	0.0154324	0.108448	Up
ID_40677	ERBB2	AP	0.0141664	0.0156925	0.0449277	Up
ID_37469	PHLPP2	AP	0.0141701	0.0156944	-0.273726	Down
ID_361	KCNAB2	AP	0.0142231	0.0157465	0.0787876	Up
ID_30671	ARPP19	AP	0.0144033	0.0159306	0.154698	Up
ID_85470	ZNF623	AP	0.0146242	0.0161615	0.247274	Up
ID_1632	KIAA1522	AP	0.015244	0.016796	-0.233932	Down
ID_90462	SLC6A8	AP	0.0152462	0.016796	-0.0417638	Down
ID_90463	SLC6A8	AP	0.0152466	0.016796	0.35225	Up
ID_18227	NOX4	AP	0.0156132	0.0171644	-0.0839987	Down
ID_30147	CAPN3	AP	0.0156559	0.0172043	-0.126699	Down
ID_32966	HAGHL	AP	0.0156919	0.0172391	0.0500867	Up
ID_32967	HAGHL	AP	0.0156919	0.0172391	-0.171741	Down
ID_14694	NAV2	AP	0.0157584	0.0173098	-0.432989	Down
ID_7455	C1orf54	AP	0.0157678	0.0173154	0.0524028	Up
ID_7454	C1orf54	AP	0.0157679	0.0173154	-0.186187	Down
ID_19899	LPAR5	AP	0.0160131	0.0175746	0.0870331	Up
ID_19900	LPAR5	AP	0.0160144	0.0175746	-0.265997	Down
ID_63747	TOP2B	AP	0.0162383	0.0177961	-0.313744	Down
ID_63746	TOP2B	AP	0.0162389	0.0177961	0.032715	Up
ID_3307	SGIP1	AP	0.0166204	0.0181967	-0.187277	Down
ID_49400	ZNF382	AP	0.0168041	0.0183827	-0.154013	Down
ID_49399	ZNF382	AP	0.0168073	0.0183838	0.108392	Up
ID_22770	LRIG3	AP	0.0168413	0.0184159	-0.0306971	Down
ID_22771	LRIG3	AP	0.0168413	0.0184159	0.240366	Up
ID_38013	RNF166	AP	0.017	0.0185818	-0.103805	Down
ID_70467	PDE5A	AP	0.0171052	0.0186917	-0.211929	Down
ID_60545	TTC3	AP	0.0171052	0.0186917	0.0530268	Up
ID_18144	SYTL2	AP	0.0171999	0.0187874	-0.152838	Down
ID_73829	PCDH1	AP	0.0172366	0.0188229	-0.0556346	Down
ID_73830	PCDH1	AP	0.0172371	0.0188229	0.319156	Up
ID_25775	LACC1	AP	0.0175298	0.0191192	-0.0853233	Down
ID_25776	LACC1	AP	0.0175311	0.0191192	0.100899	Up
ID_86790	S1PR3	AP	0.0176088	0.0191977	0.11907	Up
ID_86791	S1PR3	AP	0.0176091	0.0191977	-0.156637	Down
ID_40617	PLXDC1	AP	0.0178018	0.0193866	0.339408	Up
ID_22854	SRGAP1	AP	0.0181376	0.0197351	0.274208	Up
ID_22855	SRGAP1	AP	0.018139	0.0197351	-0.057292	Down
ID_50357	APOC1	AP	0.0181728	0.0197672	0.287877	Up
ID_50356	APOC1	AP	0.0181735	0.0197672	-0.064717	Down
ID_49424	ZNF345	AP	0.0182799	0.0198721	-0.193481	Down
ID_50448	FOSB	AP	0.018721	0.0203213	-0.0648882	Down
ID_50449	FOSB	AP	0.0187254	0.0203233	0.217699	Up
ID_88108	PPP1R26	AP	0.0187874	0.0203823	-0.0953758	Down
ID_86647	VPS13A	AP	0.0193831	0.0209489	0.112672	Up
ID_86646	VPS13A	AP	0.0193856	0.0209489	-0.161095	Down
ID_67415	SHOX2	AP	0.0194154	0.0209763	0.248784	Up
ID_67414	SHOX2	AP	0.0194162	0.0209763	-0.0706222	Down
ID_87662	SH2D3C	AP	0.0202095	0.0217452	0.157876	Up
ID_31819	SCAMP5	AP	0.0203774	0.0219076	0.0676374	Up
ID_17683	P2RY6	AP	0.020622	0.0221534	-0.229229	Down
ID_26268	ING1	AP	0.0209275	0.0224724	0.267827	Up
ID_78426	RPS6KA2	AP	0.0211323	0.0226681	0.0355226	Up
ID_23607	CEP290	AP	0.021782	0.0233124	-0.155351	Down
ID_23606	CEP290	AP	0.0217825	0.0233124	0.0575395	Up
ID_36338	SIAH1	AP	0.0224384	0.0239407	-0.15812	Down
ID_84026	C8orf44	AP	0.0228494	0.0243326	0.0442543	Up
ID_84027	C8orf44	AP	0.0228514	0.0243326	-0.276368	Down
ID_33362	CCDC64B	AP	0.0229889	0.0244758	0.180882	Up
ID_1631	KIAA1522	AP	0.0234245	0.0249031	0.0957222	Up
ID_86826	ROR2	AP	0.0242906	0.0257681	-0.148995	Down
ID_86825	ROR2	AP	0.0242929	0.0257681	0.0843538	Up
ID_74100	SYNPO	AP	0.0245039	0.0259816	0.0655327	Up
ID_7937	EFNA3	AP	0.0247313	0.0262019	0.157174	Up
ID_7936	EFNA3	AP	0.0247353	0.0262026	-0.0537884	Down
ID_42193	HOXB3	AP	0.0256466	0.0271213	0.0574306	Up
ID_43038	ICAM2	AP	0.026611	0.0280937	0.113324	Up
ID_43039	ICAM2	AP	0.0266118	0.0280937	-0.0350396	Down
ID_59789	ADNP	AP	0.026848	0.0283244	-0.202871	Down
ID_13047	GSTO2	AP	0.0268807	0.0283402	0.794279	Up
ID_13049	GSTO2	AP	0.0268807	0.0283402	-0.0455386	Down
ID_11054	ANKRD26	AP	0.0271472	0.0285927	-0.0887083	Down
ID_11053	ANKRD26	AP	0.0271487	0.0285927	0.14406	Up
ID_25170	AACS	AP	0.0273024	0.0287394	0.149752	Up
ID_22584	ARHGAP9	AP	0.0275195	0.0289374	-0.369272	Down
ID_23343	RAB3IP	AP	0.0275708	0.0289837	-0.0798599	Down
ID_60664	MX1	AP	0.0277812	0.0291667	0.0368903	Up
ID_24704	PRKAB1	AP	0.0280366	0.0294039	-0.0619176	Down
ID_24705	PRKAB1	AP	0.0280435	0.0294073	0.0791455	Up
ID_87177	AKAP2	AP	0.0282276	0.0295809	-0.119466	Down
ID_90395	ZNF185	AP	0.0284165	0.0297593	-0.402239	Down
ID_47088	VAV1	AP	0.0286985	0.0300311	-0.0354416	Down
ID_47087	VAV1	AP	0.0287049	0.0300339	0.271878	Up
ID_74101	SYNPO	AP	0.0287368	0.0300634	-0.256647	Down
ID_32177	FAH	AP	0.0287461	0.0300679	0.224182	Up
ID_32178	FAH	AP	0.0287486	0.0300679	-0.114216	Down
ID_66333	ADPRH	AP	0.0305828	0.0318468	0.0363656	Up
ID_66334	ADPRH	AP	0.0305848	0.0318468	-0.52693	Down
ID_59710	ZMYND8	AP	0.0364428	0.0375409	0.0367573	Up
ID_22832	MON2	AP	0.0366418	0.0377226	0.358052	Up
ID_22833	MON2	AP	0.0366428	0.0377226	-0.032759	Down
ID_41928	DCAKD	AP	0.036692	0.037763	0.0776264	Up
ID_65978	NXPE3	AP	0.0367085	0.037763	0.094988	Up
ID_88195	FAM69B	AP	0.0367096	0.037763	-0.137984	Down
ID_88196	FAM69B	AP	0.0367103	0.037763	0.0617385	Up
ID_37875	KIAA0513	AP	0.0370474	0.0380706	0.124841	Up
ID_65062	C3orf18	AP	0.0371432	0.0381592	0.182183	Up
ID_21464	ADCY6	AP	0.0374168	0.0384157	0.0461799	Up
ID_21465	ADCY6	AP	0.0374168	0.0384157	-0.191758	Down
ID_72376	OCLN	AP	0.0377882	0.0387621	-0.11115	Down
ID_72377	OCLN	AP	0.0378006	0.0387699	0.0331611	Up
ID_14349	AMPD3	AP	0.0380832	0.0390197	-0.249825	Down
ID_71319	ACSL1	AP	0.0382156	0.0391453	-0.259455	Down
ID_30670	ARPP19	AP	0.0385613	0.0394893	-0.0891579	Down
ID_8040	GBA	AP	0.038646	0.0395609	-0.0378627	Down
ID_8041	GBA	AP	0.0386461	0.0395609	0.075926	Up
ID_87406	CNTRL	AP	0.0389746	0.0398709	0.128631	Up
ID_87408	CNTRL	AP	0.0389788	0.0398709	-0.0506012	Down
ID_50638	C5AR2	AP	0.0393521	0.0402117	-0.0793195	Down
ID_50639	C5AR2	AP	0.0393521	0.0402117	0.151227	Up
ID_48851	C19orf12	AP	0.039406	0.040255	-0.0921203	Down
ID_48850	C19orf12	AP	0.0394144	0.040255	0.0662258	Up
ID_71316	ACSL1	AP	0.0399222	0.0407265	0.0704429	Up
ID_21721	SLC11A2	AP	0.0400547	0.0408461	0.433956	Up
ID_86208	IL11RA	AP	0.0405639	0.0413338	0.114609	Up
ID_1815	C1orf109	AP	0.0406606	0.0414214	-0.120368	Down
ID_1814	C1orf109	AP	0.0406617	0.0414214	0.0366831	Up
ID_83730	SLC20A2	AP	0.0406655	0.0414214	-0.152067	Down
ID_62789	TRABD	AP	0.0425108	0.0431582	0.125468	Up
ID_66440	PARP9	AP	0.0447914	0.0452451	-0.0372015	Down
ID_66439	PARP9	AP	0.0447927	0.0452451	0.0994726	Up
ID_85979	MLLT3	AP	0.0454546	0.045879	0.451601	Up
ID_52813	FAM228B	AP	0.0461422	0.0464909	0.140607	Up
ID_52812	FAM228B	AP	0.0461527	0.0464956	-0.0674802	Down
ID_77884	AHI1	AP	0.0466916	0.047003	-0.2051	Down
ID_65979	NXPE3	AP	0.0480492	0.0482446	-0.0840462	Down
ID_65190	PPM1M	AP	0.048511	0.0486532	-0.0829329	Down
ID_65191	PPM1M	AP	0.0485133	0.0486532	0.0934536	Up
ID_67496	B3GALNT1	AP	0.0498882	0.0499006	-0.0362427	Down
ID_60253	JAM2	AT	2.27401e-133	1.8192e-130	-0.362736	Down
ID_60254	JAM2	AT	2.27401e-133	1.8192e-130	1.28672	Up
ID_67616	CLDN11	AT	8.14387e-121	4.65399e-118	-0.856808	Down
ID_67617	CLDN11	AT	8.14448e-121	4.65399e-118	1.54566	Up
ID_28110	RAD51B	AT	8.26858e-105	2.44995e-102	2.12636	Up
ID_40349	RDM1	AT	5.25381e-104	1.44975e-101	-0.530506	Down
ID_40348	RDM1	AT	5.25534e-104	1.44975e-101	2.86967	Up
ID_87186	SVEP1	AT	5.22309e-98	1.19385e-95	1.99781	Up
ID_9493	NFASC	AT	3.04793e-97	6.59955e-95	1.95041	Up
ID_9492	NFASC	AT	3.05229e-97	6.59955e-95	-0.294279	Down
ID_75035	BTNL9	AT	2.04421e-95	4.3036e-93	1.05596	Up
ID_10715	ITIH5	AT	1.50086e-94	2.61022e-92	-0.624649	Down
ID_10716	ITIH5	AT	1.50088e-94	2.61022e-92	1.05388	Up
ID_14793	MPPED2	AT	9.84685e-94	1.5804e-91	-0.193579	Down
ID_14794	MPPED2	AT	9.87748e-94	1.5804e-91	1.21629	Up
ID_57462	PNKD	AT	4.33109e-90	6.6662e-88	-0.307257	Down
ID_57463	PNKD	AT	4.33303e-90	6.6662e-88	1.45622	Up
ID_88571	AP1S2	AT	3.81659e-85	4.62727e-83	-0.475845	Down
ID_88569	AP1S2	AT	3.81749e-85	4.62727e-83	1.36133	Up
ID_75037	BTNL9	AT	5.1554e-84	5.97728e-82	-0.667252	Down
ID_44550	L3MBTL4	AT	3.13928e-83	3.45143e-81	1.04003	Up
ID_44551	L3MBTL4	AT	3.14943e-83	3.45143e-81	-0.227062	Down
ID_50554	HIF3A	AT	3.58888e-83	3.87987e-81	0.92531	Up
ID_50552	HIF3A	AT	5.39436e-83	5.75399e-81	-0.561286	Down
ID_14577	SAA2	AT	1.77725e-82	1.84649e-80	2.20662	Up
ID_87187	SVEP1	AT	3.21968e-82	3.30224e-80	-0.207067	Down
ID_45395	RNF165	AT	1.32957e-77	1.17285e-75	1.37131	Up
ID_45394	RNF165	AT	1.33412e-77	1.17285e-75	-0.497337	Down
ID_11343	CXCL12	AT	6.38556e-76	5.37731e-74	-0.340061	Down
ID_87402	PHF19	AT	2.92787e-66	1.80547e-64	-0.664887	Down
ID_87401	PHF19	AT	2.93388e-66	1.80547e-64	1.06774	Up
ID_83387	PPAPDC1B	AT	8.0995e-64	4.43808e-62	0.559548	Up
ID_43100	PRKCA	AT	5.49447e-63	2.8095e-61	-0.284069	Down
ID_43101	PRKCA	AT	5.51365e-63	2.8095e-61	0.992707	Up
ID_22095	ATF7	AT	5.72157e-63	2.897e-61	0.978943	Up
ID_83388	PPAPDC1B	AT	1.5886e-61	7.56478e-60	-0.364901	Down
ID_39009	SOX15	AT	9.04816e-56	3.37674e-54	2.3052	Up
ID_39008	SOX15	AT	9.07499e-56	3.37674e-54	-0.18143	Down
ID_78911	ABCB5	AT	1.90924e-54	6.66983e-53	0.804351	Up
ID_12060	CDH23	AT	7.69064e-54	2.64056e-52	-0.970865	Down
ID_13806	CHID1	AT	1.89031e-53	6.17246e-52	-0.30699	Down
ID_13807	CHID1	AT	1.89032e-53	6.17246e-52	0.743775	Up
ID_19192	C11orf63	AT	3.89136e-52	1.18853e-50	0.785353	Up
ID_19191	C11orf63	AT	3.89243e-52	1.18853e-50	-0.225599	Down
ID_80362	STEAP4	AT	1.24028e-51	3.71704e-50	0.733676	Up
ID_80361	STEAP4	AT	1.24056e-51	3.71704e-50	-0.143559	Down
ID_50152	TMEM145	AT	2.55956e-50	7.39624e-49	-0.614403	Down
ID_50151	TMEM145	AT	2.56095e-50	7.39624e-49	1.66435	Up
ID_76534	HMGCLL1	AT	8.40029e-50	2.38363e-48	0.758215	Up
ID_76532	HMGCLL1	AT	8.40229e-50	2.38363e-48	-0.37065	Down
ID_62666	FBLN1	AT	1.51729e-49	4.18563e-48	-0.255471	Down
ID_3416	PTGER3	AT	9.39113e-48	2.36255e-46	1.1703	Up
ID_27142	NPAS3	AT	1.93468e-47	4.82328e-46	-0.12396	Down
ID_27143	NPAS3	AT	1.93534e-47	4.82328e-46	2.6981	Up
ID_60092	DIDO1	AT	4.82961e-47	1.18883e-45	0.674993	Up
ID_29171	SYNE3	AT	1.04705e-46	2.53064e-45	1.43694	Up
ID_29170	SYNE3	AT	1.0512e-46	2.53301e-45	-0.115964	Down
ID_11208	PARD3	AT	1.41329e-46	3.37502e-45	-0.298499	Down
ID_3297	LEPR	AT	5.52064e-46	1.28387e-44	0.750027	Up
ID_3295	LEPR	AT	1.57503e-45	3.5796e-44	-1.37605	Down
ID_72195	RNF180	AT	2.3075e-45	5.20092e-44	1.03757	Up
ID_72196	RNF180	AT	2.30791e-45	5.20092e-44	-0.166798	Down
ID_44053	ENDOV	AT	2.91043e-45	6.52198e-44	0.833697	Up
ID_62665	FBLN1	AT	6.39885e-45	1.41022e-43	0.374844	Up
ID_11207	PARD3	AT	7.66481e-45	1.68457e-43	0.698587	Up
ID_55356	ARHGEF4	AT	1.50858e-44	3.262e-43	0.705321	Up
ID_55355	ARHGEF4	AT	1.50867e-44	3.262e-43	-0.587834	Down
ID_89859	COL4A6	AT	2.43662e-44	5.17911e-43	1.75984	Up
ID_89858	COL4A6	AT	2.44065e-44	5.17911e-43	-0.426226	Down
ID_1111	NIPAL3	AT	4.95761e-44	1.04371e-42	-0.179725	Down
ID_83140	ADRA1A	AT	6.13058e-44	1.28726e-42	-2.83624	Down
ID_86634	PCSK5	AT	6.3113e-44	1.32174e-42	-0.213763	Down
ID_83135	ADRA1A	AT	1.5585e-43	3.23845e-42	1.03677	Up
ID_54927	NPHP1	AT	2.0974e-43	4.29137e-42	0.81121	Up
ID_54928	NPHP1	AT	2.09741e-43	4.29137e-42	-0.38656	Down
ID_7493	ENSA	AT	6.73421e-43	1.32694e-41	0.427179	Up
ID_55860	LRP2	AT	8.25204e-42	1.5274e-40	-0.181844	Down
ID_55859	LRP2	AT	8.26706e-42	1.5274e-40	1.86126	Up
ID_1109	NIPAL3	AT	1.01422e-41	1.8567e-40	0.89411	Up
ID_88296	EXD3	AT	4.38849e-40	7.40674e-39	0.541195	Up
ID_60091	DIDO1	AT	1.85213e-39	3.05506e-38	-0.244861	Down
ID_22094	ATF7	AT	1.96627e-39	3.23666e-38	-0.23247	Down
ID_44757	ZNF519	AT	7.68348e-39	1.22203e-37	0.671584	Up
ID_44054	ENDOV	AT	1.43232e-37	2.11024e-36	-0.340079	Down
ID_90013	GRIA3	AT	4.96035e-37	7.15006e-36	-0.808926	Down
ID_49134	DMKN	AT	8.65452e-36	1.1815e-34	0.629976	Up
ID_58720	KIF16B	AT	1.55083e-35	2.08154e-34	-0.247212	Down
ID_58721	KIF16B	AT	1.55335e-35	2.08154e-34	0.992985	Up
ID_43757	TMC6	AT	2.52809e-35	3.34847e-34	-0.47847	Down
ID_43758	TMC6	AT	2.53547e-35	3.35269e-34	0.278871	Up
ID_68107	IL1RAP	AT	1.2901e-34	1.64869e-33	-0.163481	Down
ID_49138	DMKN	AT	1.59269e-34	2.01926e-33	-0.230649	Down
ID_72388	GTF2H2C	AT	2.68687e-34	3.39573e-33	-0.136354	Down
ID_78950	KLHL7	AT	3.61968e-34	4.56742e-33	-0.216208	Down
ID_84556	RAD54B	AT	4.0469e-34	5.09046e-33	-0.923147	Down
ID_84553	RAD54B	AT	4.04692e-34	5.09046e-33	0.495686	Up
ID_40931	JUP	AT	5.64811e-34	7.03897e-33	-1.2781	Down
ID_40930	JUP	AT	5.64877e-34	7.03897e-33	0.351837	Up
ID_80250	HGF	AT	6.74791e-34	8.38249e-33	0.913839	Up
ID_11435	SYT15	AT	3.69835e-33	4.463e-32	0.426402	Up
ID_11433	SYT15	AT	3.69871e-33	4.463e-32	-0.257902	Down
ID_78952	KLHL7	AT	4.57275e-33	5.48456e-32	0.531848	Up
ID_53367	MTA3	AT	5.1314e-33	6.14113e-32	0.461397	Up
ID_53366	MTA3	AT	5.13592e-33	6.14113e-32	-0.609318	Down
ID_47878	MAST1	AT	1.05162e-32	1.23564e-31	1.85004	Up
ID_47879	MAST1	AT	1.05184e-32	1.23564e-31	-0.469448	Down
ID_80091	GTF2IRD2	AT	1.39773e-32	1.63238e-31	-0.29721	Down
ID_28797	EFCAB11	AT	2.03016e-32	2.33352e-31	0.652697	Up
ID_52283	ZNF549	AT	3.26818e-32	3.72041e-31	0.414957	Up
ID_52284	ZNF549	AT	3.26931e-32	3.72041e-31	-0.0971191	Down
ID_72389	GTF2H2C	AT	4.15256e-32	4.67894e-31	0.910137	Up
ID_80248	HGF	AT	9.8497e-32	1.10052e-30	-0.307803	Down
ID_28799	EFCAB11	AT	1.30673e-31	1.44191e-30	-0.165204	Down
ID_49558	ZFP30	AT	3.46842e-31	3.76579e-30	0.357227	Up
ID_49559	ZFP30	AT	3.46923e-31	3.76579e-30	-0.874712	Down
ID_26031	PCDH9	AT	7.23523e-31	7.71845e-30	0.700436	Up
ID_26032	PCDH9	AT	7.23605e-31	7.71845e-30	-0.637319	Down
ID_11238	CREM	AT	7.51848e-31	8.00903e-30	0.536923	Up
ID_86632	PCSK5	AT	1.08744e-30	1.15378e-29	1.41291	Up
ID_10369	ERO1LB	AT	1.31069e-30	1.37788e-29	0.26353	Up
ID_10370	ERO1LB	AT	1.31071e-30	1.37788e-29	-0.366394	Down
ID_11237	CREM	AT	1.31371e-30	1.37922e-29	-0.234925	Down
ID_47221	KANK3	AT	1.79777e-30	1.87112e-29	0.643421	Up
ID_47222	KANK3	AT	1.79861e-30	1.87112e-29	-0.328594	Down
ID_44756	ZNF519	AT	4.80197e-30	4.84436e-29	-0.272752	Down
ID_14508	PLEKHA7	AT	7.54725e-30	7.46375e-29	-0.424965	Down
ID_14509	PLEKHA7	AT	7.54771e-30	7.46375e-29	0.502219	Up
ID_3129	CYB5RL	AT	1.49953e-29	1.45763e-28	-0.233188	Down
ID_3128	CYB5RL	AT	1.49954e-29	1.45763e-28	1.28389	Up
ID_29201	AK7	AT	1.53007e-29	1.48051e-28	0.621745	Up
ID_29200	AK7	AT	1.53048e-29	1.48051e-28	-0.447015	Down
ID_90014	GRIA3	AT	2.80941e-29	2.67244e-28	0.890742	Up
ID_51718	ZNF765	AT	3.14655e-29	2.98605e-28	0.288274	Up
ID_86615	TRPM6	AT	4.62703e-29	4.33954e-28	-0.733465	Down
ID_89905	ALG13	AT	4.79877e-29	4.49054e-28	0.282129	Up
ID_89906	ALG13	AT	4.79927e-29	4.49054e-28	-0.351757	Down
ID_548	CA6	AT	7.67684e-29	7.13938e-28	1.05294	Up
ID_24898	RHOF	AT	8.32063e-29	7.70393e-28	0.251608	Up
[truncated: 2,466 more rows]

## Sheet: Table S6
Table S6. Survival-related IGAS events and parent genes.
AS base information				Differential AS analysis results				Univariate Cox regression analysis results
AS ID	Gene Symbol	AS Type		P-values	log2 (FC)	Regulation		P-values	HR	Low 95%CI	High 95%CI
ID_10005	H3F3A	AP		1.4656e-08	0.42287	Up		0.0060679	0.571556	0.3833	0.852274
ID_10053	ZNF678	ES		8.59607e-06	0.12552	Up		0.0357531	1.58217	1.03101	2.42796
ID_101031	STRN3	ES		3.13365e-15	0.45689	Up		0.00781441	0.583902	0.3928	0.867977
ID_102199	IFI44	ES		2.84838e-21	-0.276786	Down		0.0295947	0.642394	0.431165	0.957107
ID_10650	AKR1C2	AT		0.00114653	-0.310747	Down		0.00870661	1.69568	1.14287	2.51589
ID_10651	AKR1C2	AT		0.00114704	0.04395	Up		0.00870661	0.589733	0.397473	0.87499
ID_11172	CCDC7	ES		0.0142693	0.0768069	Up		0.0181614	0.623439	0.421248	0.922676
ID_11214	PARD3	AD		3.95462e-19	0.366396	Up		0.035684	1.54533	1.02955	2.3195
ID_11230	CREM	AP		2.25831e-09	0.587017	Up		0.0361547	0.653697	0.439206	0.972937
ID_11315	RET	AT		1.7455e-13	-0.217957	Down		0.00762834	1.71473	1.15387	2.54821
ID_11316	RET	AT		1.74561e-13	0.222237	Up		0.00762834	0.583181	0.392432	0.866648
ID_11842	ANK3	AP		0.000696104	0.255602	Up		0.000294749	0.45773	0.299811	0.698829
ID_11845	ANK3	AP		0.00161477	-0.180682	Down		0.00066051	2.08493	1.36598	3.18228
ID_12731	MORN4	AT		2.63578e-08	-0.0808887	Down		0.0328777	1.5471	1.03615	2.31001
ID_12946	NFKB2	AP		1.30661e-09	-0.0985582	Down		0.041794	1.54284	1.01624	2.34232
ID_12947	NFKB2	AP		1.30548e-09	0.454956	Up		0.0385147	0.643443	0.42378	0.976965
ID_13012	CALHM2	AA		9.18385e-06	0.176286	Up		0.0173913	1.64321	1.09129	2.47426
ID_13344	TACC2	ES		1.4461e-11	0.28833	Up		0.0155421	0.613756	0.413292	0.911453
ID_13458	PTPRE	AP		1.7598e-27	0.939792	Up		0.0177405	0.61687	0.413769	0.919663
ID_13720	IRF7	RI		0.00303388	-0.188518	Down		0.0233135	0.627213	0.419145	0.938567
ID_13865	LSP1	AP		4.66707e-46	1.07256	Up		0.0354995	1.52886	1.02922	2.27105
ID_13979	ZNF195	ES		4.68906e-11	1.03382	Up		0.00292147	1.85005	1.23371	2.7743
ID_14003	PGAP2	AD		0.00381575	0.137494	Up		0.0211761	0.622594	0.416104	0.931552
ID_14004	PGAP2	AD		5.015e-11	0.290697	Up		0.00798572	0.580607	0.388528	0.867643
ID_14097	PRKCDBP	ES		1.11152e-19	-0.839771	Down		0.0345768	1.5452	1.03207	2.31345
ID_14941	CAPRIN1	AP		0.00280497	-0.141253	Down		0.00431822	0.549729	0.364496	0.829095
ID_152981	CD74	ES		1.22664e-11	-0.185527	Down		0.000782914	2.01566	1.33899	3.03429
ID_155897	KIAA0753	ME		2.97112e-12	-0.64785	Down		0.0169252	0.613246	0.410543	0.916032
ID_15692	NR1H3	AP		3.657e-55	1.16129	Up		0.00577577	1.78149	1.18225	2.68445
ID_15695	NR1H3	AP		4.82261e-13	-0.524787	Down		0.00185773	0.518976	0.34336	0.784414
ID_15792	AGBL2	AT		0.0187534	0.190489	Up		0.00425485	1.86485	1.21642	2.85896
ID_15919	TMX2	ES		4.13765e-06	-0.359288	Down		0.00488277	0.563622	0.378086	0.840204
ID_16164	CYB561A3	AA		5.38424e-30	-0.497677	Down		0.0382884	0.656715	0.441172	0.977565
ID_17328	MTL5	AT		5.83613e-14	-0.29556	Down		0.0427933	1.50799	1.01342	2.24392
ID_17329	MTL5	AT		5.83729e-14	0.205577	Up		0.0427933	0.663133	0.445648	0.986754
ID_17371	ORAOV1	RI		0.00078656	0.263033	Up		0.0299664	0.6438	0.432569	0.958178
ID_17513	NUMA1	AP		2.81087e-08	-0.137112	Down		0.0431137	0.665893	0.449033	0.987485
ID_17518	NUMA1	ES		1.11479e-12	-0.0818066	Down		0.0152966	0.612794	0.41251	0.91032
ID_1765	SH3D21	AT		4.52884e-07	0.475317	Up		0.00393585	0.552689	0.36934	0.827057
ID_1766	SH3D21	AT		4.5271e-07	-0.146364	Down		0.00393585	1.80934	1.20911	2.70754
ID_17897	LRRC32	AP		1.35648e-60	-0.461919	Down		0.041947	0.663532	0.446901	0.985172
ID_17898	LRRC32	AP		1.3562e-60	1.22025	Up		0.0278792	1.56733	1.05006	2.33942
ID_18039	RAB30	AP		4.01932e-56	-2.43043	Down		0.0170032	0.61458	0.412053	0.916648
ID_18688	C11orf1	AP		3.98796e-20	-0.164901	Down		0.0382465	1.53048	1.02332	2.28898
ID_18823	RBM7	RI		1.70487e-24	0.519491	Up		0.0292238	0.640891	0.429642	0.956009
ID_18902	PCSK7	RI		0.0231021	-0.224252	Down		0.0156705	0.610865	0.409572	0.911087
ID_1911	BMP8B	AT		2.07602e-06	-0.384109	Down		0.00217045	0.528477	0.351528	0.794496
ID_1912	BMP8B	AT		2.07616e-06	0.13611	Up		0.00145021	1.94795	1.29226	2.93634
ID_19179	SC5D	AP		0.00782795	-0.315528	Down		0.0473245	0.662982	0.441683	0.995158
ID_19180	SC5D	AP		0.00782748	0.046639	Up		0.0473245	1.50834	1.00487	2.26407
ID_19191	C11orf63	AT		3.89243e-52	-0.225599	Down		0.0156506	0.612803	0.41196	0.911563
ID_19192	C11orf63	AT		3.89136e-52	0.785353	Up		0.00972584	1.69148	1.13559	2.51948
ID_200809	COL1A2	ES		0.000291246	0.122827	Up		0.0254075	0.63297	0.423858	0.94525
ID_20692	PYROXD1	AP		9.02599e-05	-0.0482518	Down		0.0102889	1.67949	1.13026	2.49561
ID_20693	PYROXD1	AP		9.026e-05	0.415345	Up		0.0102889	0.595418	0.400704	0.884749
ID_20699	PYROXD1	ES		3.32995e-07	0.483175	Up		0.0271528	0.638852	0.429303	0.950686
ID_20726	ST8SIA1	AT		1.94119e-06	0.138126	Up		0.0280019	1.56152	1.04931	2.32377
ID_20727	ST8SIA1	AT		1.94156e-06	-0.392499	Down		0.0280019	0.640401	0.430334	0.95301
ID_21045	DNM1L	ES		2.11733e-17	-0.280191	Down		0.00988415	0.591152	0.396511	0.88134
ID_21047	DNM1L	ES		1.70748e-05	-0.163673	Down		0.02196	0.626027	0.419355	0.934554
ID_21048	DNM1L	ES		5.13209e-15	-0.31739	Down		0.0278002	0.63701	0.426255	0.95197
ID_21429	PFKM	ES		8.36455e-17	0.296496	Up		0.0206009	0.624873	0.41968	0.930391
ID_21469	CACNB3	AP		3.39697e-10	0.285284	Up		0.0406138	1.51796	1.01799	2.26349
ID_22101	ATP5G2	ES		3.35793e-10	-0.248567	Down		0.0366899	0.653514	0.438468	0.974029
ID_222	SLC35E2	AT		5.27791e-12	0.388117	Up		0.0157745	0.615268	0.414771	0.912683
ID_223	SLC35E2	AT		5.27771e-12	-0.302447	Down		0.0192811	1.60166	1.07951	2.37638
ID_22334	SUOX	AP		4.54036e-12	-0.119052	Down		0.0220096	1.59324	1.06947	2.37354
ID_22351	ERBB3	AP		0.000151093	0.19426	Up		0.0453238	1.49532	1.00841	2.21732
ID_22391	SMARCC2	AD		1.07589e-32	0.635909	Up		0.0139178	1.65366	1.10754	2.46908
ID_22471	BAZ2A	AP		0.00757107	-0.0766329	Down		0.00158674	0.528631	0.355917	0.785155
ID_22472	BAZ2A	AP		0.00757087	0.0948074	Up		0.0434771	1.51032	1.01215	2.25369
ID_22584	ARHGAP9	AP		0.0275195	-0.369272	Down		0.00291154	1.87244	1.23896	2.82981
ID_23620	POC1B	AP		4.15393e-05	0.0930375	Up		0.00957893	1.69973	1.13785	2.53905
ID_23621	POC1B	AP		4.1504e-05	-0.235327	Down		0.00957253	0.588302	0.393829	0.878806
ID_24127	APPL2	AP		0.00696512	0.186952	Up		0.0111401	0.597399	0.401332	0.889252
ID_24375	GIT2	AA		5.23808e-14	0.357962	Up		0.00538977	0.567594	0.380892	0.845813
ID_24536	ACAD10	ES		0.000373394	0.272191	Up		0.0117067	0.596888	0.399623	0.891529
ID_24572	NAA25	ES		1.39451e-09	-0.332352	Down		0.000647945	0.49469	0.330127	0.741284
ID_25050	MPHOSPH9	AT		0.0163788	0.107414	Up		0.00286581	0.546396	0.367255	0.81292
ID_25051	MPHOSPH9	AT		0.0163767	-0.0796029	Down		0.00286581	1.83017	1.23013	2.72291
ID_25173	AACS	AP		0.00290064	-0.0457435	Down		0.00843804	1.70236	1.14585	2.52915
ID_25222	ULK1	AP		4.05568e-05	-0.140907	Down		0.0451623	1.5049	1.00885	2.24486
ID_25223	ULK1	AP		4.05544e-05	0.331217	Up		0.0451623	0.664497	0.445463	0.991229
ID_25551	PAN3	AP		1.59175e-11	0.286139	Up		0.046727	0.667115	0.44766	0.994155
ID_25552	PAN3	ES		0.00121151	-0.0650661	Down		0.0149897	0.613786	0.414212	0.909518
ID_25623	DCLK1	AT		5.73525e-07	0.0789865	Up		0.017699	0.615261	0.41186	0.919112
ID_25624	DCLK1	AT		5.73858e-07	-0.421784	Down		0.017699	1.62533	1.08801	2.42801
ID_26266	ING1	AP		0.00471644	0.164255	Up		0.0165029	0.614511	0.412724	0.914956
ID_26795	DHRS4L2	AP		1.80946e-22	-0.230773	Down		0.0463655	0.669653	0.451342	0.993562
ID_26796	DHRS4L2	AP		1.80934e-22	0.639696	Up		0.0463655	1.49331	1.00648	2.21562
ID_27003	KHNYN	AD		0.0138147	0.127885	Up		0.00586029	0.574622	0.387465	0.852181
ID_27107	HECTD1	AD		0.000233455	0.174791	Up		0.0393257	0.660256	0.44488	0.979899
ID_28310	ELMSAN1	AP		6.8533e-35	0.728368	Up		0.00311745	0.547068	0.36673	0.816088
ID_28457	PGF	ES		6.07652e-09	0.200963	Up		0.0220547	1.58641	1.06866	2.35499
ID_28481	ZC2HC1C	AD		0.000320462	-0.171758	Down		0.00650819	0.569856	0.38005	0.854454
ID_29103	SERPINA1	RI		1.01843e-40	-0.113218	Down		0.0340648	0.649515	0.435781	0.968076
ID_29104	SERPINA1	RI		2.74597e-24	-0.102677	Down		0.00855403	0.578545	0.384752	0.869948
ID_29130	SERPINA1	ES		1.16354e-22	-0.942447	Down		0.00981925	0.59046	0.395834	0.880782
ID_29208	PAPOLA	RI		4.20258e-14	-0.329194	Down		0.0336233	0.651443	0.438704	0.967343
ID_29358	MOK	AP		4.72085e-16	0.358246	Up		0.00902701	1.69736	1.14102	2.52496
ID_29605	BRF1	AP		5.95566e-06	-0.355999	Down		0.0249046	0.635912	0.428148	0.944497
ID_29608	BRF1	AP		1.897e-11	0.218946	Up		0.0224631	1.58296	1.06705	2.34833
ID_29789	MTMR10	RI		9.30659e-19	0.320238	Up		0.0287307	0.64295	0.432794	0.955155
ID_300061	ATP5A1	ES		0.00345798	0.470963	Up		0.0177609	0.618902	0.416233	0.920253
ID_300062	ATP5A1	ES		7.50721e-09	0.529256	Up		0.0121306	0.601422	0.404234	0.894798
ID_3037	ECHDC2	ES		0.0237464	-0.282083	Down		0.0107462	1.68647	1.1287	2.51988
ID_306251	COL1A2	ES		2.51538e-09	-0.124641	Down		0.042793	1.51655	1.01361	2.26903
ID_306303	COL3A1	ES		0.0147938	0.0939804	Up		0.0337573	0.650796	0.437736	0.967558
ID_306304	COL3A1	ES		0.0116261	0.0948269	Up		0.0016616	0.514049	0.339543	0.77824
ID_30670	ARPP19	AP		0.0385613	-0.0891579	Down		0.0133463	0.61065	0.41316	0.902539
ID_30742	PRTG	AT		0.000359827	-0.0882457	Down		0.00851306	1.72328	1.1489	2.58481
ID_30743	PRTG	AT		0.000359837	0.538944	Up		0.00851306	0.580288	0.386875	0.870395
ID_31228	VWA9	AD		4.52267e-08	0.305591	Up		0.00398301	0.553941	0.370552	0.82809
ID_3132	CYB5RL	ES		3.18975e-09	0.186107	Up		0.0149562	0.608735	0.408132	0.907938
ID_31634	PML	RI		0.00358226	-0.306623	Down		0.0247899	1.5873	1.06035	2.3761
ID_32098	HYKK	AT		6.07608e-06	-0.299401	Down		0.0184789	1.60784	1.08308	2.38684
ID_32168	ZFAND6	AP		1.66663e-05	-0.373246	Down		0.0389462	1.52926	1.02179	2.28875
ID_32179	FAH	RI		0.0493358	-0.0831775	Down		0.047696	0.669316	0.449814	0.995932
ID_32219	FAM154B	AT		7.29144e-06	0.256399	Up		0.0248146	0.635028	0.427139	0.944098
ID_32395	ACAN	AT		2.31084e-24	0.820879	Up		0.0342869	1.53381	1.03218	2.27923
ID_32396	ACAN	AT		2.31102e-24	-1.26587	Down		0.0342869	0.651972	0.438744	0.968826
ID_32441	WDR93	AT		3.75814e-14	0.37443	Up		0.0276765	1.55659	1.04981	2.30801
ID_32442	WDR93	AT		3.75763e-14	-0.327568	Down		0.0276765	0.64243	0.433274	0.952553
ID_32813	NPRL3	ES		1.1127e-12	-0.243939	Down		0.00184989	0.529757	0.355117	0.79028
ID_32816	NPRL3	ES		1.28567e-20	-0.116784	Down		0.0249598	0.632069	0.423247	0.943919
ID_32873	NME4	AP		2.55909e-06	-0.394178	Down		0.024616	1.58037	1.06028	2.35558
ID_33047	TPSAB1	RI		3.25523e-14	-0.249224	Down		0.0171013	1.693	1.09828	2.60978
ID_33077	UNKL	AP		1.05581e-27	1.55439	Up		0.00136989	1.97399	1.30167	2.99355
ID_33573	ZNF174	RI		0.00273323	0.220967	Up		0.0386199	1.51506	1.02198	2.24604
ID_33607	DNASE1	AT		4.83257e-07	-0.255925	Down		0.0111931	0.585727	0.387437	0.885503
ID_34149	NPIPA5	AD		2.10288e-14	0.31301	Up		0.0406471	1.51737	1.01791	2.26189
ID_34150	NPIPA5	ES		3.74764e-59	0.908005	Up		0.0288288	1.55731	1.04683	2.31673
ID_34192	FOPNL	ES		9.84184e-08	-0.0922082	Down		0.0142342	0.601941	0.401138	0.903263
ID_34293	SYT17	AT		0.0308112	0.0514087	Up		0.0177493	1.61085	1.08613	2.38908
ID_34294	SYT17	AT		0.0308104	-0.11808	Down		0.0156576	0.615151	0.414812	0.912246
ID_34318	CCP110	ES		0.00033039	0.148699	Up		0.0229067	1.63111	1.0701	2.48624
ID_35570	NPIPB5	RI		0.0134539	0.0825923	Up		0.000779421	0.499758	0.333457	0.748997
ID_35626	DCTN5	ES		0.00320076	-0.073766	Down		0.0454011	0.667192	0.448848	0.991751
ID_35670	LCMT1	ES		0.00484932	0.205048	Up		0.0165291	0.612399	0.41011	0.91447
ID_35954	PRRT2	RI		3.04544e-10	0.327386	Up		0.0404636	1.53652	1.01884	2.31724
ID_36005	INO80E	ES		8.18551e-06	-0.598555	Down		0.0242211	0.627342	0.418209	0.941056
ID_36399	CYLD	AD		7.00109e-16	0.48706	Up		0.0197173	0.62433	0.420188	0.927651
ID_37203	PLA2G15	ES		0.000484499	0.309527	Up		0.00837624	0.577542	0.384014	0.868601
ID_37212	SLC7A6	ES		1.22904e-14	-0.629004	Down		0.0222481	0.630764	0.424898	0.936372
ID_37688	DYNLRB2	AP		1.01133e-28	1.04644	Up		0.0493097	1.49489	1.00122	2.23199
ID_37689	DYNLRB2	AP		1.01105e-28	-0.247308	Down		0.00485558	0.561729	0.376031	0.839132
ID_37739	CENPN	AT		3.12864e-08	-0.201744	Down		0.00242	1.84855	1.24283	2.74948
ID_37740	CENPN	AT		1.10483e-08	0.276971	Up		0.00102405	0.512939	0.344364	0.764036
ID_37883	GSE1	ES		7.10981e-14	-0.223749	Down		0.0131589	0.609801	0.412461	0.901559
ID_3793	BCAR3	AP		4.67489e-24	0.917723	Up		0.0237855	0.634068	0.427153	0.941213
ID_38382	SMG6	AP		4.59408e-09	0.25369	Up		0.0402451	0.660027	0.443763	0.981685
ID_38395	SGSM2	RI		1.57162e-20	0.493125	Up		0.00961333	0.588586	0.394073	0.879109
ID_38575	ARRB2	ES		0.0223246	-0.230779	Down		0.0109999	0.598742	0.403211	0.889094
ID_3858	SLC35A3	AP		2.4516e-29	-0.359826	Down		0.0180971	0.620389	0.417578	0.921703
ID_38634	CAMTA2	ES		0.0145808	-0.0785969	Down		0.0186884	0.623655	0.420771	0.924365
ID_38638	CAMTA2	AA		0.000257853	-0.188383	Down		0.0474644	0.671268	0.452614	0.995552
ID_39052	DNAH2	AT		0.0261671	0.111882	Up		0.0461921	0.667699	0.448874	0.993202
ID_39053	DNAH2	AT		0.026166	-0.142728	Down		0.0468128	1.49599	1.00569	2.22531
ID_39067	CHD3	AP		3.80828e-09	0.672092	Up		0.0196358	1.65193	1.08361	2.51831
ID_39068	CHD3	AP		3.81073e-09	-0.122955	Down		0.0196358	0.605352	0.397091	0.922838
ID_39356	TVP23C	AT		8.48656e-08	-0.143228	Down		0.0260355	1.57785	1.05596	2.35768
ID_39500	SREBF1	AP		1.03637e-15	0.308277	Up		0.0403264	1.51237	1.01841	2.2459
ID_39501	SREBF1	AP		1.03628e-15	-0.543638	Down		0.0403264	0.661215	0.445255	0.981921
ID_39528	LRRC48	AT		3.34094e-10	0.129366	Up		0.0491374	0.670793	0.450643	0.998492
ID_39529	LRRC48	AT		3.34061e-10	-0.61254	Down		0.0491374	1.49077	1.00151	2.21905
ID_39775	ULK2	AT		0.0232289	0.100137	Up		0.044934	0.666082	0.447757	0.990861
ID_39776	ULK2	AT		0.0232294	-0.0614913	Down		0.044934	1.50132	1.00922	2.23335
ID_40180	RHOT1	ES		5.41858e-31	0.757419	Up		0.040623	1.51722	1.01795	2.26136
ID_40329	MMP28	AT		5.23119e-10	0.126839	Up		0.0359811	0.653387	0.438966	0.972546
ID_40482	MYO19	AA		3.42552e-10	-0.344498	Down		0.000721223	0.491566	0.325696	0.741911
ID_40651	PPP1R1B	AP		0.0130747	0.0291615	Up		0.027317	1.7046	1.06151	2.73731
ID_40677	ERBB2	AP		0.0141664	0.0449277	Up		0.0126855	1.65237	1.11326	2.45255
ID_40828	MED24	AP		6.15508e-07	0.304439	Up		0.0176712	0.616389	0.413281	0.919315
ID_40830	MED24	AP		6.15414e-07	-0.065478	Down		0.0176712	1.62235	1.08777	2.41966
ID_40842	MSL1	AT		8.29558e-13	-0.1417	Down		0.0291219	0.642184	0.431397	0.955963
ID_40843	MSL1	AT		8.29676e-13	0.166488	Up		0.0291219	1.55719	1.04607	2.31805
ID_40913	KRT15	RI		7.83949e-05	0.682598	Up		0.00117484	1.95775	1.30477	2.93754
ID_40930	JUP	AT		5.64877e-34	0.351837	Up		0.00589521	1.76565	1.17804	2.64637
ID_40931	JUP	AT		5.64811e-34	-1.2781	Down		0.00589521	0.566363	0.377876	0.848869
ID_41069	COASY	AA		7.09193e-17	1.30668	Up		0.0315879	0.648826	0.43735	0.962559
ID_41755	TMEM101	AD		8.86385e-11	-0.108867	Down		0.0401693	1.51215	1.01872	2.24458
ID_41941	ACBD4	AT		8.98187e-08	-0.118771	Down		0.0473508	0.665134	0.444517	0.995244
ID_4222	MOV10	AP		2.30956e-17	0.543594	Up		0.0297996	1.55985	1.0445	2.32947
ID_42231	CALCOCO2	ES		5.57205e-13	0.32199	Up		0.0093327	0.58777	0.393734	0.877428
ID_425	TNFRSF25	AA		3.73921e-15	0.207949	Up		0.0168284	0.614139	0.411777	0.915948
ID_42556	TOM1L1	ES		2.0136e-29	-0.425727	Down		0.0128011	0.608248	0.411219	0.899682
ID_42661	SUPT4H1	AP		0.0129101	-0.135718	Down		0.0394428	0.657868	0.441642	0.979958
ID_42921	CYB561	AP		9.10903e-10	0.332261	Up		0.0114532	1.69186	1.12552	2.54319
ID_42944	MAP3K3	ES		7.02639e-07	-0.15491	Down		0.0287795	0.643628	0.433607	0.955375
ID_43127	AMZ2	AP		6.78886e-11	-0.257697	Down		0.0110707	0.598448	0.402719	0.889305
ID_43128	AMZ2	AP		6.79012e-11	0.411824	Up		0.0110707	1.67099	1.12447	2.48312
ID_43493	GALK1	AT		1.24234e-12	0.448986	Up		0.0414602	1.51064	1.0161	2.24587
ID_43494	GALK1	AT		1.24433e-12	-0.151306	Down		0.041177	0.661594	0.445009	0.98359
ID_43705	SEC14L1	AP		9.63558e-10	0.256	Up		0.0414223	0.662878	0.44649	0.984136
ID_43795	AFMID	ES		8.85553e-22	-0.359583	Down		0.0024919	0.536432	0.35828	0.80317
ID_44293	CCDC57	AP		0.000603512	-0.0670043	Down		0.0339627	0.652525	0.439776	0.968194
ID_44468	ENOSF1	ES		0.000321892	-0.0519755	Down		0.00998663	0.594766	0.400567	0.883114
ID_44476	ENOSF1	AD		0.00903957	0.180294	Up		0.0218224	1.58823	1.06958	2.35837
ID_44491	MYL12A	ES		1.41966e-13	0.492435	Up		0.0098713	1.71016	1.13769	2.57068
ID_44507	TGIF1	AD		0.0192539	0.12142	Up		0.00262285	0.525078	0.345123	0.798864
ID_44508	TGIF1	AD		0.0154797	0.0727818	Up		0.0361392	0.652784	0.438034	0.972817
ID_44686	SLMO1	AP		0.000142579	0.274643	Up		0.0320012	1.57739	1.03998	2.39253
ID_44853	TTC39C	AT		2.05503e-16	-0.22535	Down		0.00452257	0.559501	0.374716	0.835409
ID_44854	TTC39C	AT		2.05305e-16	0.2014	Up		0.00452257	1.78731	1.19702	2.66869
ID_44966	SS18	ES		1.32569e-10	0.911876	Up		0.00297691	0.538654	0.358098	0.810247
ID_45313	PIK3C3	AP		1.28291e-06	-0.0469138	Down		0.00444921	1.77856	1.19607	2.64473
ID_45394	RNF165	AT		1.33412e-77	-0.497337	Down		0.0187045	1.60664	1.08212	2.38541
ID_45395	RNF165	AT		1.32957e-77	1.37131	Up		0.0187045	0.622415	0.419216	0.924109
ID_45835	ZNF236	ES		4.09378e-06	0.496251	Up		0.0417283	0.664383	0.448216	0.984804
ID_46429	CIRBP	AD		1.16345e-07	-0.262138	Down		0.0394222	1.51862	1.02045	2.26
ID_46626	ZNF554	ES		2.88591e-05	0.117322	Up		0.0101878	0.591089	0.395792	0.882753
ID_47757	ZNF69	AT		0.000767355	-0.238076	Down		0.0436971	1.50153	1.01156	2.22884
ID_47758	ZNF69	AT		0.000767354	0.0661399	Up		0.0436971	0.665987	0.448665	0.988574
ID_47760	ZNF700	AP		0.00869543	-0.0699087	Down		0.00271568	0.542432	0.36365	0.809108
ID_47761	ZNF700	AP		0.00869658	0.11436	Up		0.00271568	1.84355	1.23593	2.7499
ID_47813	ZNF791	ES		3.79555e-13	1.5098	Up		0.00704179	0.580289	0.39061	0.862075
ID_47878	MAST1	AT		1.05162e-32	1.85004	Up		0.000632409	2.14861	1.38565	3.33168
ID_47947	PODNL1	AP		2.86479e-32	1.00292	Up		0.0238933	0.615944	0.40451	0.937893
ID_47949	PODNL1	AP		1.4762e-31	-0.791083	Down		0.0231398	1.63643	1.06981	2.50317
ID_47967	CD97	ES		2.11311e-05	-0.131316	Down		0.00710705	0.579464	0.389475	0.862131
ID_48190	SMIM7	AD		0.000374058	0.128224	Up		0.045306	0.669071	0.451432	0.991636
ID_48231	MYO9B	AD		5.67969e-05	-0.116402	Down		0.0294591	1.60797	1.04855	2.46586
ID_485096	COL3A1	ES		0.029946	-0.0824145	Down		0.00827513	0.584024	0.391803	0.870549
ID_485124	COL3A1	ES		3.30781e-08	0.137195	Up		0.0318393	0.646624	0.434262	0.962834
ID_485138	COL3A1	ES		1.25492e-13	0.299912	Up		0.0019058	0.535877	0.361424	0.794534
ID_485163	COL3A1	ES		4.20304e-09	0.434389	Up		0.0166988	0.610859	0.407979	0.914627
ID_485166	COL3A1	ES		3.9245e-24	0.452407	Up		0.0174345	0.611701	0.407906	0.917315
ID_485176	COL3A1	ES		2.28461e-15	0.387861	Up		0.00237009	0.521545	0.34276	0.793585
ID_48655	YJEFN3	AT		3.58639e-09	-0.343739	Down		0.019819	1.64139	1.08183	2.49038
ID_48700	ZNF682	AP		2.3656e-09	-0.805334	Down		0.0182889	0.620998	0.418054	0.922461
ID_48715	ZNF90	AT		1.42079e-05	0.0970553	Up		0.0364364	0.655286	0.441012	0.973671
ID_48716	ZNF90	AT		1.4213e-05	-0.268127	Down		0.0364364	1.52605	1.02704	2.26751
ID_48720	ZNF737	AT		2.80773e-15	-0.0725206	Down		0.00608768	1.7515	1.17351	2.61416
ID_48721	ZNF737	AT		2.80783e-15	1.01843	Up		0.00608768	0.57094	0.382532	0.852145
ID_48815	ZNF91	AT		1.67435e-08	-0.174236	Down		0.0368111	1.52497	1.02618	2.26619
ID_48816	ZNF91	AT		1.67443e-08	0.187388	Up		0.0368111	0.655751	0.441269	0.974484
ID_48850	C19orf12	AP		0.0394144	0.0662258	Up		0.0425103	0.66653	0.450393	0.986389
ID_49203	DMKN	ES		3.21973e-08	-0.354256	Down		0.00382566	0.549234	0.365929	0.82436
ID_49390	ZNF260	ES		7.41743e-08	-0.212888	Down		0.00697831	0.575166	0.384846	0.859606
ID_49423	ZNF345	AP		0.00105783	-0.203443	Down		0.0102453	0.591272	0.395888	0.883087
ID_49449	ZNF585A	AT		0.0439022	-0.0805893	Down		0.00385622	1.81446	1.21129	2.71798
ID_50098	ARHGEF1	AP		4.11573e-15	-0.272838	Down		0.00641788	0.57391	0.384975	0.855571
ID_50099	ARHGEF1	AP		4.11565e-15	0.411137	Up		0.00641788	1.74243	1.16881	2.59757
ID_50645	MEIS3	AA		2.42511e-35	0.554063	Up		0.0467547	1.4967	1.00581	2.22719
ID_50714	CARD8	ES		1.04055e-11	0.346092	Up		0.0286895	0.642646	0.43245	0.95501
ID_51027	IRF3	AD		0.000418024	-0.0410707	Down		0.0119374	0.596478	0.398697	0.892373
ID_51398	ZNF614	ES		6.01347e-06	0.278082	Up		0.0147402	0.609166	0.409006	0.907281
ID_51458	ZNF528	ES		0.00630825	-0.180361	Down		0.037137	1.52207	1.02537	2.25938
ID_51474	ZNF83	AP		1.43513e-09	-0.200076	Down		0.0343313	0.648062	0.433648	0.96849
ID_51506	ZNF83	ES		8.26675e-12	-0.39007	Down		0.0250945	0.629212	0.419511	0.943736
ID_51649	ZNF160	AP		3.5223e-12	0.472357	Up		0.0165678	0.618423	0.417413	0.916232
ID_51650	ZNF160	AP		3.52217e-12	-0.0903639	Down		0.0165678	1.61702	1.09143	2.39571
ID_51718	ZNF765	AT		3.14655e-29	0.288274	Up		0.0458484	1.5166	1.00771	2.28249
ID_52207	ZNF264	AT		0.016918	-0.0702581	Down		0.0186485	1.60978	1.08268	2.3935
ID_52344	ZNF587B	AP		1.44417e-18	0.276684	Up		0.00458377	1.77035	1.19278	2.62759
ID_52345	ZNF587B	AP		1.44354e-18	-1.89816	Down		0.00667872	0.579624	0.390842	0.859591
ID_52379	ZNF606	AT		0.0129704	0.04382	Up		0.0192497	1.62319	1.08197	2.43515
ID_52695	GREB1	AP		4.11338e-12	-0.289961	Down		0.0276159	1.59689	1.05293	2.42187
ID_52931	CGREF1	AP		5.42192e-05	-0.134963	Down		0.0257655	1.58531	1.05733	2.37694
ID_53027	ZNF512	ES		0.0104082	0.0774805	Up		0.047274	0.672394	0.454279	0.995235
ID_53926	ZNF638	AP		0.00137233	0.487039	Up		0.0185118	0.62229	0.419332	0.92348
ID_53927	ZNF638	AP		0.00137199	-0.0474546	Down		0.0211333	1.5915	1.07214	2.36245
ID_544	RERE	AP		2.63027e-38	0.726293	Up		0.0175092	1.62301	1.08847	2.42006
ID_54686	MRPL30	AT		1.78305e-10	0.685119	Up		0.0377576	0.650827	0.433993	0.975997
ID_54687	MRPL30	AT		5.953e-12	-0.0983328	Down		0.0406555	1.52364	1.01807	2.28028
ID_55198	BIN1	ES		0.0174059	-0.525644	Down		0.0259297	1.57684	1.05618	2.35417
ID_55200	BIN1	ES		4.50933e-10	-0.186859	Down		0.0134219	1.6917	1.11512	2.5664
ID_55686	DAPL1	AT		1.57863e-14	0.583604	Up		8.07036e-06	2.7378	1.75925	4.26067
ID_55687	DAPL1	AT		1.58005e-14	-0.499274	Down		0.000758695	0.498768	0.33271	0.747708
ID_56454	PDE1A	AT		2.80072e-09	0.267581	Up		0.0406233	1.52033	1.01804	2.27044
ID_56455	PDE1A	AT		3.48577e-09	-0.0831533	Down		0.0233106	0.627233	0.419174	0.938563
ID_56787	CFLAR	AP		8.83877e-09	0.219457	Up		0.0197391	0.620847	0.415854	0.92689
ID_57462	PNKD	AT		4.33109e-90	-0.307257	Down		0.0235692	1.57563	1.06297	2.33553
ID_57463	PNKD	AT		4.33303e-90	1.45622	Up		0.0235692	0.634668	0.428169	0.940757
ID_57871	SP140	AT		2.25468e-07	-0.31676	Down		0.00157982	1.90813	1.27803	2.84888
ID_57896	SP100	AT		1.4599e-06	-0.0837596	Down		0.00413446	0.557107	0.373507	0.830958
ID_58054	UGT1A1	AT		3.58277e-15	-0.782793	Down		0.0487473	1.50109	1.00223	2.24825
ID_58108	COL6A3	ES		2.61835e-32	0.949978	Up		0.0381931	0.649712	0.432151	0.976804
ID_58109	COL6A3	ES		2.48558e-235	4.05216	Up		0.013431	0.602032	0.402621	0.900207
ID_58148	RAMP1	AP		5.8495e-10	1.0937	Up		0.00182949	1.93732	1.27816	2.93641
ID_58149	RAMP1	AP		1.25747e-10	-0.0991657	Down		0.00795408	0.577197	0.384649	0.866132
ID_58600	CDC25B	AP		2.3453e-15	0.180966	Up		0.0350268	0.651978	0.438042	0.970399
ID_58601	CDC25B	AP		2.34556e-15	-0.917783	Down		0.0350268	1.53379	1.0305	2.28289
ID_59255	PHF20	ES		9.88184e-13	0.424619	Up		0.009184	0.58556	0.391474	0.875868
ID_59268	EPB41L1	AP		0.0053952	-0.141492	Down		0.0279185	0.639568	0.429367	0.952674
ID_60539	HLCS	ES		0.0290834	-0.0954551	Down		0.00164244	0.525964	0.352563	0.78465
ID_60587	ERG	AP		1.55209e-38	1.74563	Up		0.0303435	0.63532	0.421396	0.957844
ID_60821	TRPM2	ES		2.99455e-14	-0.248459	Down		0.000532345	0.476432	0.313189	0.724761
ID_60878	SLC19A1	AP		4.22187e-24	0.502523	Up		0.00788631	1.71752	1.15244	2.55969
ID_61334	DERL3	RI		4.90793e-38	0.692093	Up		8.60209e-05	2.23915	1.49746	3.3482
ID_61346	SLC2A11	ES		0.000122259	-0.418822	Down		0.0251316	1.57029	1.05792	2.33082
ID_61347	SLC2A11	ES		9.1712e-13	-0.649273	Down		0.0481261	1.49311	1.00331	2.22203
ID_62132	SH3BP1	AT		0.0394147	-0.0477831	Down		0.00149435	1.9218	1.28415	2.87609
ID_62134	SH3BP1	AT		0.0394126	0.0885306	Up		0.00149435	0.520345	0.347694	0.778727
ID_62406	XPNPEP3	ES		1.23377e-05	-0.291446	Down		0.0258911	0.634921	0.425755	0.946845
ID_62627	ARHGAP8	ES		3.63454e-25	0.708704	Up		0.0440139	1.50081	1.01094	2.22804
ID_62645	KIAA0930	AP		1.07951e-15	-0.700738	Down		0.0157454	0.612066	0.410915	0.911686
ID_62646	KIAA0930	AP		1.10122e-14	0.22815	Up		0.0305876	1.54732	1.04171	2.29834
ID_62665	FBLN1	AT		6.39885e-45	0.374844	Up		0.0164852	0.615969	0.414531	0.915292
ID_62846	SCO2	AP		6.65425e-19	-0.184826	Down		0.0216491	1.59713	1.07102	2.38168
ID_62847	SCO2	AP		9.01548e-18	0.665897	Up		0.0180526	0.619715	0.416812	0.921391
ID_62908	ACR	AT		0.00942256	-0.476987	Down		0.035939	1.52497	1.02808	2.26202
ID_63061	SSUH2	AP		2.30624e-36	-0.431952	Down		0.0290997	0.645488	0.435645	0.95641
ID_63081	THUMPD3	AD		0.00254471	-0.146794	Down		0.0280975	0.644552	0.435524	0.953903
ID_63187	ARPC4	AD		1.02178e-18	0.749603	Up		0.0204967	1.60534	1.07569	2.39579
ID_63709	UBE2E2	AP		8.69447e-07	-0.279672	Down		0.00116924	1.9921	1.31401	3.0201
ID_63710	UBE2E2	AP		8.69107e-07	0.206538	Up		0.00116924	0.501983	0.331115	0.761027
ID_63746	TOP2B	AP		0.0162389	0.032715	Up		0.0249715	1.57077	1.05842	2.33113
ID_63747	TOP2B	AP		0.0162383	-0.313744	Down		0.0249715	0.636631	0.428977	0.944804
ID_64443	CCR2	AT		5.31367e-06	0.096291	Up		0.00304368	0.547508	0.367585	0.815498
ID_64444	CCR2	AT		5.31477e-06	-0.158843	Down		0.00304368	1.82646	1.22624	2.72046
ID_64544	DHX30	ES		1.70407e-18	0.3631	Up		0.0174108	0.620762	0.419031	0.91961
ID_64759	IP6K2	AD		1.4627e-15	0.538338	Up		0.0297734	1.54764	1.04376	2.29477
ID_64837	USP19	ES		1.70027e-05	0.20786	Up		0.00244728	0.545403	0.368469	0.8073
ID_65237	PBRM1	ES		2.5711e-26	0.398845	Up		0.0173019	1.62551	1.08957	2.42508
ID_65594	FOXP1	AP		1.22006e-19	0.955694	Up		0.00259808	0.54181	0.363612	0.80734
ID_65598	FOXP1	AP		6.13491e-12	-0.329476	Down		0.0330347	1.53576	1.03516	2.27844
ID_65667	CGGBP1	RI		0.000130318	0.215827	Up		0.0393408	0.659121	0.443376	0.979847
ID_65828	TMEM45A	ES		1.17712e-29	1.70711	Up		0.0192413	0.620034	0.415533	0.925178
ID_66014	CD47	ES		0.000165447	0.122508	Up		0.029381	0.639075	0.427166	0.956108
ID_66044	PVRL3	AT		2.32789e-08	-0.484301	Down		0.00365109	1.80445	1.212	2.68651
ID_66045	PVRL3	AT		2.32704e-08	0.172476	Up		0.00365109	0.554186	0.37223	0.825085
ID_66353	MAATS1	AT		0.0274442	-0.0251965	Down		0.0119641	1.66363	1.11857	2.47431
ID_66354	MAATS1	AT		0.0274463	0.320235	Up		0.0119641	0.601093	0.404153	0.894001
ID_66549	ZNF148	ES		3.58694e-10	0.4621	Up		0.00639526	0.573777	0.384887	0.855369
ID_66789	NEK11	ES		1.13754e-13	0.288214	Up		0.0493261	1.5292	1.00125	2.33552
ID_66939	SLC35G2	AD		2.33057e-13	0.31567	Up		0.00810081	0.586569	0.395208	0.870587
ID_67108	GK5	ES		3.63449e-10	-0.322088	Down		0.00493364	0.562985	0.377183	0.840314
ID_67287	EIF2A	ES		4.8376e-07	0.419693	Up		0.000663288	0.48516	0.319919	0.735749
ID_67496	B3GALNT1	AP		0.0498882	-0.0362427	Down		0.0460332	1.49578	1.00711	2.22156
ID_68090	TPRG1	AP		7.15926e-19	-1.15713	Down		0.00188643	1.90978	1.26988	2.87211
ID_68091	TPRG1	AP		7.15979e-19	0.785293	Up		0.00175888	0.521406	0.346715	0.784114
ID_68405	PCGF3	RI		0.0291423	-0.114194	Down		0.00505067	0.561324	0.37489	0.840473
ID_68406	PCGF3	AA		4.53186e-10	-0.438473	Down		0.015744	0.611298	0.409983	0.911466
ID_68591	SH3BP2	AP		2.08009e-05	-0.44921	Down		0.0151611	1.64046	1.10021	2.44599
ID_68594	SH3BP2	AP		4.34657e-43	1.57056	Up		0.0131381	0.606115	0.408044	0.900333
ID_68809	CC2D2A	ES		0.0492017	-0.114162	Down		0.0100489	1.68895	1.1332	2.51724
ID_68882	PACRGL	ES		0.0160503	0.206926	Up		0.026374	1.58319	1.05542	2.37489
ID_68957	SEPSECS	ES		0.0480056	0.0528772	Up		0.0331923	0.652049	0.439912	0.966483
ID_69133	TMEM33	RI		2.0164e-07	0.0851655	Up		0.0153327	1.66808	1.10299	2.52269
ID_69601	FAM47E	AT		1.59867e-08	-0.125954	Down		0.0194128	1.61314	1.08029	2.40881
ID_69602	FAM47E	AT		1.59876e-08	0.340222	Up		0.0194128	0.619909	0.415143	0.925673
ID_69612	CCDC158	AT		2.55263e-27	-0.211043	Down		0.0162251	1.71058	1.1042	2.64996
ID_69813	ARHGAP24	AP		9.29098e-32	0.845293	Up		0.046301	1.50116	1.00668	2.23852
ID_69814	ARHGAP24	AP		2.0074e-32	-0.576276	Down		0.0134215	0.607203	0.408859	0.901767
ID_70396	ANK2	ES		2.98396e-05	-0.152225	Down		0.0171647	0.619814	0.418227	0.918566
ID_70465	PDE5A	AP		0.000917739	0.164358	Up		0.0249897	0.630782	0.421599	0.943756
ID_70537	INTU	AA		4.48469e-15	-0.198296	Down		0.0206402	0.625501	0.420407	0.930649
ID_70575	PGRMC2	AP		2.6074e-08	-0.636784	Down		0.0102978	1.69176	1.13215	2.52796
ID_70810	LRBA	AP		0.00014768	-0.400374	Down		0.00364375	0.553596	0.3716	0.824728
ID_71448	ZDHHC11	AT		0.0139843	0.141133	Up		0.0367222	1.5303	1.0266	2.28115
ID_71449	ZDHHC11	AT		0.0307697	0.0794838	Up		0.0280771	0.643248	0.433879	0.953647
ID_71510	C5orf38	ES		1.15482e-05	0.505328	Up		0.0358904	1.53377	1.02857	2.28708
ID_71889	FBXO4	ES		0.0020558	0.0913182	Up		0.0132645	0.605152	0.406662	0.900526
ID_71950	C5orf28	AP		0.000689015	0.149337	Up		0.0278826	0.637345	0.426588	0.952227
ID_71951	C5orf28	AP		0.000689118	-0.0879533	Down		0.0278826	1.56901	1.05017	2.34418
ID_72277	MAST4	AP		1.98465e-11	-0.494732	Down		0.0228807	1.58502	1.06594	2.35687
ID_72281	MAST4	AT		9.22532e-19	-0.0945224	Down		0.0205008	1.60659	1.0758	2.39925
ID_72546	SV2C	AT		8.85155e-15	0.578825	Up		0.0213213	0.617439	0.409563	0.930823
ID_72547	SV2C	AT		8.85145e-15	-0.340661	Down		0.0117226	1.70818	1.12643	2.59036
ID_72735	TMEM161B	RI		0.0122937	-0.167092	Down		0.0204433	0.624416	0.419321	0.929824
ID_72944	SLC25A46	AP		3.65412e-07	0.122205	Up		0.0225147	1.58039	1.06664	2.3416
ID_73017	TRIM36	AP		3.26361e-25	-0.957081	Down		0.00495407	0.566817	0.381478	0.8422
ID_73018	TRIM36	AP		3.26361e-25	0.627751	Up		0.0260263	1.78464	1.07163	2.97203
ID_7314	GPR89A	ES		6.73147e-17	-0.128011	Down		0.00912977	0.589123	0.395781	0.876913
ID_73334	VDAC1	AP		0.00304527	-0.0287469	Down		0.0366353	1.54461	1.02738	2.32222
ID_73335	VDAC1	AP		0.00304544	0.282619	Up		0.0468896	0.66303	0.4421	0.994364
ID_73412	SAR1B	AP		8.9853e-05	-0.200421	Down		0.00343623	0.551937	0.370665	0.82186
ID_73415	SAR1B	AP		3.01207e-08	0.222609	Up		0.0462472	1.49322	1.00669	2.21487
ID_73765	PCDHA1	AT		5.09831e-11	1.32405	Up		8.06043e-06	2.57506	1.69985	3.9009
ID_73766	PCDHA1	AT		5.09744e-11	-0.0873399	Down		8.06043e-06	0.38834	0.256351	0.588288
ID_73769	PCDHA2	AT		4.20422e-05	0.505229	Up		0.019546	1.59616	1.07799	2.3634
ID_73770	PCDHA2	AT		2.67574e-08	-0.122329	Down		0.00161034	0.527294	0.354268	0.784827
ID_73778	PCDHA5	RI		1.97556e-13	-0.312422	Down		0.0027762	0.546094	0.367392	0.811717
ID_73784	PCDHA9	AT		2.20643e-16	-0.231535	Down		0.0359968	0.656646	0.443197	0.972895
ID_73785	PCDHA9	AT		2.20605e-16	0.894571	Up		0.0359968	1.52289	1.02786	2.25633
ID_73829	PCDH1	AP		0.0172366	-0.0556346	Down		0.0391136	0.64813	0.42927	0.978576
ID_74053	TIGD6	AD		0.0132605	0.0562075	Up		0.0481726	1.50145	1.00327	2.247
ID_74883	ZFP2	ME		6.44745e-09	-0.466168	Down		0.0406706	1.52282	1.01802	2.27792
ID_7562	SEMA6C	AD		2.3652e-25	0.704437	Up		0.0486799	0.66938	0.449112	0.997677
ID_75775	HMGA1	ES		0.00190161	-0.0752888	Down		0.0200476	0.6234	0.418591	0.928418
ID_7640	TUFT1	ES		8.88799e-09	-0.242636	Down		0.0276031	1.58088	1.0518	2.37609
ID_76410	CLIC5	AT		3.41824e-13	-0.183355	Down		0.0382134	1.51891	1.02297	2.2553
ID_76411	CLIC5	AT		3.41806e-13	0.898822	Up		0.0382134	0.658366	0.443401	0.977548
ID_76429	GPR116	ES		1.37634e-47	0.645383	Up		0.0406166	1.51929	1.01803	2.26736
ID_7677	THEM4	ES		5.66196e-11	-0.116443	Down		0.0154562	0.609377	0.408107	0.909911
ID_77106	HACE1	ES		1.92087e-09	0.460823	Up		0.0171343	0.617933	0.415963	0.91797
ID_77377	PKIB	AP		5.42516e-06	0.328351	Up		0.00596695	0.569948	0.381759	0.850904
ID_77899	AHI1	ES		0.000270141	0.156277	Up		0.00133486	0.514751	0.343095	0.772288
ID_77987	PHACTR2	ES		3.87117e-23	1.03737	Up		0.0269933	0.641558	0.432918	0.95075
ID_78126	RAET1E	AT		6.57043e-05	0.10801	Up		0.0154195	0.613003	0.412569	0.910811
ID_78127	RAET1E	AT		9.82746e-05	-0.321036	Down		0.0277609	1.56387	1.05012	2.32895
ID_78407	QKI	RI		5.50407e-08	0.372474	Up		0.0335667	0.649221	0.435888	0.966964
ID_78474	WDR27	ES		5.89397e-28	0.453661	Up		0.0464255	1.50021	1.00644	2.23623
ID_78491	FAM120B	AP		0.000165223	-0.389454	Down		0.0113228	0.596714	0.400158	0.889818
ID_78492	FAM120B	AP		0.000138135	0.0586961	Up		0.00420451	1.79841	1.20326	2.68794
ID_79025	OSBPL3	AD		0.00240003	-0.20519	Down		0.016877	0.6158	0.413734	0.916555
ID_79595	ADCY1	AT		4.15482e-11	-0.226282	Down		0.00605715	1.74387	1.17233	2.59406
ID_79596	ADCY1	AT		4.15532e-11	0.397112	Up		0.00605715	0.573436	0.385496	0.853003
ID_7961	MUC1	ES		1.95478e-06	-0.138887	Down		0.0227661	0.634642	0.429119	0.938599
ID_79842	ZNF273	AT		6.6984e-13	0.237384	Up		0.00856641	0.586079	0.393511	0.872883
ID_79843	ZNF273	AT		6.69688e-13	-0.166871	Down		0.00856641	1.70625	1.14563	2.54123
ID_80157	STYXL1	AD		0.0230482	0.25904	Up		0.0297861	0.64318	0.431965	0.957669
ID_8088	ASH1L	ES		4.18668e-08	0.38101	Up		0.0120366	0.60228	0.405438	0.89469
ID_81336	HBP1	AD		3.37353e-05	0.255907	Up		0.0145292	0.599248	0.397422	0.90357
ID_81742	AHCYL2	AP		1.28236e-09	-0.386316	Down		0.0217626	1.59361	1.0703	2.37279
ID_81744	AHCYL2	AP		5.99967e-10	0.514868	Up		0.00562736	0.573979	0.387455	0.850298
ID_8178	LMNA	AT		6.41306e-13	-0.210102	Down		0.017958	1.63567	1.0882	2.45857
ID_8179	LMNA	AT		6.41199e-13	0.359067	Up		0.0170028	0.608805	0.405029	0.915101
ID_81803	MEST	AP		1.65738e-35	0.890953	Up		0.0203572	1.61153	1.07681	2.41179
ID_81804	MEST	AP		1.04547e-35	-1.35663	Down		0.0331424	0.647851	0.434539	0.965876
ID_81960	C7orf55-LUC7L2	ES		1.03785e-06	-0.637497	Down		0.0270498	0.640395	0.431376	0.950692
ID_81964	TBXAS1	AP		1.83573e-14	-0.309537	Down		0.0330187	1.53764	1.0353	2.28373
ID_81965	TBXAS1	AP		1.83581e-14	0.809612	Up		0.0330187	0.650347	0.437881	0.965904
ID_81971	TBXAS1	ES		0.0177213	0.212599	Up		0.0448666	0.6675	0.4497	0.990785
ID_82169	ZNF398	AP		0.00139962	0.202935	Up		0.0116237	0.602864	0.406921	0.893159
ID_82171	ZNF398	AP		0.00722937	-0.138755	Down		0.0418471	1.54066	1.01607	2.33609
ID_823	NECAP2	ES		0.000157815	-0.157956	Down		0.0135482	1.65839	1.10993	2.47788
ID_82544	ZNF596	AD		1.2948e-07	0.187542	Up		0.0288627	0.632374	0.419252	0.953834
ID_82842	PCM1	ES		1.37223e-05	0.145464	Up		0.0219006	0.629236	0.423427	0.935079
ID_830	NBPF1	AP		0.000528748	0.12925	Up		0.0157668	0.609993	0.408363	0.911179
ID_831	NBPF1	AP		0.000528878	-0.18421	Down		0.0157668	1.63936	1.09748	2.4488
ID_83312	NRG1	AT		2.40975e-11	0.709618	Up		0.0307726	1.57542	1.04299	2.37963
ID_83427	FGFR1	ES		9.22919e-20	1.12581	Up		0.0270223	0.640756	0.431866	0.950686
ID_83519	GINS4	RI		3.14933e-11	-1.10692	Down		0.0295635	0.639232	0.427171	0.956565
ID_83800	EFCAB1	AT		0.00161455	0.169632	Up		0.00154677	1.98793	1.29914	3.04191
ID_83976	ASPH	ES		2.59099e-05	0.653294	Up		0.00826606	1.71352	1.14898	2.55543
ID_84064	COPS5	ES		1.20911e-08	-0.741451	Down		0.0203299	0.623357	0.41816	0.929245
ID_84538	TMEM67	ES		5.47254e-11	0.562378	Up		0.003955	0.558448	0.375749	0.829982
ID_84569	ESRP1	AD		1.42037e-24	-0.17487	Down		0.0324051	0.649632	0.437567	0.964472
ID_84675	COX6C	AP		3.97852e-43	1.15833	Up		0.023277	0.627271	0.419262	0.938479
ID_84774	RRM2B	ES		1.49358e-09	0.401531	Up		0.00111465	0.511192	0.341486	0.765236
ID_84859	ANGPT1	AP		9.03766e-30	0.632809	Up		0.0282405	0.640114	0.42971	0.95354
ID_84860	ANGPT1	AP		9.03726e-30	-0.622743	Down		0.0317806	1.54787	1.03882	2.30635
ID_84918	SYBU	ES		0.0190656	0.0605802	Up		0.0307253	0.644119	0.432188	0.959974
ID_85000	ENPP2	AP		3.37198e-08	-0.53691	Down		0.0250919	0.632458	0.423581	0.944337
ID_85002	ENPP2	AP		5.07628e-08	0.101962	Up		0.0491785	1.49527	1.00145	2.2326
ID_85260	ST3GAL1	RI		2.62323e-24	-0.274313	Down		0.0457521	0.669438	0.451556	0.992453
ID_85605	VPS28	RI		5.37698e-06	-0.202646	Down		0.0439923	0.66676	0.449444	0.989152
ID_85606	VPS28	RI		3.12028e-07	-0.227241	Down		0.0300637	0.645492	0.434633	0.958646
ID_85620	CYHR1	AD		1.73084e-05	-0.130908	Down		0.0460573	0.668714	0.450337	0.992984
ID_86085	APTX	ES		4.19808e-06	-0.110748	Down		0.0490123	1.49908	1.00175	2.24331
ID_86743	GOLM1	AP		8.73498e-22	0.596142	Up		0.00115553	0.498672	0.327761	0.758705
ID_86745	GOLM1	AP		8.73411e-22	-0.341181	Down		0.00115553	2.00533	1.31804	3.051
ID_86786	NXNL2	AT		0.0388524	-0.0917407	Down		0.0282799	1.5687	1.04908	2.34569
ID_86787	NXNL2	AT		0.0388553	0.155375	Up		0.0282799	0.63747	0.426313	0.953215
ID_86790	S1PR3	AP		0.0176088	0.11907	Up		0.0140816	0.597438	0.396012	0.901318
ID_86791	S1PR3	AP		0.0176091	-0.156637	Down		0.0140816	1.67381	1.10949	2.52518
ID_86897	SUSD3	AP		0.00446411	-0.225551	Down		0.00212498	1.87575	1.25573	2.80191
ID_87175	AKAP2	AP		8.24923e-18	0.491655	Up		0.00593873	0.569455	0.38128	0.8505
ID_87334	TNC	ES		6.61843e-07	-0.389638	Down		0.0397692	1.52057	1.0198	2.26726
ID_87336	TNC	ES		5.62018e-11	0.180245	Up		0.0297307	1.56286	1.04488	2.33763
ID_87342	TNC	ES		0.0260278	0.101508	Up		0.0113212	1.68345	1.12499	2.51915
ID_87493	RABGAP1	AP		0.00577203	-0.0596395	Down		0.0154619	0.607582	0.405925	0.909419
ID_87494	RABGAP1	AP		9.89459e-05	0.691005	Up		0.0450585	0.669366	0.45203	0.991197
ID_87643	C9orf117	AT		7.82234e-05	-0.143088	Down		0.00953176	1.75985	1.14785	2.69817
ID_88047	ADAMTS13	AP		6.5471e-07	0.32495	Up		0.000779117	0.509377	0.34368	0.75496
ID_88252	ABCA2	RI		1.75622e-50	1.26325	Up		0.0366517	0.649219	0.432936	0.973552
ID_88255	ABCA2	AA		3.7252e-25	0.737034	Up		0.0306387	0.64826	0.437591	0.960349
ID_88592	RAI2	AP		2.32812e-28	-0.150816	Down		0.00394758	1.79828	1.20658	2.68014
ID_88593	RAI2	AP		2.32744e-28	0.729595	Up		0.00394758	0.556088	0.373115	0.82879
ID_88652	CXorf23	AD		2.26016e-07	0.259613	Up		0.0268815	0.640183	0.431294	0.950243
ID_88808	RPGR	ES		3.6504e-05	-0.0552093	Down		0.0247558	0.624687	0.41427	0.941978
ID_89138	SHROOM4	AP		3.67825e-07	0.604978	Up		0.00526767	0.563943	0.37713	0.843295
ID_89247	MAGED2	AP		1.229e-09	-0.173223	Down		0.0172077	0.615583	0.412976	0.917591
ID_89297	SPIN2A	AP		1.53928e-17	0.395798	Up		0.00779787	0.581066	0.389534	0.866773
ID_89298	SPIN2A	AP		1.53933e-17	-1.08327	Down		0.00779787	1.72097	1.1537	2.56717
ID_89581	PCDH11X	AT		1.27262e-16	0.146309	Up		0.0495472	1.48732	1.00079	2.21037
ID_89594	DIAPH2	AT		1.34561e-24	-0.341205	Down		0.0115412	1.66575	1.12112	2.47498
ID_89595	DIAPH2	AT		1.34579e-24	0.503903	Up		0.0115412	0.600329	0.404044	0.891968
ID_89858	COL4A6	AT		2.44065e-44	-0.426226	Down		0.044275	0.666431	0.44877	0.989661
ID_89859	COL4A6	AT		2.43662e-44	1.75984	Up		0.044275	1.50053	1.01045	2.22831
ID_89976	2021-09-06	AA		4.11252e-20	0.818151	Up		0.00900634	0.58531	0.391586	0.874873
ID_90029	STAG2	AP		7.57522e-21	0.27872	Up		0.00537708	0.567477	0.380799	0.845669
ID_90030	STAG2	AP		4.88465e-13	-0.49779	Down		0.00158571	1.91497	1.27959	2.86585
ID_90295	CXorf40A	AP		2.42224e-12	0.408435	Up		0.0259143	0.63247	0.422645	0.946464
ID_90298	CXorf40A	AP		2.42101e-12	-0.224998	Down		0.0259143	1.5811	1.05656	2.36605
ID_90323	TMEM185A	ES		0.00208386	-0.134498	Down		0.012559	0.608183	0.411577	0.898705
ID_9253	TROVE2	AT		1.07262e-06	-0.158957	Down		0.0161807	1.62574	1.09406	2.41579
ID_9255	TROVE2	AT		1.07263e-06	0.163268	Up		0.0161807	0.615106	0.413943	0.914027
ID_92712	CTTN	ES		8.61834e-18	-0.326557	Down		0.00113088	0.517098	0.347652	0.769133
ID_93836	TSC2	ES		7.79775e-51	0.7497	Up		0.0142467	0.611362	0.412486	0.906125
ID_9389	NAV1	AP		1.89718e-71	2.43368	Up		0.0055257	0.566448	0.379139	0.846295
ID_94074	NPIPB5	RI		0.0318506	0.066434	Up		0.0287052	0.640553	0.429767	0.954724
ID_95017	MRI1	ES		0.000545559	0.073141	Up		0.010268	1.83896	1.15489	2.92823
ID_95454	IFT172	ES		0.000339106	-0.0452429	Down		0.0245785	0.63583	0.428427	0.943637
ID_9662	CD46	ES		0.000342109	0.322934	Up		0.0427537	0.659075	0.440333	0.986482
ID_9689	HHAT	AP		4.45196e-14	0.384073	Up		0.0452903	0.666909	0.448562	0.99154
ID_97992	MRPS28	ES		0.000656452	-0.0927846	Down		0.0204881	0.627941	0.423642	0.930764

## Sheet: Table S7
Table S7. Statistical information of the ROC curve for each prognostic model.
Type	Sensitivity(TRP)	Specificity(TNR)	AUC
AA	0.904	0.32	0.638
AD	0.771	0.67	0.773
AP	0.633	0.82	0.765
AT	0.921	0.689	0.856
ES	0.715	0.876	0.827
ME	0.752	0.382	0.555
RI	0.838	0.564	0.719
ALL	1.00	0.702	0.939

## Sheet: Table S8
Table S8. The association of IGAS prognostic model and clinicopathological characteristics with OS and RFS.
	Univariate analysis					Multivariate analysis
	Pvalues	HR	Low 95%CI	High 95%CI		Pvalues	HR	Low 95%CI	High 95%CI
OS
T	0.176	1.18	0.928014	1.5037		0.063879	0.59	0.335738	1.03108
N	1.63075e-06	1.7	1.36942	2.11521		0.68615	1.12	0.637304	1.98281
M	0.006827	2.59	1.29997	5.16713		0.899102	1.09	0.303363	3.88777
Stage	0.0003249	1.79	1.3038	2.46318		0.0382604	2.55	1.05202	6.19805
Positive lymph nodes	1.37308e-05	1.07	1.03635	1.09889		0.765544	0.99	0.93795	1.04827
ER status	0.29031	0.78	0.485749	1.24107		0.019201	0.52	0.303136	0.899519
Risk group	2.40517e-17	13.22	7.27424	24.0168		7.0865e-12	15.2	6.98189	33.0902
RFS
T	6.18025e-06	1.62	1.31435	1.99745		0.776517	1.07	0.666155	1.72259
N	1.99755e-08	1.66	1.39057	1.98099		0.122196	1.47	0.902478	2.38251
M	9.65029e-16	8.9	5.21846	15.1644		0.0250119	3.38	1.16504	9.79419
Stage	3.93717e-08	2.18	1.65147	2.88106		0.834015	1.08	0.516577	2.26752
Positive lymph nodes	9.84768e-08	1.07	1.04316	1.09573		0.91062	1	0.946332	1.06382
ER status	0.107521	0.7	0.454246	1.08058		0.0466706	0.6	0.363466	0.992516
Risk group	1.73692e-06	2.39	1.67164	3.41285		0.000928597	2.25	1.39225	3.63586

## Sheet: Table S9
Table S9. Significant enrichment of KEGG pathways of the SF-associated IGAS genesets.
SF	ID	Description	Pvalues	Gene Symbol
EGFR	hsa05100	Bacterial invasion of epithelial cells	0.000872859	PTK2,CTTN
	hsa05205	Proteoglycans in cancer	0.00604223	PTK2,CTTN
	hsa05170	Human immunodeficiency virus 1 infection	0.00645167	AP1B1,PTK2
	hsa04810	Regulation of actin cytoskeleton	0.0068127	GSN,PTK2
	hsa05163	Human cytomegalovirus infection	0.00724559	TSC2,PTK2
	hsa05131	Shigellosis	0.0086873	PTK2,CTTN
	hsa05165	Human papillomavirus infection	0.0152911	TSC2,PTK2
	hsa04151	PI3K-Akt signaling pathway	0.0173924	TSC2,PTK2
	hsa04370	VEGF signaling pathway	0.0358451	PTK2
	hsa04115	p53 signaling pathway	0.0441979	TSC2
RBM5	hsa05168	Herpes simplex virus 1 infection	0.00327161	IRF3,ZNF83,SRSF1,ZNF765,ZFP30,ZNF226
	hsa05340	Primary immunodeficiency	0.0059881	UNG,RFX5
SRSF5	hsa01240	Biosynthesis of cofactors	0.0157919	AFMID,PPCS,AK9
	hsa05168	Herpes simplex virus 1 infection	0.025356	IRF3,ZNF765,ZFP30,SRSF1,ZNF614
	hsa05203	Viral carcinogenesis	0.0323374	IRF3,GSN,CCND3

## Sheet: Table S10
Table S10. The correlation of the immune cells with each IGAS prognosis signature.
Cell	Gene	Correlation	Pvalues	Type
aDC	AKR1C2	0.0128431	0.697562	Not
aDC	ANK3	-0.111648	0.000702078	Negative
aDC	ARRB2	0.446004	4.50018e-46	Positive
aDC	ATP5A1	-0.0376343	0.254656	Not
aDC	BIN1	0.282857	2.38312e-18	Positive
aDC	CC2D2A	-0.263027	5.42693e-16	Negative
aDC	CLIC5	0.0165195	0.617169	Not
aDC	COL3A1	-0.0480871	0.145441	Not
aDC	CREM	0.194534	2.79971e-09	Positive
aDC	CYLD	0.269221	1.0446e-16	Positive
aDC	DAPL1	-0.010035	0.761403	Not
aDC	DMKN	0.0173872	0.598799	Not
aDC	ECHDC2	-0.313936	1.91342e-22	Negative
aDC	ENOSF1	-0.265007	3.21971e-16	Negative
aDC	ENPP2	0.172565	1.43383e-07	Positive
aDC	FOPNL	-0.180783	3.47782e-08	Negative
aDC	GPR116	0.026624	0.420409	Not
aDC	KHNYN	-0.168854	2.66041e-07	Negative
aDC	MAATS1	-0.217447	2.75334e-11	Negative
aDC	MAGED2	-0.289027	4.01428e-19	Negative
aDC	MAP3K3	0.0618621	0.0609898	Not
aDC	MRPL30	-0.0760214	0.021249	Negative
aDC	NR1H3	0.339936	2.88925e-26	Positive
aDC	PACRGL	-0.225178	5.12371e-12	Negative
aDC	PCDHA2	-0.136657	3.262e-05	Negative
aDC	PKIB	-0.185031	1.6294e-08	Negative
aDC	PODNL1	-0.0594171	0.0719574	Not
aDC	PRKCDBP	0.113002	0.000603297	Positive
aDC	RAET1E	-0.0199078	0.546899	Not
aDC	RNF165	-0.0732531	0.0264582	Negative
aDC	SH3BP1	0.486164	1.24971e-55	Positive
aDC	SH3BP2	0.11911	0.000298247	Positive
aDC	SH3D21	-0.272546	4.23764e-17	Negative
aDC	TMEM101	-0.243794	6.89596e-14	Negative
aDC	TMEM185A	-0.201157	7.77729e-10	Negative
aDC	TNC	0.0324656	0.325815	Not
aDC	TOM1L1	-0.184889	1.67171e-08	Negative
aDC	TPSAB1	-0.0251534	0.446542	Not
aDC	TRPM2	0.25312	6.92401e-15	Positive
aDC	TTC39C	-0.162338	7.62508e-07	Negative
aDC	UGT1A1	-0.0487786	0.139733	Not
aDC	ZNF273	-0.0714756	0.0303552	Negative
B cells	AKR1C2	0.0319299	0.333865	Not
B cells	ANK3	-0.0426897	0.196266	Not
B cells	ARRB2	0.410209	1.43593e-38	Positive
B cells	ATP5A1	-0.098841	0.00271758	Negative
B cells	BIN1	0.311073	4.78853e-22	Positive
B cells	CC2D2A	-0.198378	1.33839e-09	Negative
B cells	CLIC5	0.0781312	0.0179012	Positive
B cells	COL3A1	0.025293	0.444022	Not
B cells	CREM	0.127971	0.000101053	Positive
B cells	CYLD	0.2437	7.05538e-14	Positive
B cells	DAPL1	-0.0284239	0.389677	Not
B cells	DMKN	0.00238257	0.94253	Not
B cells	ECHDC2	-0.13874	2.4616e-05	Negative
B cells	ENOSF1	-0.193456	3.43446e-09	Negative
B cells	ENPP2	0.259553	1.3419e-15	Positive
B cells	FOPNL	-0.228733	2.31584e-12	Negative
B cells	GPR116	0.115804	0.000438513	Positive
B cells	KHNYN	-0.183641	2.09221e-08	Negative
B cells	MAATS1	-0.271153	6.19324e-17	Negative
B cells	MAGED2	-0.311525	4.1445e-22	Negative
B cells	MAP3K3	0.125897	0.000131025	Positive
B cells	MRPL30	-0.12751	0.000107097	Negative
B cells	NR1H3	0.309924	6.89932e-22	Positive
B cells	PACRGL	-0.169583	2.35881e-07	Negative
B cells	PCDHA2	-0.106681	0.00120741	Negative
B cells	PKIB	-0.280539	4.59921e-18	Negative
B cells	PODNL1	0.0680538	0.0392543	Positive
B cells	PRKCDBP	0.208228	1.88595e-10	Positive
B cells	RAET1E	-0.0422842	0.200554	Not
B cells	RNF165	-0.0272141	0.410181	Not
B cells	SH3BP1	0.462245	8.73514e-50	Positive
B cells	SH3BP2	0.156973	1.75967e-06	Positive
B cells	SH3D21	-0.133363	5.04982e-05	Negative
B cells	TMEM101	-0.217462	2.74479e-11	Negative
B cells	TMEM185A	-0.19366	3.3047e-09	Negative
B cells	TNC	-0.00170899	0.95876	Not
B cells	TOM1L1	-0.176851	6.90651e-08	Negative
B cells	TPSAB1	0.034843	0.291621	Not
B cells	TRPM2	0.163714	6.12586e-07	Positive
B cells	TTC39C	-0.215913	3.81581e-11	Negative
B cells	UGT1A1	-0.0794158	0.0160972	Negative
B cells	ZNF273	-0.0366563	0.267218	Not
CD8 T cells	AKR1C2	0.00402677	0.903026	Not
CD8 T cells	ANK3	-0.123199	0.000182613	Negative
CD8 T cells	ARRB2	0.382367	2.48774e-33	Positive
CD8 T cells	ATP5A1	-0.022701	0.492108	Not
CD8 T cells	BIN1	0.336166	1.09162e-25	Positive
CD8 T cells	CC2D2A	-0.250643	1.2868e-14	Negative
CD8 T cells	CLIC5	0.0982924	0.00287049	Positive
CD8 T cells	COL3A1	0.145689	9.34391e-06	Positive
CD8 T cells	CREM	0.120648	0.000248446	Positive
CD8 T cells	CYLD	0.129733	8.07969e-05	Positive
CD8 T cells	DAPL1	-0.00595447	0.857021	Not
CD8 T cells	DMKN	-0.0390971	0.236641	Not
CD8 T cells	ECHDC2	-0.0195117	0.554904	Not
CD8 T cells	ENOSF1	-0.175054	9.40258e-08	Negative
CD8 T cells	ENPP2	0.230351	1.60624e-12	Positive
CD8 T cells	FOPNL	-0.186004	1.36604e-08	Negative
CD8 T cells	GPR116	0.166549	3.87888e-07	Positive
CD8 T cells	KHNYN	-0.104785	0.00147648	Negative
CD8 T cells	MAATS1	-0.15073	4.49838e-06	Negative
CD8 T cells	MAGED2	-0.0819211	0.0130325	Negative
CD8 T cells	MAP3K3	0.193684	3.2894e-09	Positive
CD8 T cells	MRPL30	-0.0988731	0.00270886	Negative
CD8 T cells	NR1H3	0.345601	3.7886e-27	Positive
CD8 T cells	PACRGL	-0.101832	0.002007	Negative
CD8 T cells	PCDHA2	-0.0387996	0.24023	Not
CD8 T cells	PKIB	-0.171092	1.83537e-07	Negative
CD8 T cells	PODNL1	0.223859	6.85644e-12	Positive
CD8 T cells	PRKCDBP	0.271664	5.38989e-17	Positive
CD8 T cells	RAET1E	-0.125241	0.000142128	Negative
CD8 T cells	RNF165	-0.0451357	0.17182	Not
CD8 T cells	SH3BP1	0.340502	2.36321e-26	Positive
CD8 T cells	SH3BP2	0.0955383	0.00376325	Positive
CD8 T cells	SH3D21	-0.0325434	0.324657	Not
CD8 T cells	TMEM101	-0.0376973	0.253861	Not
CD8 T cells	TMEM185A	-0.0725833	0.0278728	Negative
CD8 T cells	TNC	-0.00122368	0.970465	Not
CD8 T cells	TOM1L1	-0.122375	0.000201846	Negative
CD8 T cells	TPSAB1	0.099684	0.00249706	Positive
CD8 T cells	TRPM2	0.175588	8.58106e-08	Positive
CD8 T cells	TTC39C	-0.108307	0.00101349	Negative
CD8 T cells	UGT1A1	-0.208535	1.77126e-10	Negative
CD8 T cells	ZNF273	-0.114749	0.000494883	Negative
Cytotoxic cells	AKR1C2	0.0352574	0.285917	Not
Cytotoxic cells	ANK3	-0.109578	0.000882496	Negative
Cytotoxic cells	ARRB2	0.480814	2.78276e-54	Positive
Cytotoxic cells	ATP5A1	-0.0838495	0.0110368	Negative
Cytotoxic cells	BIN1	0.377444	1.86518e-32	Positive
Cytotoxic cells	CC2D2A	-0.271013	6.43402e-17	Negative
Cytotoxic cells	CLIC5	0.0997162	0.00248899	Positive
Cytotoxic cells	COL3A1	0.10999	0.000843496	Positive
Cytotoxic cells	CREM	0.10712	0.001152	Positive
Cytotoxic cells	CYLD	0.219132	1.91878e-11	Positive
Cytotoxic cells	DAPL1	-0.0380348	0.249632	Not
Cytotoxic cells	DMKN	-0.037735	0.253387	Not
Cytotoxic cells	ECHDC2	-0.137221	3.0236e-05	Negative
Cytotoxic cells	ENOSF1	-0.248161	2.37845e-14	Negative
Cytotoxic cells	ENPP2	0.289123	3.90317e-19	Positive
Cytotoxic cells	FOPNL	-0.282634	2.53896e-18	Negative
Cytotoxic cells	GPR116	0.163001	6.86341e-07	Positive
Cytotoxic cells	KHNYN	-0.182204	2.70391e-08	Negative
Cytotoxic cells	MAATS1	-0.257788	2.11485e-15	Negative
Cytotoxic cells	MAGED2	-0.230881	1.42372e-12	Negative
Cytotoxic cells	MAP3K3	0.146737	8.04306e-06	Positive
Cytotoxic cells	MRPL30	-0.165359	4.70356e-07	Negative
Cytotoxic cells	NR1H3	0.425915	9.44973e-42	Positive
Cytotoxic cells	PACRGL	-0.228601	2.38584e-12	Negative
Cytotoxic cells	PCDHA2	-0.116142	0.000421771	Negative
Cytotoxic cells	PKIB	-0.192754	3.92065e-09	Negative
Cytotoxic cells	PODNL1	0.143999	1.18756e-05	Positive
Cytotoxic cells	PRKCDBP	0.209079	1.58466e-10	Positive
Cytotoxic cells	RAET1E	-0.0407067	0.21788	Not
Cytotoxic cells	RNF165	-0.100802	0.00222985	Negative
Cytotoxic cells	SH3BP1	0.418706	2.86289e-40	Positive
Cytotoxic cells	SH3BP2	0.0962393	0.0035148	Positive
Cytotoxic cells	SH3D21	-0.148667	6.08479e-06	Negative
Cytotoxic cells	TMEM101	-0.204314	4.15732e-10	Negative
Cytotoxic cells	TMEM185A	-0.206497	2.68047e-10	Negative
Cytotoxic cells	TNC	0.0259905	0.431555	Not
Cytotoxic cells	TOM1L1	-0.197994	1.44188e-09	Negative
Cytotoxic cells	TPSAB1	0.04976	0.13193	Not
Cytotoxic cells	TRPM2	0.213178	6.78515e-11	Positive
Cytotoxic cells	TTC39C	-0.186091	1.34472e-08	Negative
Cytotoxic cells	UGT1A1	-0.126976	0.000114516	Negative
Cytotoxic cells	ZNF273	-0.131125	6.75671e-05	Negative
DC	AKR1C2	0.048365	0.143126	Not
DC	ANK3	-0.0837385	0.0111439	Negative
DC	ARRB2	0.396355	6.70359e-36	Positive
DC	ATP5A1	-0.0820725	0.012865	Negative
DC	BIN1	0.297567	3.17025e-20	Positive
DC	CC2D2A	-0.282575	2.58217e-18	Negative
DC	CLIC5	0.103998	0.00160363	Positive
DC	COL3A1	0.125629	0.000135466	Positive
DC	CREM	0.123868	0.000168295	Positive
DC	CYLD	0.198275	1.36539e-09	Positive
DC	DAPL1	-0.0381024	0.24879	Not
DC	DMKN	0.00928524	0.778748	Not
DC	ECHDC2	-0.19568	2.25033e-09	Negative
DC	ENOSF1	-0.251476	1.04563e-14	Negative
DC	ENPP2	0.331023	6.49501e-25	Positive
DC	FOPNL	-0.240187	1.63582e-13	Negative
DC	GPR116	0.244905	5.27058e-14	Positive
DC	KHNYN	-0.152495	3.46327e-06	Negative
DC	MAATS1	-0.309302	8.40065e-22	Negative
DC	MAGED2	-0.278738	7.63568e-18	Negative
DC	MAP3K3	0.152558	3.43099e-06	Positive
DC	MRPL30	-0.127487	0.000107403	Negative
DC	NR1H3	0.391069	6.48471e-35	Positive
DC	PACRGL	-0.254589	4.77937e-15	Negative
DC	PCDHA2	-0.136586	3.29327e-05	Negative
DC	PKIB	-0.22396	6.70613e-12	Negative
DC	PODNL1	0.0916173	0.00547063	Positive
DC	PRKCDBP	0.262455	6.30455e-16	Positive
DC	RAET1E	-0.00914932	0.781904	Not
DC	RNF165	-0.0701632	0.0335395	Negative
DC	SH3BP1	0.388279	2.11271e-34	Positive
DC	SH3BP2	0.0954152	0.00380848	Positive
DC	SH3D21	-0.203483	4.90695e-10	Negative
DC	TMEM101	-0.244229	6.2086e-14	Negative
DC	TMEM185A	-0.179199	4.59343e-08	Negative
DC	TNC	0.0431682	0.191295	Not
DC	TOM1L1	-0.169216	2.50625e-07	Negative
DC	TPSAB1	0.0623851	0.0588329	Not
DC	TRPM2	0.172457	1.46008e-07	Positive
DC	TTC39C	-0.223249	7.841e-12	Negative
DC	UGT1A1	-0.116344	0.000412056	Negative
DC	ZNF273	-0.110418	0.000804633	Negative
Eosinophils	AKR1C2	-0.0152548	0.644372	Not
Eosinophils	ANK3	-0.00575329	0.861803	Not
Eosinophils	ARRB2	0.261601	7.88145e-16	Positive
Eosinophils	ATP5A1	0.0898897	0.00642366	Positive
Eosinophils	BIN1	0.0817692	0.0132024	Positive
Eosinophils	CC2D2A	0.00971656	0.768755	Not
Eosinophils	CLIC5	0.136642	3.26834e-05	Positive
Eosinophils	COL3A1	0.227986	2.73919e-12	Positive
Eosinophils	CREM	0.135859	3.62947e-05	Positive
Eosinophils	CYLD	0.292972	1.25596e-19	Positive
Eosinophils	DAPL1	-0.00321608	0.92248	Not
Eosinophils	DMKN	-0.0749807	0.0230921	Negative
Eosinophils	ECHDC2	-0.0261638	0.428488	Not
Eosinophils	ENOSF1	-0.0391859	0.235577	Not
Eosinophils	ENPP2	0.250902	1.20647e-14	Positive
Eosinophils	FOPNL	-0.00534635	0.871489	Not
Eosinophils	GPR116	0.394417	1.54778e-35	Positive
Eosinophils	KHNYN	0.182184	2.71381e-08	Positive
Eosinophils	MAATS1	0.108483	0.00099442	Positive
Eosinophils	MAGED2	0.181719	2.94747e-08	Positive
Eosinophils	MAP3K3	0.310397	5.93706e-22	Positive
Eosinophils	MRPL30	0.0650995	0.0486298	Positive
Eosinophils	NR1H3	0.208195	1.89875e-10	Positive
Eosinophils	PACRGL	0.0973662	0.00314651	Positive
Eosinophils	PCDHA2	0.0782003	0.0177999	Positive
Eosinophils	PKIB	0.0722204	0.0286662	Positive
Eosinophils	PODNL1	0.0865236	0.0087189	Positive
Eosinophils	PRKCDBP	-0.014591	0.658846	Not
Eosinophils	RAET1E	-0.0333575	0.312693	Not
Eosinophils	RNF165	-0.0338485	0.30562	Not
Eosinophils	SH3BP1	0.0551352	0.0950167	Not
Eosinophils	SH3BP2	-0.0174986	0.596458	Not
Eosinophils	SH3D21	0.0755744	0.0220244	Positive
Eosinophils	TMEM101	0.0362649	0.272363	Not
Eosinophils	TMEM185A	0.152879	3.27017e-06	Positive
Eosinophils	TNC	-0.0141134	0.669341	Not
Eosinophils	TOM1L1	0.10291	0.00179594	Positive
Eosinophils	TPSAB1	0.126701	0.000118531	Positive
Eosinophils	TRPM2	0.0164982	0.617623	Not
Eosinophils	TTC39C	0.112398	0.000645669	Positive
Eosinophils	UGT1A1	-0.177704	5.95893e-08	Negative
Eosinophils	ZNF273	-0.0675571	0.0407142	Negative
iDC	AKR1C2	0.0275948	0.403661	Not
iDC	ANK3	-0.0588855	0.0745438	Not
iDC	ARRB2	0.370428	3.10608e-31	Positive
iDC	ATP5A1	-0.0252166	0.445401	Not
iDC	BIN1	0.21692	3.08094e-11	Positive
iDC	CC2D2A	-0.0942904	0.00424525	Negative
iDC	CLIC5	0.123721	0.000171339	Positive
iDC	COL3A1	0.347515	1.88913e-27	Positive
iDC	CREM	0.0937697	0.0044624	Positive
iDC	CYLD	0.213471	6.38199e-11	Positive
iDC	DAPL1	-0.0144842	0.661187	Not
iDC	DMKN	-0.0806718	0.0144895	Negative
iDC	ECHDC2	-0.118139	0.000334359	Negative
iDC	ENOSF1	-0.16405	5.80456e-07	Negative
iDC	ENPP2	0.287302	6.63438e-19	Positive
iDC	FOPNL	-0.150395	4.72619e-06	Negative
iDC	GPR116	0.325075	4.89869e-24	Positive
iDC	KHNYN	-0.0303244	0.358752	Not
iDC	MAATS1	-0.146435	8.39845e-06	Negative
iDC	MAGED2	-0.0509701	0.122778	Not
iDC	MAP3K3	0.229525	1.9368e-12	Positive
iDC	MRPL30	-0.101593	0.00205681	Negative
iDC	NR1H3	0.346408	2.82637e-27	Positive
iDC	PACRGL	-0.111948	0.000679029	Negative
iDC	PCDHA2	-0.0888217	0.00708502	Negative
iDC	PKIB	-0.104887	0.0014608	Negative
iDC	PODNL1	0.253791	5.84713e-15	Positive
iDC	PRKCDBP	0.240108	1.66685e-13	Positive
iDC	RAET1E	-0.024724	0.454343	Not
iDC	RNF165	-0.12593	0.000130498	Negative
iDC	SH3BP1	0.20017	9.43914e-10	Positive
iDC	SH3BP2	0.0135428	0.681963	Not
iDC	SH3D21	-0.041797	0.205795	Not
iDC	TMEM101	-0.0934764	0.00458911	Negative
iDC	TMEM185A	-0.00420888	0.898664	Not
iDC	TNC	0.134407	4.40124e-05	Positive
iDC	TOM1L1	-0.0912407	0.00566682	Negative
iDC	TPSAB1	0.168084	3.01938e-07	Positive
iDC	TRPM2	0.0773033	0.0191555	Positive
iDC	TTC39C	-0.091264	0.00565448	Negative
iDC	UGT1A1	-0.126825	0.000116711	Negative
iDC	ZNF273	-0.180168	3.87538e-08	Negative
Macrophages	AKR1C2	0.0857087	0.00937443	Positive
Macrophages	ANK3	-0.0548716	0.0966103	Not
Macrophages	ARRB2	0.440019	9.36632e-45	Positive
Macrophages	ATP5A1	-0.107142	0.00114926	Negative
Macrophages	BIN1	0.233663	7.52889e-13	Positive
Macrophages	CC2D2A	-0.142151	1.53867e-05	Negative
Macrophages	CLIC5	0.0552732	0.094191	Not
Macrophages	COL3A1	0.302989	6.04689e-21	Positive
Macrophages	CREM	0.186695	1.20477e-08	Positive
Macrophages	CYLD	0.249911	1.54371e-14	Positive
Macrophages	DAPL1	-0.0372096	0.26006	Not
Macrophages	DMKN	-0.0272154	0.410158	Not
Macrophages	ECHDC2	-0.355598	9.47525e-29	Negative
Macrophages	ENOSF1	-0.320488	2.25784e-23	Negative
Macrophages	ENPP2	0.238881	2.22861e-13	Positive
Macrophages	FOPNL	-0.166445	3.94547e-07	Negative
Macrophages	GPR116	0.230141	1.68443e-12	Positive
Macrophages	KHNYN	-0.146597	8.20598e-06	Negative
Macrophages	MAATS1	-0.321398	1.67068e-23	Negative
Macrophages	MAGED2	-0.294535	7.88458e-20	Negative
Macrophages	MAP3K3	0.16178	8.32898e-07	Positive
Macrophages	MRPL30	-0.0924413	0.00506261	Negative
Macrophages	NR1H3	0.346628	2.60973e-27	Positive
Macrophages	PACRGL	-0.188742	8.27845e-09	Negative
Macrophages	PCDHA2	-0.167879	3.12236e-07	Negative
Macrophages	PKIB	-0.202231	6.29123e-10	Negative
Macrophages	PODNL1	0.204024	4.40571e-10	Positive
Macrophages	PRKCDBP	0.245031	5.11258e-14	Positive
Macrophages	RAET1E	0.00361562	0.912886	Not
Macrophages	RNF165	-0.161227	9.08744e-07	Negative
Macrophages	SH3BP1	0.289124	3.90226e-19	Positive
Macrophages	SH3BP2	0.0627513	0.0573605	Not
Macrophages	SH3D21	-0.283515	1.97465e-18	Negative
Macrophages	TMEM101	-0.308654	1.0312e-21	Negative
Macrophages	TMEM185A	-0.138825	2.43325e-05	Negative
Macrophages	TNC	0.12218	0.000206645	Positive
Macrophages	TOM1L1	-0.143613	1.25391e-05	Negative
Macrophages	TPSAB1	0.0303844	0.357803	Not
Macrophages	TRPM2	0.168104	3.00952e-07	Positive
Macrophages	TTC39C	-0.232682	9.43348e-13	Negative
Macrophages	UGT1A1	-0.0240973	0.465865	Not
Macrophages	ZNF273	-0.121882	0.000214229	Negative
Mast cells	AKR1C2	-0.0234085	0.478713	Not
Mast cells	ANK3	0.0360211	0.275602	Not
Mast cells	ARRB2	0.123408	0.000178027	Positive
Mast cells	ATP5A1	-0.054557	0.0985399	Not
Mast cells	BIN1	0.052532	0.111706	Not
Mast cells	CC2D2A	0.0496325	0.132924	Not
Mast cells	CLIC5	0.096	0.00359789	Positive
Mast cells	COL3A1	0.45128	2.94683e-47	Positive
Mast cells	CREM	0.114025	0.000537435	Positive
Mast cells	CYLD	0.151234	4.17615e-06	Positive
Mast cells	DAPL1	-0.0521587	0.114278	Not
Mast cells	DMKN	-0.110105	0.000832843	Negative
Mast cells	ECHDC2	0.0967155	0.00335465	Positive
Mast cells	ENOSF1	0.00758179	0.818552	Not
Mast cells	ENPP2	0.233094	8.58179e-13	Positive
Mast cells	FOPNL	-0.00838666	0.79968	Not
Mast cells	GPR116	0.450975	3.45415e-47	Positive
Mast cells	KHNYN	0.0820406	0.0129002	Positive
Mast cells	MAATS1	0.0262646	0.426711	Not
Mast cells	MAGED2	0.130921	6.93652e-05	Positive
Mast cells	MAP3K3	0.273949	2.88501e-17	Positive
Mast cells	MRPL30	-0.078575	0.017259	Negative
Mast cells	NR1H3	0.110667	0.000782849	Positive
Mast cells	PACRGL	0.0897762	0.00649121	Positive
Mast cells	PCDHA2	0.0516925	0.117555	Not
Mast cells	PKIB	-0.0244997	0.458448	Not
Mast cells	PODNL1	0.331947	4.72671e-25	Positive
Mast cells	PRKCDBP	0.131516	6.42331e-05	Positive
Mast cells	RAET1E	-0.0714712	0.0303655	Negative
Mast cells	RNF165	-0.0598925	0.0697073	Not
Mast cells	SH3BP1	-0.0866048	0.00865586	Negative
Mast cells	SH3BP2	-0.03886	0.239499	Not
Mast cells	SH3D21	0.172231	1.51668e-07	Positive
Mast cells	TMEM101	0.0798813	0.015484	Positive
Mast cells	TMEM185A	0.176131	7.81774e-08	Positive
Mast cells	TNC	0.0946816	0.00408846	Positive
Mast cells	TOM1L1	0.0347003	0.293602	Not
Mast cells	TPSAB1	0.273139	3.6029e-17	Positive
Mast cells	TRPM2	-0.0737489	0.0254514	Negative
Mast cells	TTC39C	0.0491839	0.136469	Not
Mast cells	UGT1A1	-0.0967797	0.00333358	Negative
Mast cells	ZNF273	-0.107135	0.00115009	Negative
Neutrophils	AKR1C2	0.0394129	0.232874	Not
Neutrophils	ANK3	-0.050342	0.127465	Not
Neutrophils	ARRB2	0.426691	6.51232e-42	Positive
Neutrophils	ATP5A1	-0.0699953	0.033967	Negative
Neutrophils	BIN1	0.257117	2.51124e-15	Positive
Neutrophils	CC2D2A	-0.152861	3.27884e-06	Negative
Neutrophils	CLIC5	0.0894161	0.00670975	Positive
Neutrophils	COL3A1	0.276063	1.60955e-17	Positive
Neutrophils	CREM	0.240731	1.43729e-13	Positive
Neutrophils	CYLD	0.229752	1.83959e-12	Positive
Neutrophils	DAPL1	-0.0128458	0.697502	Not
Neutrophils	DMKN	-0.0236533	0.474124	Not
Neutrophils	ECHDC2	-0.293362	1.11852e-19	Negative
Neutrophils	ENOSF1	-0.287505	6.25413e-19	Negative
Neutrophils	ENPP2	0.263335	5.00512e-16	Positive
Neutrophils	FOPNL	-0.11278	0.000618596	Negative
Neutrophils	GPR116	0.312372	3.16192e-22	Positive
Neutrophils	KHNYN	-0.0467139	0.157301	Not
Neutrophils	MAATS1	-0.241358	1.23778e-13	Negative
Neutrophils	MAGED2	-0.196714	1.84571e-09	Negative
Neutrophils	MAP3K3	0.16488	5.08107e-07	Positive
Neutrophils	MRPL30	-0.114623	0.000502059	Negative
Neutrophils	NR1H3	0.341646	1.57202e-26	Positive
Neutrophils	PACRGL	-0.136367	3.39115e-05	Negative
Neutrophils	PCDHA2	-0.140647	1.89536e-05	Negative
Neutrophils	PKIB	-0.113051	0.000599965	Negative
Neutrophils	PODNL1	0.22286	8.53925e-12	Positive
Neutrophils	PRKCDBP	0.227975	2.74589e-12	Positive
Neutrophils	RAET1E	-0.0378549	0.251879	Not
Neutrophils	RNF165	-0.160438	1.02857e-06	Negative
Neutrophils	SH3BP1	0.326364	3.17394e-24	Positive
Neutrophils	SH3BP2	0.0780637	0.0180007	Positive
Neutrophils	SH3D21	-0.137198	3.0331e-05	Negative
Neutrophils	TMEM101	-0.214642	4.99043e-11	Negative
Neutrophils	TMEM185A	-0.121097	0.000235429	Negative
Neutrophils	TNC	0.143289	1.31229e-05	Positive
Neutrophils	TOM1L1	-0.143345	1.30211e-05	Negative
Neutrophils	TPSAB1	0.0776994	0.0185463	Positive
Neutrophils	TRPM2	0.193145	3.64202e-09	Positive
Neutrophils	TTC39C	-0.148157	6.55325e-06	Negative
Neutrophils	UGT1A1	-0.062865	0.0569096	Not
Neutrophils	ZNF273	-0.133017	5.28368e-05	Negative
NK CD56bright cells	AKR1C2	-0.133798	4.76912e-05	Negative
NK CD56bright cells	ANK3	-0.130786	7.0589e-05	Negative
NK CD56bright cells	ARRB2	0.0785523	0.0172914	Positive
NK CD56bright cells	ATP5A1	0.0787569	0.0170016	Positive
NK CD56bright cells	BIN1	0.0583514	0.0772187	Not
NK CD56bright cells	CC2D2A	0.00648862	0.844352	Not
NK CD56bright cells	CLIC5	0.084026	0.0108684	Positive
NK CD56bright cells	COL3A1	0.0471614	0.153359	Not
NK CD56bright cells	CREM	-0.0437449	0.185426	Not
NK CD56bright cells	CYLD	-0.0819802	0.0129669	Negative
NK CD56bright cells	DAPL1	0.0761031	0.0211098	Positive
NK CD56bright cells	DMKN	-0.0257136	0.43648	Not
NK CD56bright cells	ECHDC2	0.141366	1.71601e-05	Positive
NK CD56bright cells	ENOSF1	0.0821543	0.0127754	Positive
NK CD56bright cells	ENPP2	0.00325672	0.921504	Not
NK CD56bright cells	FOPNL	0.00973576	0.768311	Not
NK CD56bright cells	GPR116	-0.0123737	0.7081	Not
NK CD56bright cells	KHNYN	0.127638	0.000105388	Positive
NK CD56bright cells	MAATS1	0.240037	1.69494e-13	Positive
NK CD56bright cells	MAGED2	0.212129	8.4452e-11	Positive
NK CD56bright cells	MAP3K3	0.106313	0.00125586	Positive
NK CD56bright cells	MRPL30	-0.122456	0.000199863	Negative
NK CD56bright cells	NR1H3	0.131225	6.66969e-05	Positive
NK CD56bright cells	PACRGL	0.0335233	0.310294	Not
NK CD56bright cells	PCDHA2	-0.0183586	0.578535	Not
NK CD56bright cells	PKIB	0.099905	0.00244203	Positive
NK CD56bright cells	PODNL1	0.152446	3.48849e-06	Positive
NK CD56bright cells	PRKCDBP	0.0114563	0.728856	Not
NK CD56bright cells	RAET1E	-0.0458953	0.164712	Not
NK CD56bright cells	RNF165	-0.053684	0.104056	Not
NK CD56bright cells	SH3BP1	-0.074612	0.0237776	Negative
NK CD56bright cells	SH3BP2	-0.0976729	0.00305254	Negative
NK CD56bright cells	SH3D21	0.205428	3.32506e-10	Positive
NK CD56bright cells	TMEM101	0.125398	0.000139398	Positive
NK CD56bright cells	TMEM185A	0.0667689	0.0431248	Positive
NK CD56bright cells	TNC	-0.0482231	0.144305	Not
NK CD56bright cells	TOM1L1	0.0130044	0.693955	Not
NK CD56bright cells	TPSAB1	0.127523	0.000106922	Positive
NK CD56bright cells	TRPM2	-0.0148883	0.652348	Not
NK CD56bright cells	TTC39C	0.117685	0.000352596	Positive
NK CD56bright cells	UGT1A1	-0.157092	1.7278e-06	Negative
NK CD56bright cells	ZNF273	-0.152291	3.56987e-06	Negative
NK CD56dim cells	AKR1C2	6.59948e-06	0.999841	Not
NK CD56dim cells	ANK3	-0.108256	0.0010192	Negative
NK CD56dim cells	ARRB2	0.386719	4.06924e-34	Positive
NK CD56dim cells	ATP5A1	-0.0647721	0.0497758	Negative
NK CD56dim cells	BIN1	0.280567	4.56366e-18	Positive
NK CD56dim cells	CC2D2A	-0.234038	6.90514e-13	Negative
NK CD56dim cells	CLIC5	0.040058	0.225309	Not
NK CD56dim cells	COL3A1	0.0692697	0.0358672	Positive
NK CD56dim cells	CREM	0.137306	2.98943e-05	Positive
NK CD56dim cells	CYLD	0.191834	4.66059e-09	Positive
NK CD56dim cells	DAPL1	-0.0308913	0.349836	Not
NK CD56dim cells	DMKN	-0.0359829	0.276111	Not
NK CD56dim cells	ECHDC2	-0.254854	4.46949e-15	Negative
NK CD56dim cells	ENOSF1	-0.268249	1.35673e-16	Negative
NK CD56dim cells	ENPP2	0.173213	1.28536e-07	Positive
NK CD56dim cells	FOPNL	-0.195906	2.15515e-09	Negative
NK CD56dim cells	GPR116	0.0882328	0.00747515	Positive
NK CD56dim cells	KHNYN	-0.166982	3.61492e-07	Negative
NK CD56dim cells	MAATS1	-0.230402	1.58755e-12	Negative
NK CD56dim cells	MAGED2	-0.225656	4.60862e-12	Negative
NK CD56dim cells	MAP3K3	0.0950638	0.00394034	Positive
NK CD56dim cells	MRPL30	-0.100288	0.00234917	Negative
NK CD56dim cells	NR1H3	0.281083	3.94385e-18	Positive
NK CD56dim cells	PACRGL	-0.217064	2.98821e-11	Negative
NK CD56dim cells	PCDHA2	-0.1256	0.000135945	Negative
NK CD56dim cells	PKIB	-0.227087	3.35026e-12	Negative
NK CD56dim cells	PODNL1	0.102914	0.00179512	Positive
NK CD56dim cells	PRKCDBP	0.152674	3.3718e-06	Positive
NK CD56dim cells	RAET1E	-0.0453385	0.169901	Not
NK CD56dim cells	RNF165	-0.0558109	0.0910278	Not
NK CD56dim cells	SH3BP1	0.441049	5.57725e-45	Positive
NK CD56dim cells	SH3BP2	0.089004	0.00696793	Positive
NK CD56dim cells	SH3D21	-0.211379	9.8677e-11	Negative
NK CD56dim cells	TMEM101	-0.195202	2.46553e-09	Negative
NK CD56dim cells	TMEM185A	-0.153253	3.09216e-06	Negative
NK CD56dim cells	TNC	0.0535643	0.104831	Not
NK CD56dim cells	TOM1L1	-0.12485	0.00014916	Negative
NK CD56dim cells	TPSAB1	0.0160071	0.62813	Not
NK CD56dim cells	TRPM2	0.176935	6.80695e-08	Positive
NK CD56dim cells	TTC39C	-0.197436	1.60601e-09	Negative
NK CD56dim cells	UGT1A1	-0.0870245	0.00833657	Negative
NK CD56dim cells	ZNF273	-0.114373	0.0005166	Negative
NK cells	AKR1C2	-0.0396435	0.230149	Not
NK cells	ANK3	-0.101517	0.00207285	Negative
NK cells	ARRB2	0.148071	6.63539e-06	Positive
NK cells	ATP5A1	-0.0133959	0.685228	Not
NK cells	BIN1	0.181663	2.97677e-08	Positive
NK cells	CC2D2A	-0.121913	0.00021344	Negative
NK cells	CLIC5	0.0785984	0.0172257	Positive
NK cells	COL3A1	0.293877	9.59508e-20	Positive
NK cells	CREM	0.0427993	0.19512	Not
NK cells	CYLD	0.0191733	0.56179	Not
NK cells	DAPL1	0.0128741	0.696869	Not
NK cells	DMKN	-0.0216985	0.511428	Not
NK cells	ECHDC2	0.109817	0.000859676	Positive
NK cells	ENOSF1	-0.0707391	0.0321087	Negative
NK cells	ENPP2	0.167919	3.10219e-07	Positive
NK cells	FOPNL	-0.0752344	0.0226304	Negative
NK cells	GPR116	0.311757	3.84974e-22	Positive
NK cells	KHNYN	0.0327913	0.320982	Not
NK cells	MAATS1	0.00109186	0.973645	Not
NK cells	MAGED2	0.0405948	0.21915	Not
NK cells	MAP3K3	0.258157	1.92313e-15	Positive
NK cells	MRPL30	-0.0859199	0.00920039	Negative
NK cells	NR1H3	0.161111	9.25437e-07	Positive
NK cells	PACRGL	-0.0560817	0.0894675	Not
NK cells	PCDHA2	-0.0197916	0.549241	Not
NK cells	PKIB	-0.0627033	0.0575515	Not
NK cells	PODNL1	0.399857	1.45728e-36	Positive
NK cells	PRKCDBP	0.262895	5.61769e-16	Positive
NK cells	RAET1E	-0.0784801	0.0173946	Negative
NK cells	RNF165	-0.031187	0.345241	Not
NK cells	SH3BP1	0.129358	8.47599e-05	Positive
NK cells	SH3BP2	0.0711437	0.0311351	Positive
NK cells	SH3D21	0.1061	0.00128463	Positive
NK cells	TMEM101	0.00726568	0.825994	Not
NK cells	TMEM185A	0.0407247	0.217678	Not
NK cells	TNC	0.0808481	0.0142756	Positive
NK cells	TOM1L1	-0.0835574	0.0113206	Negative
NK cells	TPSAB1	0.0951896	0.00389267	Positive
NK cells	TRPM2	0.0550989	0.095235	Not
NK cells	TTC39C	-0.129089	8.771e-05	Negative
NK cells	UGT1A1	-0.240288	1.59692e-13	Negative
NK cells	ZNF273	-0.141169	1.76366e-05	Negative
pDC	AKR1C2	0.0456503	0.16698	Not
pDC	ANK3	-0.157893	1.52767e-06	Negative
pDC	ARRB2	0.246085	3.95574e-14	Positive
pDC	ATP5A1	-0.17665	7.1501e-08	Negative
pDC	BIN1	0.247437	2.84198e-14	Positive
pDC	CC2D2A	-0.214025	5.68183e-11	Negative
pDC	CLIC5	0.0648337	0.0495586	Positive
pDC	COL3A1	0.0140595	0.670528	Not
pDC	CREM	0.0293037	0.375165	Not
pDC	CYLD	-0.0406664	0.218337	Not
pDC	DAPL1	-0.00211055	0.949082	Not
pDC	DMKN	0.00864632	0.793616	Not
pDC	ECHDC2	0.207207	2.32138e-10	Positive
pDC	ENOSF1	-0.0498165	0.131492	Not
pDC	ENPP2	0.262372	6.4431e-16	Positive
pDC	FOPNL	-0.297552	3.18444e-20	Negative
pDC	GPR116	0.196674	1.85976e-09	Positive
pDC	KHNYN	-0.20246	6.0132e-10	Negative
pDC	MAATS1	-0.0747296	0.023557	Negative
pDC	MAGED2	-0.0922083	0.00517511	Negative
pDC	MAP3K3	0.0437006	0.185872	Not
pDC	MRPL30	-0.331256	5.99429e-25	Negative
pDC	NR1H3	0.342018	1.37628e-26	Positive
pDC	PACRGL	-0.236115	4.26455e-13	Negative
pDC	PCDHA2	-0.0784657	0.0174152	Negative
pDC	PKIB	-0.0720868	0.0289631	Negative
pDC	PODNL1	0.174185	1.0903e-07	Positive
pDC	PRKCDBP	0.296544	4.3162e-20	Positive
pDC	RAET1E	-0.080557	0.0146304	Negative
pDC	RNF165	-0.0761608	0.0210121	Negative
pDC	SH3BP1	0.184239	1.87934e-08	Positive
pDC	SH3BP2	0.0275227	0.40489	Not
pDC	SH3D21	0.0828015	0.0120849	Positive
pDC	TMEM101	0.0583945	0.0770001	Not
pDC	TMEM185A	-0.208909	1.641e-10	Negative
pDC	TNC	-0.00360468	0.913148	Not
pDC	TOM1L1	-0.206733	2.55513e-10	Negative
pDC	TPSAB1	0.104425	0.00153349	Positive
pDC	TRPM2	0.08347	0.0114067	Positive
pDC	TTC39C	-0.133439	4.99938e-05	Negative
pDC	UGT1A1	-0.111171	0.000740311	Negative
pDC	ZNF273	-0.179233	4.56606e-08	Negative
T cells	AKR1C2	-0.00525442	0.873681	Not
T cells	ANK3	-0.0205364	0.53431	Not
T cells	ARRB2	0.460089	2.79015e-49	Positive
T cells	ATP5A1	-0.102802	0.00181615	Negative
T cells	BIN1	0.315297	1.23274e-22	Positive
T cells	CC2D2A	-0.173135	1.30244e-07	Negative
T cells	CLIC5	0.127694	0.000104644	Positive
T cells	COL3A1	0.100667	0.00226059	Positive
T cells	CREM	0.149866	5.10767e-06	Positive
T cells	CYLD	0.310346	6.03399e-22	Positive
T cells	DAPL1	-0.0200941	0.543152	Not
T cells	DMKN	-0.032657	0.322969	Not
T cells	ECHDC2	-0.177885	5.77518e-08	Negative
T cells	ENOSF1	-0.213236	6.70414e-11	Negative
T cells	ENPP2	0.266129	2.39096e-16	Positive
T cells	FOPNL	-0.215552	4.11922e-11	Negative
T cells	GPR116	0.198104	1.41133e-09	Positive
T cells	KHNYN	-0.120388	0.000256267	Negative
T cells	MAATS1	-0.216816	3.14984e-11	Negative
T cells	MAGED2	-0.253579	6.16959e-15	Negative
T cells	MAP3K3	0.184725	1.72194e-08	Positive
T cells	MRPL30	-0.085201	0.00980463	Negative
T cells	NR1H3	0.373212	1.02598e-31	Positive
T cells	PACRGL	-0.142018	1.56755e-05	Negative
T cells	PCDHA2	-0.0764024	0.0206069	Negative
T cells	PKIB	-0.213141	6.83806e-11	Negative
T cells	PODNL1	0.0733588	0.0262408	Positive
T cells	PRKCDBP	0.118636	0.000315392	Positive
T cells	RAET1E	-0.014082	0.670033	Not
T cells	RNF165	-0.073813	0.0253237	Negative
T cells	SH3BP1	0.40944	2.0349e-38	Positive
T cells	SH3BP2	0.116679	0.000396357	Positive
T cells	SH3D21	-0.162205	7.78686e-07	Negative
T cells	TMEM101	-0.246682	3.41884e-14	Negative
T cells	TMEM185A	-0.143413	1.2896e-05	Negative
T cells	TNC	-0.0131154	0.691475	Not
T cells	TOM1L1	-0.148807	5.96251e-06	Negative
T cells	TPSAB1	0.0390279	0.237473	Not
T cells	TRPM2	0.171365	1.75361e-07	Positive
T cells	TTC39C	-0.180633	3.57084e-08	Negative
T cells	UGT1A1	-0.0674173	0.0411332	Negative
T cells	ZNF273	-0.0470623	0.154225	Not
T helper cells	AKR1C2	-0.0557606	0.0913199	Not
T helper cells	ANK3	0.232865	9.04603e-13	Positive
T helper cells	ARRB2	0.284874	1.33762e-18	Positive
T helper cells	ATP5A1	0.131371	6.54543e-05	Positive
T helper cells	BIN1	0.0370918	0.261573	Not
T helper cells	CC2D2A	0.0821093	0.0128246	Positive
T helper cells	CLIC5	0.144225	1.15033e-05	Positive
T helper cells	COL3A1	0.127357	0.000109177	Positive
T helper cells	CREM	0.1701	2.16516e-07	Positive
T helper cells	CYLD	0.474476	1.02445e-52	Positive
T helper cells	DAPL1	-0.0595188	0.0714711	Not
T helper cells	DMKN	-0.16614	4.1454e-07	Negative
T helper cells	ECHDC2	-0.137703	2.83314e-05	Negative
T helper cells	ENOSF1	0.0594293	0.0718992	Not
T helper cells	ENPP2	0.264807	3.39522e-16	Positive
T helper cells	FOPNL	0.178305	5.36819e-08	Positive
T helper cells	GPR116	0.33848	4.83855e-26	Positive
T helper cells	KHNYN	0.252558	7.9742e-15	Positive
T helper cells	MAATS1	0.0174829	0.596788	Not
T helper cells	MAGED2	-0.074031	0.0248935	Negative
T helper cells	MAP3K3	0.250349	1.38469e-14	Positive
T helper cells	MRPL30	0.253947	5.62167e-15	Positive
T helper cells	NR1H3	0.160438	1.02862e-06	Positive
T helper cells	PACRGL	0.246429	3.63681e-14	Positive
T helper cells	PCDHA2	0.0654204	0.0475281	Positive
T helper cells	PKIB	-0.0234057	0.478767	Not
T helper cells	PODNL1	-0.100697	0.00225384	Negative
T helper cells	PRKCDBP	-0.264001	4.19959e-16	Negative
T helper cells	RAET1E	0.0231758	0.483097	Not
T helper cells	RNF165	0.00967423	0.769734	Not
T helper cells	SH3BP1	0.123405	0.000178089	Positive
T helper cells	SH3BP2	0.128389	9.5854e-05	Positive
T helper cells	SH3D21	-0.0541614	0.10101	Not
T helper cells	TMEM101	-0.149626	5.29031e-06	Negative
T helper cells	TMEM185A	0.148288	6.42974e-06	Positive
T helper cells	TNC	0.0507751	0.124218	Not
T helper cells	TOM1L1	0.113579	0.000565281	Positive
T helper cells	TPSAB1	0.0352747	0.28568	Not
T helper cells	TRPM2	-0.079966	0.0153747	Negative
T helper cells	TTC39C	0.0810525	0.0140311	Positive
T helper cells	UGT1A1	-0.0287812	0.383744	Not
T helper cells	ZNF273	0.194518	2.8085e-09	Positive
Tcm	AKR1C2	-0.0331281	0.316035	Not
Tcm	ANK3	0.290495	2.61045e-19	Positive
Tcm	ARRB2	0.189181	7.63417e-09	Positive
Tcm	ATP5A1	0.0104543	0.751755	Not
Tcm	BIN1	-0.0162798	0.622285	Not
Tcm	CC2D2A	0.261354	8.40558e-16	Positive
Tcm	CLIC5	0.169027	2.58536e-07	Positive
Tcm	COL3A1	0.210429	1.20073e-10	Positive
Tcm	CREM	0.139623	2.18188e-05	Positive
Tcm	CYLD	0.512074	1.66294e-62	Positive
Tcm	DAPL1	-0.0692816	0.0358353	Negative
Tcm	DMKN	-0.102311	0.00191049	Negative
Tcm	ECHDC2	-0.112764	0.000619704	Negative
Tcm	ENOSF1	0.0515921	0.11827	Not
Tcm	ENPP2	0.263687	4.56208e-16	Positive
Tcm	FOPNL	0.154338	2.62701e-06	Positive
Tcm	GPR116	0.414189	2.32741e-39	Positive
Tcm	KHNYN	0.253725	5.94637e-15	Positive
Tcm	MAATS1	0.0148913	0.652283	Not
Tcm	MAGED2	-0.0902528	0.0062118	Negative
Tcm	MAP3K3	0.283538	1.96202e-18	Positive
Tcm	MRPL30	0.135233	3.9449e-05	Positive
Tcm	NR1H3	0.0333007	0.313519	Not
Tcm	PACRGL	0.259198	1.4709e-15	Positive
Tcm	PCDHA2	0.117623	0.00035515	Positive
Tcm	PKIB	-0.027628	0.403095	Not
Tcm	PODNL1	-0.0512456	0.120766	Not
Tcm	PRKCDBP	-0.202495	5.97148e-10	Negative
Tcm	RAET1E	0.0627471	0.0573771	Not
Tcm	RNF165	0.0137091	0.678275	Not
Tcm	SH3BP1	0.0330194	0.317626	Not
Tcm	SH3BP2	0.17927	4.53701e-08	Positive
Tcm	SH3D21	-0.0199367	0.546317	Not
Tcm	TMEM101	-0.162797	7.08893e-07	Negative
Tcm	TMEM185A	0.178192	5.47484e-08	Positive
Tcm	TNC	0.0946023	0.00411979	Positive
Tcm	TOM1L1	0.116745	0.000393343	Positive
Tcm	TPSAB1	0.000752544	0.981834	Not
Tcm	TRPM2	-0.113974	0.000540512	Negative
Tcm	TTC39C	0.0825041	0.012398	Positive
Tcm	UGT1A1	0.0735889	0.0257726	Positive
Tcm	ZNF273	0.231403	1.26417e-12	Positive
Tem	AKR1C2	-0.0139819	0.672241	Not
Tem	ANK3	0.0273051	0.408616	Not
Tem	ARRB2	0.406194	8.78512e-38	Positive
Tem	ATP5A1	-0.104798	0.00147447	Negative
Tem	BIN1	0.267925	1.47992e-16	Positive
Tem	CC2D2A	-0.0544823	0.0990027	Not
Tem	CLIC5	0.0529152	0.109114	Not
Tem	COL3A1	0.179444	4.40082e-08	Positive
Tem	CREM	0.158912	1.30488e-06	Positive
Tem	CYLD	0.2274	3.12415e-12	Positive
Tem	DAPL1	0.00584468	0.85963	Not
Tem	DMKN	0.0147673	0.654989	Not
Tem	ECHDC2	-0.102889	0.00179974	Negative
Tem	ENOSF1	-0.127086	0.000112958	Negative
Tem	ENPP2	0.296271	4.68584e-20	Positive
Tem	FOPNL	-0.179152	4.63164e-08	Negative
Tem	GPR116	0.264082	4.11158e-16	Positive
Tem	KHNYN	-0.0235072	0.476861	Not
Tem	MAATS1	-0.185744	1.43218e-08	Negative
Tem	MAGED2	-0.226859	3.52551e-12	Negative
Tem	MAP3K3	0.20954	1.44198e-10	Positive
Tem	MRPL30	-0.149958	5.03954e-06	Negative
Tem	NR1H3	0.22891	2.22537e-12	Positive
Tem	PACRGL	-0.102961	0.00178632	Negative
Tem	PCDHA2	-0.0551842	0.0947227	Not
Tem	PKIB	-0.237991	2.74871e-13	Negative
Tem	PODNL1	0.129388	8.44324e-05	Positive
Tem	PRKCDBP	0.21483	4.79703e-11	Positive
Tem	RAET1E	-0.0420659	0.20289	Not
Tem	RNF165	-0.0210948	0.523252	Not
Tem	SH3BP1	0.354214	1.59139e-28	Positive
Tem	SH3BP2	0.181839	2.88507e-08	Positive
Tem	SH3D21	-0.0717179	0.0297966	Negative
Tem	TMEM101	-0.147327	7.38804e-06	Negative
Tem	TMEM185A	-0.0328272	0.320452	Not
Tem	TNC	0.05838	0.0770733	Not
Tem	TOM1L1	-0.0508176	0.123903	Not
Tem	TPSAB1	0.0612838	0.0634504	Not
Tem	TRPM2	0.162523	7.40483e-07	Positive
Tem	TTC39C	-0.189666	6.98015e-09	Negative
Tem	UGT1A1	0.00329364	0.920617	Not
Tem	ZNF273	-0.0685638	0.0378019	Negative
TFH	AKR1C2	-0.0559315	0.09033	Not
TFH	ANK3	-0.0770728	0.0195182	Negative
TFH	ARRB2	0.389236	1.41094e-34	Positive
TFH	ATP5A1	-0.00381101	0.908199	Not
TFH	BIN1	0.252893	7.33158e-15	Positive
TFH	CC2D2A	-0.162935	6.93553e-07	Negative
TFH	CLIC5	0.0708155	0.031923	Positive
TFH	COL3A1	0.105973	0.00130215	Positive
TFH	CREM	0.0986738	0.00276338	Positive
TFH	CYLD	0.270115	8.2062e-17	Positive
TFH	DAPL1	-0.0305073	0.35586	Not
TFH	DMKN	-0.0726652	0.0276965	Negative
TFH	ECHDC2	-0.152281	3.57505e-06	Negative
TFH	ENOSF1	-0.210367	1.21622e-10	Negative
TFH	ENPP2	0.247637	2.70588e-14	Positive
TFH	FOPNL	-0.140127	2.036e-05	Negative
TFH	GPR116	0.210911	1.08709e-10	Positive
TFH	KHNYN	-0.0588137	0.074899	Not
TFH	MAATS1	-0.158752	1.33768e-06	Negative
TFH	MAGED2	-0.112492	0.000638899	Negative
TFH	MAP3K3	0.174934	9.59692e-08	Positive
TFH	MRPL30	-0.0495517	0.133558	Not
TFH	NR1H3	0.300169	1.43756e-20	Positive
TFH	PACRGL	-0.108542	0.000988069	Negative
TFH	PCDHA2	-0.0332653	0.314033	Not
TFH	PKIB	-0.130542	7.28338e-05	Negative
TFH	PODNL1	0.111832	0.00068783	Positive
TFH	PRKCDBP	0.153332	3.05581e-06	Positive
TFH	RAET1E	-0.0871034	0.00827773	Negative
TFH	RNF165	0.0540196	0.101907	Not
TFH	SH3BP1	0.376789	2.43259e-32	Positive
TFH	SH3BP2	0.0944792	0.00416889	Positive
TFH	SH3D21	-0.128804	9.09385e-05	Negative
TFH	TMEM101	-0.129647	8.16893e-05	Negative
TFH	TMEM185A	-0.0458507	0.165123	Not
TFH	TNC	0.020299	0.539047	Not
TFH	TOM1L1	-0.105345	0.00139186	Negative
TFH	TPSAB1	0.0502801	0.127934	Not
TFH	TRPM2	0.156448	1.90706e-06	Positive
TFH	TTC39C	-0.126198	0.000126211	Negative
TFH	UGT1A1	-0.162349	7.6117e-07	Negative
TFH	ZNF273	-0.0930556	0.00477653	Negative
Tgd	AKR1C2	-0.0273983	0.407018	Not
Tgd	ANK3	-0.0330859	0.316651	Not
Tgd	ARRB2	0.158567	1.37653e-06	Positive
Tgd	ATP5A1	-0.03549	0.282748	Not
Tgd	BIN1	0.0832873	0.0115886	Positive
Tgd	CC2D2A	0.0154482	0.640179	Not
Tgd	CLIC5	-0.0117026	0.723263	Not
Tgd	COL3A1	0.185252	1.56541e-08	Positive
Tgd	CREM	0.0486184	0.14104	Not
Tgd	CYLD	0.101679	0.0020388	Positive
Tgd	DAPL1	0.0150356	0.649137	Not
Tgd	DMKN	0.0476837	0.148852	Not
Tgd	ECHDC2	-0.124881	0.000148585	Negative
Tgd	ENOSF1	-0.170146	2.14841e-07	Negative
Tgd	ENPP2	0.097736	0.00303351	Positive
Tgd	FOPNL	-0.0707102	0.0321793	Negative
Tgd	GPR116	0.169677	2.32236e-07	Positive
Tgd	KHNYN	-0.0647204	0.049959	Negative
Tgd	MAATS1	-0.155855	2.08765e-06	Negative
Tgd	MAGED2	-0.168421	2.85697e-07	Negative
Tgd	MAP3K3	0.134568	4.30841e-05	Positive
Tgd	MRPL30	-0.0739446	0.0250632	Negative
Tgd	NR1H3	0.0443746	0.17917	Not
Tgd	PACRGL	0.0130895	0.692054	Not
Tgd	PCDHA2	-0.0621362	0.0598514	Not
Tgd	PKIB	-0.115249	0.000467371	Negative
Tgd	PODNL1	0.178773	4.94835e-08	Positive
Tgd	PRKCDBP	0.246079	3.96112e-14	Positive
Tgd	RAET1E	-0.0814827	0.0135283	Negative
Tgd	RNF165	0.078503	0.0173617	Positive
Tgd	SH3BP1	0.178892	4.84655e-08	Positive
Tgd	SH3BP2	0.0881076	0.00756061	Positive
Tgd	SH3D21	-0.141584	1.66502e-05	Negative
Tgd	TMEM101	-0.117031	0.000380514	Negative
Tgd	TMEM185A	-0.0671182	0.042042	Negative
Tgd	TNC	0.208532	1.7723e-10	Positive
Tgd	TOM1L1	-0.0382688	0.246729	Not
Tgd	TPSAB1	-0.021907	0.50738	Not
Tgd	TRPM2	0.109402	0.000899615	Positive
Tgd	TTC39C	-0.112893	0.000610771	Negative
Tgd	UGT1A1	-0.0728604	0.02728	Negative
Tgd	ZNF273	-0.0262776	0.426483	Not
Th1 cells	AKR1C2	0.022066	0.504301	Not
Th1 cells	ANK3	-0.0851269	0.00986885	Negative
Th1 cells	ARRB2	0.494142	1.10223e-57	Positive
Th1 cells	ATP5A1	-0.115537	0.000452187	Negative
Th1 cells	BIN1	0.311954	3.61468e-22	Positive
Th1 cells	CC2D2A	-0.198726	1.25098e-09	Negative
Th1 cells	CLIC5	0.038124	0.248522	Not
Th1 cells	COL3A1	0.192973	3.76253e-09	Positive
Th1 cells	CREM	0.244638	5.62333e-14	Positive
Th1 cells	CYLD	0.293473	1.08213e-19	Positive
Th1 cells	DAPL1	-0.0415266	0.208746	Not
Th1 cells	DMKN	-0.0178453	0.589201	Not
Th1 cells	ECHDC2	-0.340773	2.14572e-26	Negative
Th1 cells	ENOSF1	-0.325962	3.63548e-24	Negative
Th1 cells	ENPP2	0.241759	1.1246e-13	Positive
Th1 cells	FOPNL	-0.179833	4.11094e-08	Negative
Th1 cells	GPR116	0.176893	6.8565e-08	Positive
Th1 cells	KHNYN	-0.19071	5.74949e-09	Negative
Th1 cells	MAATS1	-0.309938	6.8676e-22	Negative
Th1 cells	MAGED2	-0.339625	3.2272e-26	Negative
Th1 cells	MAP3K3	0.155671	2.14676e-06	Positive
Th1 cells	MRPL30	-0.0866559	0.0086164	Negative
Th1 cells	NR1H3	0.318737	4.01836e-23	Positive
Th1 cells	PACRGL	-0.182211	2.70083e-08	Negative
Th1 cells	PCDHA2	-0.16085	9.64222e-07	Negative
Th1 cells	PKIB	-0.281581	3.42516e-18	Negative
Th1 cells	PODNL1	0.13221	5.87067e-05	Positive
Th1 cells	PRKCDBP	0.245712	4.33165e-14	Positive
Th1 cells	RAET1E	-0.0337838	0.306547	Not
Th1 cells	RNF165	-0.0925234	0.00502352	Negative
Th1 cells	SH3BP1	0.486394	1.09236e-55	Positive
Th1 cells	SH3BP2	0.135193	3.96633e-05	Positive
Th1 cells	SH3D21	-0.275349	1.96151e-17	Negative
Th1 cells	TMEM101	-0.306083	2.31252e-21	Negative
Th1 cells	TMEM185A	-0.171001	1.86361e-07	Negative
Th1 cells	TNC	0.10095	0.00219647	Positive
Th1 cells	TOM1L1	-0.186513	1.24544e-08	Negative
Th1 cells	TPSAB1	0.0432398	0.190559	Not
Th1 cells	TRPM2	0.210766	1.12015e-10	Positive
Th1 cells	TTC39C	-0.271809	5.1815e-17	Negative
Th1 cells	UGT1A1	-0.0499343	0.130581	Not
Th1 cells	ZNF273	-0.0907111	0.00595337	Negative
Th17 cells	AKR1C2	0.0177261	0.591693	Not
Th17 cells	ANK3	0.0550489	0.0955359	Not
Th17 cells	ARRB2	-0.0603652	0.0675268	Not
Th17 cells	ATP5A1	0.0116736	0.723922	Not
Th17 cells	BIN1	-0.0280902	0.39527	Not
Th17 cells	CC2D2A	-0.0421052	0.202468	Not
Th17 cells	CLIC5	0.112393	0.000645998	Positive
Th17 cells	COL3A1	-0.004753	0.885648	Not
Th17 cells	CREM	-0.0971068	0.00322804	Negative
Th17 cells	CYLD	-0.0190298	0.564722	Not
Th17 cells	DAPL1	0.0269386	0.414938	Not
Th17 cells	DMKN	0.0299654	0.364473	Not
Th17 cells	ECHDC2	0.0907138	0.0059519	Positive
Th17 cells	ENOSF1	0.0492524	0.135923	Not
Th17 cells	ENPP2	-0.0866326	0.00863433	Negative
Th17 cells	FOPNL	0.0236595	0.47401	Not
Th17 cells	GPR116	0.0397312	0.229119	Not
Th17 cells	KHNYN	0.161648	8.50368e-07	Positive
Th17 cells	MAATS1	0.058436	0.07679	Not
Th17 cells	MAGED2	0.0661044	0.0452498	Positive
Th17 cells	MAP3K3	-0.0280623	0.39574	Not
Th17 cells	MRPL30	-0.113278	0.000584862	Negative
Th17 cells	NR1H3	0.121807	0.000216179	Positive
Th17 cells	PACRGL	-0.0508229	0.123864	Not
Th17 cells	PCDHA2	-0.0549027	0.0964209	Not
Th17 cells	PKIB	0.161275	9.01815e-07	Positive
Th17 cells	PODNL1	0.0233405	0.479992	Not
Th17 cells	PRKCDBP	-0.13297	5.31611e-05	Negative
Th17 cells	RAET1E	0.0888085	0.00709354	Positive
Th17 cells	RNF165	-0.116098	0.000423893	Negative
Th17 cells	SH3BP1	-0.116916	0.000385615	Negative
Th17 cells	SH3BP2	-0.0934489	0.00460114	Negative
Th17 cells	SH3D21	0.0895597	0.00662181	Positive
Th17 cells	TMEM101	0.0477628	0.148179	Not
Th17 cells	TMEM185A	0.0154643	0.639832	Not
Th17 cells	TNC	-0.0580787	0.0786139	Not
Th17 cells	TOM1L1	0.037102	0.261442	Not
Th17 cells	TPSAB1	0.0440296	0.182578	Not
Th17 cells	TRPM2	-0.0468695	0.155922	Not
Th17 cells	TTC39C	0.0880433	0.00760479	Positive
Th17 cells	UGT1A1	-0.0308012	0.351244	Not
Th17 cells	ZNF273	-0.124211	0.000161368	Negative
Th2 cells	AKR1C2	-0.0117965	0.721136	Not
Th2 cells	ANK3	-0.0538031	0.103289	Not
Th2 cells	ARRB2	0.241039	1.3356e-13	Positive
Th2 cells	ATP5A1	0.0857078	0.00937513	Positive
Th2 cells	BIN1	-0.0130384	0.693196	Not
Th2 cells	CC2D2A	-0.154894	2.41547e-06	Negative
Th2 cells	CLIC5	-0.0656564	0.0467314	Negative
Th2 cells	COL3A1	-0.025399	0.442115	Not
Th2 cells	CREM	0.104524	0.00151766	Positive
Th2 cells	CYLD	0.215044	4.58547e-11	Positive
Th2 cells	DAPL1	-0.0304064	0.357454	Not
Th2 cells	DMKN	-0.0940944	0.00432586	Negative
Th2 cells	ECHDC2	-0.499098	5.47108e-59	Negative
Th2 cells	ENOSF1	-0.277318	1.13565e-17	Negative
Th2 cells	ENPP2	-0.0106864	0.746431	Not
Th2 cells	FOPNL	0.125882	0.000131264	Positive
Th2 cells	GPR116	0.0161383	0.625314	Not
Th2 cells	KHNYN	-0.0183324	0.579077	Not
Th2 cells	MAATS1	-0.141887	1.59635e-05	Negative
Th2 cells	MAGED2	-0.107453	0.00111152	Negative
Th2 cells	MAP3K3	0.0620021	0.0604058	Not
Th2 cells	MRPL30	0.216476	3.38628e-11	Positive
Th2 cells	NR1H3	0.00864326	0.793687	Not
Th2 cells	PACRGL	-0.0680996	0.039122	Negative
Th2 cells	PCDHA2	-0.0249071	0.451008	Not
Th2 cells	PKIB	-0.113684	0.000558591	Negative
Th2 cells	PODNL1	-0.228657	2.35574e-12	Negative
Th2 cells	PRKCDBP	-0.114992	0.000481349	Negative
Th2 cells	RAET1E	0.0114484	0.729036	Not
Th2 cells	RNF165	-0.0123038	0.709675	Not
Th2 cells	SH3BP1	0.275069	2.11914e-17	Positive
Th2 cells	SH3BP2	-0.0209249	0.526604	Not
Th2 cells	SH3D21	-0.338809	4.30798e-26	Negative
Th2 cells	TMEM101	-0.179947	4.02928e-08	Negative
Th2 cells	TMEM185A	0.00177475	0.957175	Not
Th2 cells	TNC	-0.00471289	0.886606	Not
Th2 cells	TOM1L1	0.094532	0.00414779	Positive
Th2 cells	TPSAB1	-0.0474908	0.150505	Not
Th2 cells	TRPM2	0.0504776	0.126441	Not
Th2 cells	TTC39C	-0.110425	0.000804025	Negative
Th2 cells	UGT1A1	-0.0890057	0.00696691	Negative
Th2 cells	ZNF273	0.055841	0.0908532	Not
TReg	AKR1C2	0.0300536	0.363064	Not
TReg	ANK3	-0.116293	0.000414499	Negative
TReg	ARRB2	0.423168	3.50136e-41	Positive
TReg	ATP5A1	-0.0911034	0.00573989	Negative
TReg	BIN1	0.254169	5.31556e-15	Positive
TReg	CC2D2A	-0.300956	1.13017e-20	Negative
TReg	CLIC5	-0.0060455	0.854859	Not
TReg	COL3A1	0.0059762	0.856505	Not
TReg	CREM	0.0762857	0.0208018	Positive
TReg	CYLD	0.21412	5.57e-11	Positive
TReg	DAPL1	-0.0441434	0.181449	Not
TReg	DMKN	0.00244643	0.940993	Not
TReg	ECHDC2	-0.256722	2.77866e-15	Negative
TReg	ENOSF1	-0.255753	3.55704e-15	Negative
TReg	ENPP2	0.0930642	0.00477266	Positive
TReg	FOPNL	-0.22304	8.20818e-12	Negative
TReg	GPR116	-0.0660266	0.0455042	Negative
TReg	KHNYN	-0.209038	1.59809e-10	Negative
TReg	MAATS1	-0.261575	7.9358e-16	Negative
TReg	MAGED2	-0.244816	5.38548e-14	Negative
TReg	MAP3K3	0.0573403	0.0824953	Not
TReg	MRPL30	-0.0686914	0.0374457	Negative
TReg	NR1H3	0.29609	4.9485e-20	Positive
TReg	PACRGL	-0.283729	1.85757e-18	Negative
TReg	PCDHA2	-0.150071	4.95626e-06	Negative
TReg	PKIB	-0.227598	2.98865e-12	Negative
TReg	PODNL1	0.014237	0.666619	Not
TReg	PRKCDBP	0.122364	0.000202098	Positive
TReg	RAET1E	0.0230459	0.485554	Not
TReg	RNF165	-0.109639	0.000876544	Negative
TReg	SH3BP1	0.462354	8.23476e-50	Positive
TReg	SH3BP2	0.0714898	0.0303223	Positive
TReg	SH3D21	-0.225272	5.01813e-12	Negative
TReg	TMEM101	-0.259398	1.39665e-15	Negative
TReg	TMEM185A	-0.184962	1.6496e-08	Negative
TReg	TNC	-0.00300656	0.927516	Not
TReg	TOM1L1	-0.170831	1.91731e-07	Negative
TReg	TPSAB1	-0.00310788	0.925081	Not
TReg	TRPM2	0.230466	1.56472e-12	Positive
TReg	TTC39C	-0.233035	8.69967e-13	Negative
TReg	UGT1A1	-0.0931527	0.00473271	Negative
TReg	ZNF273	-0.0690123	0.0365627	Negative

[truncated: 2 more sheets: Table S11, Table S12]
